# Supplementary material for: Hosts manipulate lifestyle switch and pathogenicity heterogeneity of opportunistic pathogens in the single-cell resolution
Source: eLife. 2024 Aug 27;13:RP96789. doi: 10.7554/eLife.96789 (PMC11349298; doi:10.7554/eLife.96789)
Supplement: Supplementary file 1. [file elife-96789-supp1.xlsx]

## Sheet: Sheet1
Primer	Primer sequence (5'-3')	Function
PigA-RT-F	ATGGCTTTATGGGCGTGTCC	qPCR primers, coding region of gene pigA
PigA-RT-R	GAGAGGCAATCTTTCGGGCT
PigC-RT-F	AAGTTCACGACCCGCTACGC	qPCR primers, coding region of gene pigC
PigC-RT-R	GGGGCCATAGGGGTTTTTGTAC
PigI-RT-F	CGAAGGTGCTCAGATCAAAGGC	qPCR primers, coding region of gene pigI
PigI-RT-R	CTTCAGGCTCCACAGGCACC
PigM-RT-F	GCTCGGCACTTTCGTCGTTC	qPCR primers, coding region of gene pigM
PigM-RT-R	CTTTCAAGTGGCGTTTCATCCTC
Wzc-RT-F	CTATCCGACCGATTCAGCCG	qPCR primers, coding region of gene wzc
Wzc-RT-R	GCCCAGTATCAACGCCAACAA
Wza-RT-F	GTGACGGGCGAAGTTACCAAA	qPCR primers, coding region of gene wza
Wza-RT-R	GCCAGTCGGCATTTTCAGTCA
WecA-RT-F	TCGCCACCATCGTTCCCTAT	qPCR primers, coding region of gene wecA
WecA-RT-R	GGCGTCCCCCATAAACACCTT
SwrW-RT-F	CCCTGAAAGGCGAGTGTGCT	qPCR primers, coding region of gene SwrW
SwrW-RT-R	AATACAAAATCGTTCAGCACCTCG
CBA-RT-F	GGTATGTTGCTGGCAATCCTG	qPCR primers, coding region of gene CBA
CBA-RT-R	GGTTCAACGAAGATGGACGC
chbC-RT-F	CACCTCCCTGGCCTACTACT	qPCR primers, coding region of gene chbC
chbC-RT-R	GTTGGTGTTGAAGAACGCCC
srlB-RT-F	TTTCACACCACCATCACGCA	qPCR primers, coding region of gene srlB
srlB-RT-R	GCGGTGGATGAAGCAGAACT
galK-RT-F	TATGCTCGCCGATCAGGTTC	qPCR primers, coding region of gene galK
galK-RT-R	CCGCTTACCCATTCCCTGTT
CoA-RT-F	CGGCAACGTTACCAGATGGC	qPCR primers, coding region of gene CoA
CoA-RT-R	ACGCCAACCTGGTGCTTAAC
guaB-RT-F	TCTTTACAGGCGTTCGGCTT	qPCR primers, coding region of gene guaB
guaB-RT-R	GTGCTGCAGAAAATGCACGA
lsrK-RT-F	GAAAAGGCGGCAATCTGCTC	qPCR primers, coding region of gene lsrK
lsrK-RT-R	CCTGAACGCTGCAACAAACA
oppC-RT-F	TCGATGAACTCCTTGCGCTT	qPCR primers, coding region of gene oppC
oppC-RT-R	CGTGATCCTGCTGGTGACTT
LivM-RT-F	TATACAGCACCAGCAGCACC	qPCR primers, coding region of gene livM
LivM-RT-R	CGATCCACGAGTTTTTCGGC
OMT-RT-F	ACCTGCAGCGAGTTGAGAAA	qPCR primers, coding region of gene OMT
OMT-RT-R	GTGTTTGTGCTCGGCATCAG
HisP-RT-F	AATACCTTCAGCTGGCCGTC	qPCR primers, coding region of gene hisP
Hisp-RT-R	CAAAAGCACCTTTCTGCGCT
CysA-RT-F	CAGGTTGCAGCAGTTGATCG	qPCR primers, coding region of gene cysA
CysA-RT-R	TGGCACCAGGAACCGATAAG
dnaE-RT-F	ATTTGCCTGTCAGTCAGCGA	qPCR primers, coding region of gene dnaE
dnaE-RT-R	CGGCGGGCTTAAAATGATGG
infC-RT-F	GCCAAAATCACCCTGCGTTT	qPCR primers, coding region of gene infC
infC-RT-R	GAAGGATTCGACCACTGCCA
yidC-RT-F	CTGATAGACGAACGACGGGG	qPCR primers, coding region of gene yidC
yidC-RT-R	TCACTGACCATCAACACCCG
rpsT-RT-F	TTGTGCTGCTTCTTTGTCGC	qPCR primers, coding region of gene rpsT
rpsT-RT-R	TAAGAAACGCGCCGTACAGT
rplQ-RT-F	ACGATTAGCTACGCTGTCGG	qPCR primers, coding region of gene rplQ
rplQ-RT-R	ATCATCAAGACGACCCTGCC
rpmH-RT-F	AAACAGTCAGACGAGCACGG	qPCR primers, coding region of gene rpmH
rpmH-RT-R	GTCCGTATTGAAGCGCAACC
Hem-RT-F	GACGGGCTGTACAACATCGAA	qPCR primers, coding region of gene Hem
Hem-RT-R	ATCTCGCTGGAGCCTTTGC
hldE-RT-F	CGGCGTTTTTCAACTGTGCT	qPCR primers, coding region of gene hldE
hldE-RT-R	TCCTGCTTCCTTGCTAACGC
16S rRNA-RT-F	CACACCGCCCGTCACACCA	qPCR primers, coding region of gene 16S rRNA
16S rRNA-RT-R	CGCAGGTTCCCCTACGGTTAC
8F	AGAGTTTGATCMTGGCTCAG	PCR primers, coding region of gene 16S rRNA
1492R	GGMTACCTTGTTACGACTT
515F	GTGCCAGCMGCCGCGGTAA	PCR primers, V4 coding region of gene 16S rRNA
806R	GGACTACHVGGGTWTCTAAT
