# Supplementary material for: Hosts manipulate lifestyle switch and pathogenicity heterogeneity of opportunistic pathogens in the single-cell resolution
Source: eLife. 2024 Aug 27;13:RP96789. doi: 10.7554/eLife.96789 (PMC11349298; doi:10.7554/eLife.96789)
Supplement: Supplementary file 2. [file elife-96789-supp2.xlsx]

## Sheet: down genes
ID	biotype	symbol	Larvae1	Larvae2	Larvae3	Larvae4	Larvae5	Control1	Control2	Control3	Control4	Larvae	Control	log2FoldChange	pvalue	padj
HMJ22_RS00065	CDS		38.8088	48.5513	31.8485	61.8041	53.6077	247.037	352.923	241.051	261.509	46.9241	275.63	-2.53867	1.20207e-27	1.09832e-25
HMJ22_RS00090	CDS		86.5736	105.194	45.6957	89.9593	97.9234	170.274	172.505	243.904	247.266	85.0693	208.487	-1.32361	4.50256e-08	4.88793e-07
HMJ22_RS00095	CDS		187.327	186.113	105.239	196.4	182.981	314.728	419.393	456.428	512.763	171.612	425.828	-1.31513	2.14601e-09	2.88378e-08
HMJ22_RS00100	CDS		220.912	242.756	121.855	180.605	174.404	573.628	780.23	577.667	565.179	188.107	624.176	-1.76714	4.41125e-18	2.01218e-16
HMJ22_RS00145	CDS		520.934	420.778	404.338	667.484	618.275	2576.44	2396.87	2293.55	2390.61	526.362	2414.37	-2.1757	1.38675e-36	2.46246e-34
HMJ22_RS00150	CDS		149.265	145.654	72.0053	117.428	98.6381	364.973	477.95	307.376	366.341	116.598	379.16	-1.73395	3.94921e-14	1.06138e-12
HMJ22_RS00175	CDS		315.695	210.389	294.945	541.129	436.009	942.788	852.239	1059.06	1067.12	359.633	980.3	-1.41236	1.42807e-09	1.99448e-08
HMJ22_RS00520	CDS		952.309	784.913	756.056	740.276	685.464	3078.19	2669.08	3059.5	3164.32	783.804	2992.77	-1.93288	3.03432e-45	8.8745e-43
HMJ22_RS00760	CDS	glpQ	176.879	178.021	96.9303	116.741	130.803	322.404	353.715	270.291	275.183	139.875	305.398	-1.16684	1.45413e-08	1.73797e-07
HMJ22_RS00765	CDS	glpT	403.015	453.145	427.878	351.597	400.986	1104.69	1025.54	775.928	904.172	407.324	952.581	-1.24245	2.03517e-16	7.38603e-15
HMJ22_RS00770	CDS	glpA	84.3346	56.6432	72.0053	123.608	107.215	224.008	231.853	159.037	165.793	88.7613	195.173	-1.05882	5.50604e-06	3.97907e-05
HMJ22_RS00810	CDS		9529.81	11433.8	4471.25	6258.01	6959.71	24695.3	28942.1	26698.2	26078.5	7730.52	26603.5	-1.7849	1.92988e-13	4.82178e-12
HMJ22_RS00815	CDS		82.0956	48.5513	37.3874	123.608	88.6314	316.123	341.054	330.911	363.492	76.0548	337.895	-2.07374	7.41586e-14	1.96126e-12
HMJ22_RS00935	CDS		102.993	32.3675	112.162	113.308	127.944	302.167	208.905	218.943	242.138	97.7547	243.038	-1.1951	6.02583e-08	6.36103e-07
HMJ22_RS00945	CDS	metR	42.5405	24.2756	63.697	75.5384	66.4735	184.929	158.262	128.37	94.0065	54.505	141.392	-1.26859	5.00081e-06	3.67268e-05
HMJ22_RS01040	CDS	fadA	525.412	372.227	285.252	405.847	372.395	839.507	972.517	932.112	987.353	392.226	932.872	-1.2406	7.07704e-12	1.36915e-10
HMJ22_RS01110	CDS		245.541	121.378	211.862	232.109	226.582	503.844	491.402	455.715	455.219	207.494	476.545	-1.12238	4.18878e-13	9.87044e-12
HMJ22_RS01305	CDS	actP	115.68	137.562	76.1595	73.4782	72.9065	210.749	219.984	238.199	252.393	95.1573	230.331	-1.36889	4.93421e-11	8.51783e-10
HMJ22_RS01310	CDS		14.9265	8.09188	6.92359	8.24055	6.43292	27.2159	22.9479	32.0926	37.6026	8.92308	29.9648	-1.70507	5.1384e-06	3.74606e-05
HMJ22_RS01315	CDS	acs	812.747	720.178	682.666	532.889	659.017	1725.77	1666.49	1872.07	2010.6	681.499	1818.73	-1.42208	5.31384e-21	3.10828e-19
HMJ22_RS01380	CDS		33.5846	40.4594	44.311	22.6615	24.3022	50.2448	66.4699	82.7277	79.1934	33.0637	69.6589	-1.16514	2.92818e-05	0.000178418
HMJ22_RS01450	CDS	groL	14479.4	13222.1	6257.54	8829.06	8650.14	17889.9	22008.6	26590.5	26375.4	10287.7	23216.1	-1.17501	1.96971e-06	1.60548e-05
HMJ22_RS01630	CDS		147.026	129.47	92.7761	171.678	125.085	320.311	350.549	340.182	333.866	133.207	336.227	-1.31711	1.08994e-12	2.40852e-11
HMJ22_RS02010	CDS		68.6618	97.1026	80.3136	142.149	122.226	213.54	235.81	199.687	181.746	102.091	207.696	-1.00637	1.85324e-05	0.000118589
HMJ22_RS02085	CDS	nrdD	315.695	356.043	240.941	269.191	232.3	737.621	752.534	479.25	485.415	282.834	613.705	-1.14545	3.10557e-08	3.50133e-07
HMJ22_RS02115	CDS	mgtA	3489.81	3099.19	3004.84	4207.49	4061.32	7861.22	8430.59	10326.7	11541.2	3572.53	9539.91	-1.41436	1.08986e-16	4.16829e-15
HMJ22_RS02125	CDS		124.636	80.9188	113.547	78.2852	87.2018	301.469	379.828	284.555	325.889	96.9178	322.935	-1.70912	1.79388e-18	8.57615e-17
HMJ22_RS02130	CDS		178.371	242.756	124.625	120.175	106.501	1026.53	1270.05	932.112	930.949	154.486	1039.91	-2.83918	2.70954e-36	4.64546e-34
HMJ22_RS02135	CDS		180.61	89.0107	101.084	129.789	110.074	538.736	597.437	608.334	594.805	122.114	584.828	-2.20227	1.20273e-28	1.19599e-26
HMJ22_RS02160	CDS		391.82	218.481	272.789	304.9	294.485	585.491	713.76	559.838	578.283	296.495	609.343	-1.00073	6.26618e-09	7.86753e-08
HMJ22_RS02180	CDS		5.22427	0	12.4625	10.3007	6.43292	13.259	20.574	27.1004	21.0803	6.88407	20.5034	-1.36792	0.00122646	0.00456094
HMJ22_RS02265	CDS	ascF	17.1655	8.09188	18.0013	21.2881	12.8658	43.9642	34.0262	37.0848	33.6145	15.4825	37.1724	-1.13806	9.80148e-05	0.000512979
HMJ22_RS02295	CDS	sfnG	2.9853	0	4.15415	4.12027	5.00338	15.3526	18.2001	8.55803	14.2434	3.25262	14.0885	-1.845	0.000302208	0.00136227
HMJ22_RS02450	CDS		14.1802	32.3675	36.0027	35.0223	30.7351	43.2663	65.6786	73.4565	74.6355	29.6616	64.2592	-1.15161	0.000186903	0.00090554
HMJ22_RS02460	CDS		11.9412	16.1838	6.92359	9.61397	17.1545	62.1081	57.7655	64.8984	64.3802	12.3634	62.2881	-2.37799	2.19139e-16	7.89537e-15
HMJ22_RS02465	CDS		17.1655	40.4594	15.2319	23.3482	21.4431	94.209	95.7483	91.2857	95.7157	23.5296	94.2397	-2.19745	3.11016e-20	1.7375e-18
HMJ22_RS02480	CDS		286.588	161.838	209.092	209.447	235.159	489.189	669.446	496.366	484.276	220.425	534.819	-1.23635	1.7769e-11	3.28429e-10
HMJ22_RS02500	CDS		1.49265	8.09188	6.92359	6.18041	6.43292	18.8418	14.2435	17.8292	27.3474	5.82429	19.5655	-1.90561	5.16571e-05	0.000293866
HMJ22_RS02510	CDS		125.382	145.654	84.4678	87.8992	85.0575	297.979	215.236	211.811	192.571	105.692	229.399	-1.18785	5.45199e-08	5.85471e-07
HMJ22_RS02525	CDS		10.4485	0	16.6166	10.3007	9.292	32.1008	27.6958	29.9531	29.6263	9.33157	29.844	-1.47222	7.4624e-06	5.25539e-05
HMJ22_RS02555	CDS		11.1949	8.09188	2.76944	13.7342	9.292	34.8922	36.4002	46.356	37.6026	9.01648	38.8127	-1.99001	9.73563e-09	1.18933e-07
HMJ22_RS02565	CDS	hpaE	10.4485	32.3675	8.30831	13.7342	12.1511	57.2232	49.0611	52.0614	56.9736	15.4019	53.8298	-2.13406	1.81436e-12	3.80632e-11
HMJ22_RS02570	CDS	hpaD	13.4338	0	8.30831	15.1077	6.43292	27.2159	25.3219	21.3951	22.7895	8.65655	24.1806	-1.20241	0.00173663	0.00615873
HMJ22_RS02625	CDS		8.95589	0	2.76944	9.61397	6.43292	20.9353	26.9045	20.6819	28.4868	5.55444	24.2521	-1.79165	1.55816e-05	0.000101271
HMJ22_RS02705	CDS		40.3015	40.4594	23.5402	73.4782	57.1815	97.0003	102.87	99.1306	106.541	46.9922	101.385	-1.05309	0.00016406	0.000806033
HMJ22_RS02755	CDS		144.041	153.746	174.474	221.121	184.41	396.376	317.314	514.195	550.365	175.559	444.563	-1.32212	5.35034e-10	7.98856e-09
HMJ22_RS02995	CDS		70.1544	40.4594	92.7761	180.605	128.658	189.116	224.731	288.12	306.518	102.531	252.121	-1.22105	9.4877e-05	0.000498129
HMJ22_RS03105	CDS	ilvN	80.603	64.7351	77.5442	36.3958	39.3123	111.655	163.009	132.65	135.597	59.7181	135.728	-1.21571	1.24581e-05	8.2589e-05
HMJ22_RS03110	CDS	ilvB	939.622	598.799	635.586	412.027	475.322	1945.59	2473.63	2137.37	2370.1	612.271	2231.67	-1.86516	7.50297e-16	2.55512e-14
HMJ22_RS03165	CDS	leuB	553.772	339.859	310.177	500.613	410.278	939.996	1091.21	1221.66	1253.42	422.94	1126.57	-1.39272	1.59763e-12	3.40918e-11
HMJ22_RS03185	CDS		200.761	202.297	170.32	181.979	209.427	399.167	394.071	374.414	416.477	192.957	396.032	-1.04292	1.5397e-15	4.97102e-14
HMJ22_RS03440	CDS		32.0919	40.4594	24.9249	50.8167	39.3123	114.446	94.9569	123.378	90.5881	37.5211	105.842	-1.48766	6.69808e-10	9.88215e-09
HMJ22_RS03445	CDS		7.46324	8.09188	1.38472	8.24055	4.28862	60.7124	55.3916	59.9062	62.671	5.8938	59.6703	-3.34752	2.66226e-21	1.59479e-19
HMJ22_RS03450	CDS	hutH	33.5846	40.4594	12.4625	28.8419	27.876	667.837	762.821	688.922	701.915	28.6449	705.374	-4.68646	1.04863e-116	2.60688e-113
HMJ22_RS03455	CDS	hutU	93.2905	89.0107	45.6957	47.3832	37.168	1652.5	1992.51	1489.1	1609.51	62.5096	1685.9	-4.83525	8.10775e-75	1.00779e-71
HMJ22_RS03460	CDS		38.0625	0	31.8485	35.709	27.1612	381.023	379.036	382.259	419.326	26.5563	390.411	-3.62364	5.18777e-64	3.2242e-61
HMJ22_RS03530	CDS		471.677	582.616	447.264	267.131	306.636	1015.36	864.9	817.292	814.723	415.065	878.07	-1.11455	4.91585e-07	4.45202e-06
HMJ22_RS03600	CDS		45.5258	72.8269	47.0804	32.2755	62.1849	66.2952	83.8786	132.65	110.529	51.9787	98.3381	-1.00798	0.000387471	0.00167231
HMJ22_RS03605	CDS	chbC	71.6471	80.9188	60.9276	77.5985	72.1917	172.368	171.714	246.043	227.325	72.6567	204.362	-1.51128	6.34074e-15	1.91068e-13
HMJ22_RS03800	CDS	clpB	7036.34	7509.27	3904.9	4578.31	4676.73	11710.5	11802.4	14523.7	14507.8	5541.11	13136.1	-1.24784	5.87458e-09	7.39454e-08
HMJ22_RS03890	CDS	hpxZ	4.47794	8.09188	8.30831	8.92726	5.71815	66.2952	36.4002	57.0536	50.7065	7.10471	52.6139	-2.95528	1.29378e-15	4.26005e-14
HMJ22_RS03895	CDS		33.5846	56.6432	18.0013	13.0475	22.1578	115.144	113.948	101.983	135.028	28.6869	116.526	-2.27931	1.58766e-13	3.9933e-12
HMJ22_RS03935	CDS		32.0919	8.09188	36.0027	43.2629	36.4532	143.058	149.557	183.285	197.129	31.1805	168.257	-2.24896	3.31232e-22	2.16696e-20
HMJ22_RS03940	CDS	hpxK	36.5699	24.2756	41.5415	38.4559	37.168	117.238	181.21	134.076	132.179	35.6022	141.176	-1.91078	2.09933e-18	9.94082e-17
HMJ22_RS03955	CDS		71.6471	24.2756	78.9289	78.2852	62.8997	169.576	186.749	126.231	118.505	63.2073	150.265	-1.12623	1.47295e-06	1.22672e-05
HMJ22_RS03960	CDS	mtnC	47.7647	40.4594	48.4651	100.947	60.7554	137.475	126.609	157.61	154.399	59.6783	144.023	-1.19487	4.16636e-06	3.1578e-05
HMJ22_RS04145	CDS		66.4228	56.6432	87.2372	44.6363	82.1985	180.044	227.897	213.238	232.452	67.4276	213.408	-1.6422	8.80947e-14	2.29323e-12
HMJ22_RS04240	CDS		134.338	129.47	84.4678	116.054	119.366	455.692	580.029	435.033	476.3	116.739	486.764	-2.07047	1.13356e-31	1.48317e-29
HMJ22_RS04250	CDS	ada	76.8714	56.6432	63.697	86.5258	80.0541	209.353	223.94	175.44	175.479	72.7583	196.053	-1.36305	8.24331e-14	2.16856e-12
HMJ22_RS04255	CDS		19.4044	8.09188	11.0777	19.2279	16.4397	39.7771	60.1394	53.4877	39.8816	14.8483	48.3214	-1.54179	3.1631e-07	2.96735e-06
HMJ22_RS04270	CDS		151.504	202.297	155.088	160.004	162.967	368.462	337.888	311.655	352.667	166.372	342.668	-1.09214	2.01971e-15	6.35571e-14
HMJ22_RS04315	CDS		114.934	121.378	92.7761	135.282	104.356	284.023	274.584	243.904	247.835	113.745	262.586	-1.211	1.21447e-13	3.08078e-12
HMJ22_RS04370	CDS		122.397	153.746	94.1608	125.668	106.501	279.138	323.645	247.47	254.672	120.495	276.231	-1.24903	3.58461e-13	8.65178e-12
HMJ22_RS04540	CDS	ggt	573.177	445.054	440.34	551.43	545.369	1163.31	1326.23	999.864	1138.33	511.074	1156.93	-1.16015	1.4686e-15	4.77248e-14
HMJ22_RS04800	CDS		4525.71	5000.78	3607.19	4173.15	4084.91	10300.9	11102.8	7463.32	7573.51	4278.35	9110.14	-1.09278	1.13932e-10	1.86954e-09
HMJ22_RS04925	CDS		61.9449	64.7351	62.3123	65.2377	48.6043	210.051	210.488	241.051	255.812	60.5668	229.35	-1.94425	7.80282e-28	7.31993e-26
HMJ22_RS04935	CDS		48.5111	72.8269	23.5402	80.3453	60.7554	98.396	116.322	115.533	127.051	57.1958	114.326	-1.03052	0.000269177	0.00123123
HMJ22_RS05355	CDS	gltK	150.011	113.286	95.5455	99.5733	133.662	231.684	201.784	285.981	290.566	118.416	252.504	-1.0787	1.37476e-07	1.3698e-06
HMJ22_RS05465	CDS	nagE	2365.85	1812.58	1674.12	2229.07	1981.34	4092.86	3880.57	5446.47	5934.95	2012.59	4838.71	-1.26233	1.438e-12	3.12216e-11
HMJ22_RS05560	CDS		1246.36	1019.58	1775.21	3493.99	2452.37	6261.06	1854.83	5337.36	4839.34	1997.5	4573.15	-1.19154	0.00154668	0.00555642
HMJ22_RS05630	CDS	sdhD	50.75	56.6432	33.2332	70.7314	48.6043	158.411	97.3309	251.036	230.174	51.9924	184.238	-1.82983	3.53233e-09	4.57363e-08
HMJ22_RS05675	CDS	cydB	1980	1618.38	1507.96	2853.29	2646.79	3950.5	4732.81	4575.7	4802.88	2121.28	4515.47	-1.08449	1.92e-07	1.87182e-06
HMJ22_RS05825	CDS	galK	5.22427	0	0	5.4937	2.14431	17.4461	14.2435	18.5424	13.6737	2.57245	15.9764	-2.2304	3.98789e-05	0.000232448
HMJ22_RS05830	CDS	galT	12.6875	8.09188	8.30831	7.55384	9.292	33.4965	26.9045	23.5346	23.9289	9.18671	26.9661	-1.50666	1.6449e-05	0.000106351
HMJ22_RS05980	CDS	moaB	33.5846	80.9188	16.6166	36.3958	20.7283	62.1081	66.4699	60.6194	61.5315	37.6488	62.6822	-1.0011	0.00177125	0.00625918
HMJ22_RS06035	CDS		579.147	436.962	555.272	955.904	777.669	1084.45	1414.86	1491.24	1669.33	660.991	1414.97	-1.08035	2.23383e-06	1.8001e-05
HMJ22_RS06075	CDS		21.6434	8.09188	23.5402	14.421	13.5806	50.2448	94.1656	34.2321	42.1605	16.2554	55.2008	-1.66431	7.99391e-06	5.57444e-05
HMJ22_RS06125	CDS		52.989	89.0107	31.8485	43.9496	41.4566	119.331	158.262	165.455	144.143	51.8509	146.798	-1.66993	9.3782e-13	2.08163e-11
HMJ22_RS06130	CDS		67.9155	113.286	26.3096	56.3104	45.7452	122.821	141.644	134.789	150.98	61.9134	137.558	-1.31076	2.56966e-06	2.03122e-05
HMJ22_RS06145	CDS		82.0956	32.3675	66.4665	77.5985	85.7723	154.224	163.009	152.618	145.853	68.8601	153.926	-1.02721	4.15157e-08	4.52666e-07
HMJ22_RS06160	CDS		61.9449	32.3675	33.2332	66.6111	64.3292	293.792	302.28	253.175	299.112	51.6972	287.09	-2.35896	2.12396e-27	1.88577e-25
HMJ22_RS06180	CDS		23.8824	16.1838	20.7708	24.0349	20.0135	47.4534	64.0959	39.9375	44.4394	20.9771	48.9816	-1.15074	1.78576e-05	0.000114713
HMJ22_RS06190	CDS		1279.95	784.913	1111.93	1831.46	1552.48	4637.17	5194.15	4138.52	4324.3	1312.15	4573.54	-1.78917	2.72371e-16	9.67307e-15
HMJ22_RS06235	CDS		17.1655	0	29.0791	36.3958	30.7351	59.3168	62.5133	63.4721	57.5434	22.6751	60.7114	-1.18878	5.48737e-05	0.000310389
HMJ22_RS06245	CDS		59.7059	32.3675	52.6193	64.551	45.7452	113.051	95.7483	99.8437	133.318	50.9978	110.49	-1.02767	1.74119e-06	1.43094e-05
HMJ22_RS06285	CDS		9.70221	0	8.30831	15.7944	10.7215	27.9138	22.1566	23.5346	25.6381	8.90529	24.8108	-1.19122	0.00100907	0.00384747
HMJ22_RS06295	CDS		34.3309	24.2756	18.0013	18.5412	31.4498	42.5685	69.6351	55.6272	51.846	25.3198	54.9192	-1.08243	0.000180294	0.000876266
HMJ22_RS06325	CDS	lsrK	102.993	137.562	94.1608	157.944	119.366	361.483	342.636	358.011	389.13	122.405	362.815	-1.58318	1.70642e-18	8.31798e-17
HMJ22_RS06335	CDS		89.5589	48.5513	85.8525	164.124	124.37	260.296	310.193	348.74	325.889	102.491	311.279	-1.51237	1.43644e-09	1.99497e-08
HMJ22_RS06385	CDS		42.5405	80.9188	45.6957	80.3453	50.0338	138.871	114.74	167.595	181.176	59.9068	150.595	-1.39882	3.46152e-08	3.86757e-07
HMJ22_RS06395	CDS		26.1213	16.1838	37.3874	46.6964	47.1748	129.101	79.1308	83.4408	76.9144	34.7127	92.1468	-1.28578	5.71649e-06	4.12517e-05
HMJ22_RS06440	CDS		71.6471	32.3675	66.4665	116.054	97.2086	209.353	238.975	254.601	268.916	76.7488	242.961	-1.54372	6.19892e-11	1.04833e-09
HMJ22_RS06480	CDS		248.526	242.756	234.017	276.745	267.324	561.765	682.899	529.172	532.134	253.874	576.492	-1.17082	1.83048e-16	6.7919e-15
HMJ22_RS06485	CDS	atzF	203.746	169.93	103.854	114.681	100.782	592.47	800.804	816.579	1013.56	138.599	805.853	-2.56785	2.35491e-24	1.77403e-22
HMJ22_RS06490	CDS	uca	115.68	113.286	40.1568	72.1048	76.4803	3182.17	3697.78	5340.93	5847.78	83.5417	4517.16	-5.80309	9.73498e-91	1.61341e-87
HMJ22_RS06495	CDS		16.4191	8.09188	0	3.43356	2.85908	574.326	689.229	868.64	720.717	6.16073	713.228	-6.87875	1.40057e-22	9.28484e-21
HMJ22_RS06500	CDS	urtA	20.1507	32.3675	4.15415	21.9748	30.7351	2498.98	2750.59	3475.27	3690.18	21.8765	3103.76	-7.21349	7.61348e-135	3.78542e-131
HMJ22_RS06505	CDS	urtB	5.97059	0	5.53887	15.7944	7.14769	706.916	705.055	1429.9	1599.82	6.89031	1110.42	-7.03569	6.36063e-66	4.51787e-63
HMJ22_RS06510	CDS	urtC	8.95589	0	2.76944	4.12027	6.43292	429.872	564.994	769.51	824.409	4.4557	647.196	-6.84584	1.49031e-73	1.48197e-70
HMJ22_RS06515	CDS	urtD	6.71692	24.2756	2.76944	2.74685	5.71815	263.087	299.906	392.243	402.234	8.4454	339.368	-5.99861	4.24047e-54	1.91669e-51
HMJ22_RS06520	CDS	urtE	28.3603	48.5513	9.69303	39.1426	27.1612	196.792	149.557	284.555	293.984	30.5817	231.222	-3.02333	3.7202e-20	2.05521e-18
HMJ22_RS06525	CDS		17.9118	24.2756	15.2319	25.4084	33.5942	50.2448	44.3132	79.875	88.3092	23.2844	65.6855	-1.48561	5.35442e-06	3.88645e-05
HMJ22_RS06590	CDS		57.4669	64.7351	30.4638	54.937	43.6009	108.864	124.235	124.805	140.155	50.2407	124.515	-1.35887	3.17917e-10	4.92424e-09
HMJ22_RS06595	CDS		92.5442	105.194	47.0804	116.054	85.0575	254.015	327.601	239.625	238.72	89.1862	264.99	-1.58709	3.08771e-11	5.50254e-10
HMJ22_RS06645	CDS		167.177	72.8269	114.932	235.542	155.82	376.138	455.793	422.196	382.293	149.259	409.105	-1.37935	1.03349e-08	1.25329e-07
HMJ22_RS06745	CDS	prpB	69.4081	48.5513	27.6944	67.9845	67.1883	475.232	616.429	516.335	568.597	56.1653	544.148	-3.21709	6.43764e-43	1.68463e-40
HMJ22_RS06750	CDS	prpC	94.7831	32.3675	31.8485	63.8642	69.3326	403.354	415.437	407.933	369.189	58.4392	398.978	-2.66347	2.42735e-24	1.77482e-22
HMJ22_RS06755	CDS		31.3456	56.6432	29.0791	48.0699	36.4532	153.526	170.923	178.292	183.455	40.3182	171.549	-2.18163	1.53791e-25	1.21373e-23
HMJ22_RS06810	CDS		145.533	202.297	160.627	153.137	174.404	353.807	410.689	275.283	298.542	167.2	334.58	-1.03996	3.04963e-09	4.00073e-08
HMJ22_RS06915	CDS		23.136	0	31.8485	21.2881	15.7249	40.475	56.1829	54.2009	47.8579	18.3995	49.6791	-1.22656	2.91481e-05	0.000178004
HMJ22_RS07020	CDS		150.757	169.93	91.3914	248.59	155.105	318.217	440.759	427.902	453.51	163.155	410.097	-1.32665	2.03106e-07	1.97621e-06
HMJ22_RS07155	CDS		9.70221	16.1838	11.0777	12.3608	16.4397	125.612	125.818	134.076	148.131	13.1528	133.409	-3.39685	6.74362e-40	1.52406e-37
HMJ22_RS07175	CDS	moeB	19.4044	24.2756	12.4625	19.9147	22.8726	45.3599	37.1915	42.077	35.8934	19.786	40.1304	-1.04711	0.000110041	0.000565793
HMJ22_RS07195	CDS		63.4375	0	30.4638	63.8642	67.1883	90.0219	128.192	107.689	100.843	44.9908	106.686	-1.05287	0.000942362	0.00362368
HMJ22_RS07200	CDS	gsiB	247.033	202.297	178.629	287.046	263.75	513.613	549.168	480.676	528.715	235.751	518.043	-1.10459	2.48438e-11	4.47548e-10
HMJ22_RS07255	CDS	galS	32.8383	40.4594	22.1555	36.3958	17.1545	100.49	71.2177	101.27	109.959	29.8007	95.7341	-1.76495	1.47225e-10	2.39217e-09
HMJ22_RS07260	CDS	mglB	807.522	1092.4	393.26	359.837	450.305	1773.92	1788.36	1433.47	1429.47	620.666	1606.3	-1.39564	4.25541e-06	3.2094e-05
HMJ22_RS07265	CDS	mglA	60.4522	48.5513	20.7708	43.9496	31.4498	169.576	149.557	161.176	152.689	41.0347	158.25	-1.96259	2.72416e-14	7.52474e-13
HMJ22_RS07440	CDS		18124.5	19647.1	9729.03	18224.7	20410.9	49166.6	50366	46495.8	48323.3	17227.2	48587.9	-1.49618	2.71623e-13	6.68568e-12
HMJ22_RS07550	CDS		345.548	291.308	379.413	545.936	424.573	827.643	966.978	800.176	836.943	397.356	857.935	-1.08053	2.28902e-09	3.05941e-08
HMJ22_RS07715	CDS		10.4485	16.1838	4.15415	15.1077	10.0068	20.2375	34.8175	26.3873	29.0566	11.1802	27.6247	-1.36902	0.000177065	0.000863105
HMJ22_RS07735	CDS		29.1066	80.9188	40.1568	28.1552	45.0305	88.6262	38.7741	115.533	97.9947	44.6736	85.2321	-1.10106	0.0017146	0.00608493
HMJ22_RS07770	CDS	potF	1960.59	2314.28	1330.71	1050.67	1175.8	5301.52	4999.48	5226.11	5259.81	1566.41	5196.73	-1.7409	2.97195e-14	8.16382e-13
HMJ22_RS07785	CDS	potI	57.4669	72.8269	31.8485	79.6586	83.628	129.799	114.74	144.773	132.179	65.0858	130.373	-1.00408	7.1204e-05	0.000387337
HMJ22_RS07860	CDS	poxB	298.53	372.227	206.323	211.507	263.75	563.858	581.611	504.924	573.725	270.467	556.03	-1.09192	7.17748e-10	1.0527e-08
HMJ22_RS07885	CDS		1265.02	1221.87	893.143	999.166	846.287	1999.32	1695.77	2333.49	2439.04	1045.1	2116.91	-1.02667	7.91214e-09	9.81027e-08
HMJ22_RS07910	CDS	clpA	6119.11	5672.41	4246.93	6045.13	5446.54	12877.3	13582.8	13669.3	13735.2	5506.02	13466.2	-1.29042	7.14058e-22	4.49405e-20
HMJ22_RS07995	CDS	ansB	237.331	226.573	175.859	196.4	205.854	491.98	571.324	440.026	458.638	208.403	490.492	-1.24583	4.42241e-16	1.55945e-14
HMJ22_RS08040	CDS		210.463	226.573	135.702	171.678	159.394	578.513	512.768	551.993	583.41	180.762	556.671	-1.6653	2.58747e-24	1.86448e-22
HMJ22_RS08070	CDS		82.842	89.0107	88.622	123.608	82.1985	277.044	240.558	197.548	201.687	93.2563	229.209	-1.28302	1.9323e-10	3.06199e-09
HMJ22_RS08375	CDS	wrbA	398.537	469.329	340.641	372.198	355.24	1218.44	1004.96	674.658	690.521	387.189	897.144	-1.23035	3.17495e-09	4.13242e-08
HMJ22_RS08390	CDS		73.8861	64.7351	62.3123	85.1523	65.044	131.195	193.87	131.936	143.574	70.226	150.144	-1.0678	1.72983e-07	1.69639e-06
HMJ22_RS08470	CDS		276.886	250.848	353.103	304.9	363.818	699.938	714.551	789.479	705.904	309.911	727.468	-1.20226	2.80413e-17	1.16185e-15
HMJ22_RS08480	CDS		250.765	186.113	185.552	278.805	278.045	607.822	729.586	697.48	763.447	235.856	699.584	-1.52889	3.39946e-19	1.76064e-17
HMJ22_RS08595	CDS		128.368	161.838	130.163	224.555	197.276	372.649	322.062	489.234	462.056	168.44	411.5	-1.2778	1.17874e-08	1.4225e-07
HMJ22_RS08685	CDS		93.2905	113.286	83.0831	118.801	107.215	185.627	227.105	213.951	201.117	103.135	206.95	-1.01515	1.4762e-09	2.03315e-08
HMJ22_RS09160	CDS		445.555	291.308	310.177	469.025	441.727	882.075	1029.49	893.601	982.226	391.558	946.848	-1.2401	2.8056e-13	6.83795e-12
HMJ22_RS09165	CDS		23.8824	0	23.5402	17.8545	20.0135	54.4319	59.3481	58.4799	63.8105	17.0581	59.0176	-1.5507	3.75328e-09	4.83077e-08
HMJ22_RS09190	CDS	lhgO	12.6875	24.2756	8.30831	19.9147	13.5806	45.3599	41.9393	43.5033	41.5908	15.7533	43.0983	-1.56599	8.89795e-08	9.10301e-07
HMJ22_RS09200	CDS		47.0184	40.4594	23.5402	30.9021	22.1578	98.396	113.948	85.5803	82.6118	32.8156	95.1341	-1.57723	2.97994e-09	3.93004e-08
HMJ22_RS09205	CDS		50.0037	48.5513	62.3123	81.7188	57.1815	138.173	94.9569	128.37	144.713	59.9535	126.553	-1.03571	4.28397e-06	3.22238e-05
HMJ22_RS09225	CDS	ygjK	11.1949	24.2756	15.2319	19.9147	10.7215	23.0289	36.4002	31.3795	33.0447	16.2677	30.9633	-1.07222	0.00113945	0.00427573
HMJ22_RS09240	CDS	ebgA	16.4191	8.09188	12.4625	23.3482	12.8658	35.5901	28.4871	29.2399	39.3118	14.6375	33.1572	-1.04102	0.00111823	0.00421841
HMJ22_RS09260	CDS		31.3456	24.2756	49.8498	39.1426	22.1578	62.806	121.07	52.7745	45.5789	33.3543	70.5574	-1.04026	0.00305782	0.00992395
HMJ22_RS09455	CDS		21.6434	40.4594	26.3096	25.4084	30.0203	60.0146	60.9307	49.9219	59.8223	28.7682	57.6724	-1.12166	2.66153e-06	2.09385e-05
HMJ22_RS09545	CDS		107.471	32.3675	132.933	192.966	150.816	377.534	451.837	395.809	425.593	123.311	412.693	-1.64205	2.11551e-10	3.32859e-09
HMJ22_RS09575	CDS		26.1213	40.4594	31.8485	34.3356	25.0169	77.4607	101.287	91.2857	101.413	31.5564	92.8617	-1.64428	3.77259e-13	9.01794e-12
HMJ22_RS09625	CDS		2135.98	1391.8	2126.93	4025.51	2699.68	17266.1	7177.16	13681.4	11890.4	2475.98	12503.8	-2.33242	1.34745e-14	3.9642e-13
HMJ22_RS09650	CDS		153.743	113.286	173.09	208.761	196.562	323.8	500.898	332.337	331.587	169.088	372.155	-1.0858	1.41797e-07	1.41003e-06
HMJ22_RS09660	CDS		95.5295	56.6432	78.9289	97.5131	83.628	381.023	375.871	293.113	297.402	82.4485	336.852	-1.95165	6.95314e-27	6.06509e-25
HMJ22_RS09665	CDS		14.1802	8.09188	16.6166	26.0951	15.7249	140.965	182.792	174.013	149.841	16.1417	161.903	-3.17438	6.87959e-35	1.1034e-32
HMJ22_RS09670	CDS		33.5846	16.1838	29.0791	37.0825	37.168	145.152	150.349	203.253	192.571	30.6196	172.831	-2.36229	6.80877e-26	5.46019e-24
HMJ22_RS09705	CDS		235.092	234.665	152.319	178.545	196.562	544.319	428.889	343.748	304.809	199.436	405.441	-1.04306	1.37536e-06	1.15317e-05
HMJ22_RS09715	CDS		232.107	137.562	94.1608	173.052	160.823	601.542	615.638	745.975	846.628	159.541	702.446	-2.11221	1.54194e-18	7.59063e-17
HMJ22_RS09720	CDS	puuC	328.383	323.675	130.163	210.821	208.713	495.469	663.116	744.549	753.192	240.351	664.081	-1.49451	7.57493e-09	9.41564e-08
HMJ22_RS09740	CDS		173.147	161.838	51.2346	96.1397	78.6246	193.303	245.305	257.454	284.868	112.197	245.233	-1.17691	0.000138963	0.000695796
HMJ22_RS09780	CDS	hutG	46.2721	48.5513	15.2319	24.7216	25.0169	235.871	282.497	213.238	234.731	31.9588	241.584	-3.02415	3.27812e-29	3.62196e-27
HMJ22_RS09785	CDS	hutI	55.9743	56.6432	59.5429	49.4433	37.8828	397.771	507.228	341.608	374.317	51.8973	405.231	-3.00137	2.56522e-47	9.1102e-45
HMJ22_RS09790	CDS	hutC	225.39	72.8269	214.631	238.976	227.297	742.506	705.055	508.49	480.858	195.824	609.227	-1.5668	7.93054e-11	1.32318e-09
HMJ22_RS09795	CDS		83.5883	24.2756	73.3901	72.1048	63.6145	424.987	444.715	443.591	481.997	63.3946	448.823	-2.67954	2.83694e-50	1.08502e-47
HMJ22_RS09800	CDS		14.1802	0	5.53887	10.3007	15.0102	74.6693	109.2	89.8593	94.0065	9.00597	91.9339	-3.02789	1.17347e-21	7.29313e-20
HMJ22_RS09810	CDS		18.6581	8.09188	5.53887	16.4811	15.0102	36.9857	45.1046	39.9375	55.8342	12.756	44.4655	-1.64654	5.77197e-07	5.17085e-06
HMJ22_RS09815	CDS		10.4485	8.09188	13.8472	7.55384	16.4397	60.7124	60.9307	55.6272	66.0894	11.2762	60.84	-2.37489	9.53852e-16	3.1617e-14
HMJ22_RS09910	CDS		139.563	89.0107	74.7748	120.175	85.0575	296.584	351.341	271.718	232.452	101.716	288.024	-1.46796	8.67746e-11	1.43814e-09
HMJ22_RS09915	CDS		1475.48	1577.92	947.147	922.941	1038.56	3441.77	3973.95	2205.12	2292.05	1192.41	2978.22	-1.32875	3.27532e-08	3.67605e-07
HMJ22_RS10060	CDS		786.625	857.74	761.595	769.805	647.581	2679.02	3192.93	2185.15	2273.25	764.669	2582.59	-1.76598	1.35529e-29	1.53147e-27
HMJ22_RS10065	CDS		17.9118	0	12.4625	13.0475	7.86246	23.0289	31.6523	25.6741	23.3592	10.2568	25.9286	-1.08318	0.00290408	0.00952808
HMJ22_RS10070	CDS	yfeC	16.4191	16.1838	6.92359	14.421	17.1545	35.5901	49.0611	25.6741	27.9171	14.2204	34.5606	-1.26562	0.000230195	0.00107568
HMJ22_RS10075	CDS		47.0184	32.3675	37.3874	35.709	43.6009	86.5327	99.7048	103.41	76.9144	39.2167	91.6404	-1.16925	4.08086e-08	4.45935e-07
HMJ22_RS10275	CDS		3.73162	0	5.53887	6.18041	5.00338	19.5396	4.74785	14.9766	25.6381	4.09086	16.2255	-1.75537	0.00175369	0.00621479
HMJ22_RS10345	CDS	sufB	166.43	80.9188	90.0067	149.703	154.39	291.001	329.975	288.834	295.124	128.29	301.233	-1.15646	2.81222e-08	3.19232e-07
HMJ22_RS10505	CDS		145.533	121.378	110.777	128.415	140.81	501.052	465.289	400.088	427.872	129.383	448.575	-1.77055	6.18423e-31	7.687e-29
HMJ22_RS10575	CDS	gstA	1013.51	793.005	818.368	983.372	918.478	2315.45	2664.33	1866.36	2003.76	905.346	2212.48	-1.27861	3.5104e-17	1.43063e-15
HMJ22_RS10585	CDS		119.412	40.4594	88.622	115.368	113.648	214.936	231.062	206.819	185.734	95.5018	209.638	-1.0108	3.88642e-07	3.57177e-06
HMJ22_RS10605	CDS		470.93	509.789	398.799	331.682	285.908	880.679	1084.88	790.905	787.946	399.422	886.103	-1.17676	2.51747e-09	3.35573e-08
HMJ22_RS10705	CDS	add	136.577	80.9188	110.777	129.789	129.373	223.31	315.732	208.959	257.521	117.487	251.38	-1.03082	5.84212e-08	6.20663e-07
HMJ22_RS10715	CDS		129.114	89.0107	83.0831	134.596	123.655	327.289	349.758	308.802	324.18	111.892	327.507	-1.49036	2.32716e-17	9.80563e-16
HMJ22_RS10720	CDS	malX	40.3015	24.2756	33.2332	43.9496	52.8929	284.72	280.123	201.827	222.767	38.9306	247.359	-2.55536	7.75464e-31	9.25782e-29
HMJ22_RS10765	CDS	fumC	219.419	210.389	156.473	157.257	153.675	458.484	451.837	485.668	532.704	179.443	482.173	-1.45715	1.01722e-18	5.0576e-17
HMJ22_RS10810	CDS	bioD	96.2758	72.8269	106.623	142.836	125.799	263.785	401.193	146.2	158.387	108.872	242.391	-1.11135	0.000334775	0.00147431
HMJ22_RS10965	CDS		13.4338	24.2756	9.69303	15.7944	20.0135	79.5542	68.8438	81.3013	70.0776	16.6421	74.9442	-2.26643	8.58418e-18	3.71135e-16
HMJ22_RS10970	CDS		5.97059	16.1838	11.0777	13.7342	10.7215	49.5469	48.2698	43.5033	58.1131	11.5376	49.8583	-2.23872	1.58911e-12	3.40563e-11
HMJ22_RS10975	CDS		8.20956	0	4.15415	6.86712	3.57385	72.5758	84.6699	65.6116	71.2171	4.56094	73.5186	-3.69339	3.31981e-25	2.5394e-23
HMJ22_RS10980	CDS		5.22427	0	1.38472	6.18041	2.85908	46.7556	68.0525	60.6194	49.5671	3.12969	56.2486	-3.78515	1.71412e-19	9.1641e-18
HMJ22_RS10985	CDS		6.71692	32.3675	8.30831	8.92726	7.14769	124.914	136.896	105.549	108.82	12.6935	119.045	-3.7772	3.89711e-29	4.21226e-27
HMJ22_RS10990	CDS		15.6728	16.1838	9.69303	17.1678	10.0068	263.785	265.088	195.408	223.337	13.7448	236.905	-4.12364	1.37419e-56	7.59166e-54
HMJ22_RS11000	CDS		11.9412	0	16.6166	15.7944	11.4363	22.331	39.5654	24.9609	35.8934	11.1577	30.6877	-1.22884	0.000475593	0.00199717
HMJ22_RS11005	CDS		37.3162	64.7351	30.4638	40.516	26.4465	355.203	521.472	297.392	307.658	39.8955	370.431	-3.36627	6.40892e-38	1.27461e-35
HMJ22_RS11010	CDS		61.1986	129.47	34.618	84.4656	73.6212	173.065	203.366	169.734	196.559	76.6747	185.681	-1.39741	6.68093e-08	6.96385e-07
HMJ22_RS11060	CDS		357.489	331.767	200.784	412.714	366.677	599.448	908.421	562.691	651.779	333.886	680.585	-1.02214	8.05838e-06	5.61152e-05
HMJ22_RS11095	CDS		312.71	129.47	254.788	304.9	258.746	721.571	977.265	556.272	614.746	252.123	717.464	-1.45892	3.69386e-10	5.66848e-09
HMJ22_RS11160	CDS		53.7353	24.2756	34.618	58.3705	50.0338	97.0003	104.453	94.1384	101.983	44.2067	99.3935	-1.03582	1.85113e-06	1.5113e-05
HMJ22_RS11170	CDS		167.177	153.746	112.162	101.633	116.507	316.123	642.542	285.268	289.996	130.245	383.482	-1.57833	2.20524e-08	2.53807e-07
HMJ22_RS11210	CDS		37.3162	16.1838	48.4651	26.7818	25.7317	66.993	105.244	72.0301	51.2763	30.8957	73.8858	-1.17432	9.03775e-05	0.000477531
HMJ22_RS11295	CDS		71.6471	24.2756	58.1582	108.501	89.3461	144.454	166.966	149.052	166.933	70.3855	156.851	-1.02093	3.30246e-05	0.000198068
HMJ22_RS11300	CDS		5.97059	0	8.30831	6.18041	7.14769	10.4677	15.8262	19.2556	18.8013	5.5214	16.0877	-1.31053	0.00247192	0.00833002
HMJ22_RS11305	CDS		47.0184	8.09188	45.6957	43.2629	31.4498	85.137	70.4264	90.5725	91.1578	35.1037	84.3234	-1.09377	6.06362e-06	4.363e-05
HMJ22_RS11370	CDS		58.2133	64.7351	58.1582	55.6237	57.1815	129.799	125.818	102.696	109.389	58.7823	116.926	-1.01926	1.66871e-08	1.96143e-07
HMJ22_RS11375	CDS		83.5883	89.0107	70.6206	49.4433	51.4634	203.073	231.853	181.145	226.755	68.8253	210.707	-1.69069	5.13565e-15	1.55698e-13
HMJ22_RS11385	CDS		40.3015	32.3675	65.0817	86.5258	93.6348	120.029	130.566	157.61	143.004	63.5823	137.802	-1.0217	0.00016093	0.000793792
HMJ22_RS11470	CDS		18.6581	8.09188	18.0013	35.709	14.2954	39.7771	51.435	54.2009	43.3	18.9511	47.1782	-1.16026	0.00043155	0.00183077
HMJ22_RS11495	CDS	eno	51.4964	64.7351	33.2332	46.6964	42.1714	99.7917	124.235	64.8984	76.9144	47.6665	91.46	-1.00825	9.90468e-05	0.000517291
HMJ22_RS11570	CDS		52.989	80.9188	26.3096	50.13	48.6043	129.101	91.0004	88.433	82.6118	51.7904	97.7866	-1.02669	7.39123e-05	0.000400318
HMJ22_RS11580	CDS		37.3162	24.2756	62.3123	37.7692	53.6077	180.742	109.2	201.827	150.98	43.0562	160.687	-1.82396	3.49444e-12	7.00578e-11
HMJ22_RS11585	CDS		170.908	234.665	121.855	217.688	185.84	422.196	536.507	489.947	477.439	186.191	481.522	-1.40514	8.35632e-14	2.18672e-12
HMJ22_RS11655	CDS		570.191	501.697	337.871	412.027	448.875	842.298	884.682	1065.48	1095.6	454.132	972.015	-1.10564	7.64798e-10	1.11513e-08
HMJ22_RS11660	CDS		271.662	234.665	202.169	234.169	254.458	740.413	828.499	613.326	675.138	239.424	714.344	-1.56804	2.41957e-24	1.77482e-22
HMJ22_RS11665	CDS		691.842	477.421	617.584	738.902	838.424	1736.93	1766.2	1693.78	1591.27	672.835	1697.05	-1.30707	3.81518e-17	1.5422e-15
HMJ22_RS11670	CDS		20.1507	32.3675	27.6944	30.2153	36.4532	83.7413	63.3046	57.0536	41.5908	29.3762	61.4226	-1.08204	0.00018852	0.000910907
HMJ22_RS11725	CDS		123.143	80.9188	101.084	107.127	155.105	321.008	364.793	220.369	299.681	113.476	301.463	-1.353	3.90864e-10	5.96127e-09
HMJ22_RS11735	CDS		11.1949	0	23.5402	26.7818	20.7283	36.9857	45.1046	55.6272	50.1368	16.449	46.9636	-1.28784	9.91641e-05	0.00051736
HMJ22_RS11745	CDS		14.1802	16.1838	16.6166	10.3007	7.86246	41.1728	18.9914	40.6507	26.7776	13.0287	31.8981	-1.39599	0.000200579	0.000959846
HMJ22_RS11825	CDS		90.3052	97.1026	84.4678	133.222	126.514	285.418	470.037	273.144	271.195	106.322	324.948	-1.58846	3.07927e-11	5.50254e-10
HMJ22_RS11885	CDS		152.996	121.378	117.701	163.438	125.799	397.771	321.271	528.459	548.087	136.263	448.897	-1.69754	7.3318e-16	2.51405e-14
HMJ22_RS11890	CDS		118.666	194.205	142.626	50.13	128.658	116.54	273.001	367.282	337.854	126.857	273.669	-1.16117	0.00157453	0.00564019
HMJ22_RS11910	CDS		583.625	752.545	699.283	403.1	388.834	1183.54	1256.6	1358.59	1401.55	565.478	1300.07	-1.22489	9.61882e-09	1.17807e-07
HMJ22_RS11915	CDS		30.5993	0	16.6166	28.8419	18.584	53.0362	83.0873	82.0145	76.3447	18.9284	73.6207	-1.70388	5.92282e-08	6.26559e-07
HMJ22_RS11935	CDS	fusA	253.75	275.124	164.781	267.818	253.028	642.017	675.777	597.636	593.096	242.9	627.131	-1.38124	1.03784e-16	4.0001e-15
HMJ22_RS12105	CDS	olsF	626.912	614.983	346.18	563.791	596.117	2236.59	2483.92	2459.72	2554.7	549.597	2433.73	-2.15319	1.52776e-32	2.23413e-30
HMJ22_RS12130	CDS	ugpC	1.49265	0	1.38472	4.80699	2.85908	12.5612	9.49569	12.837	8.54605	2.10869	10.86	-2.00634	0.000722892	0.00287548
HMJ22_RS12135	CDS		4.47794	0	6.92359	11.6741	5.00338	16.0504	21.3653	17.1161	33.0447	5.61581	21.8941	-1.70839	0.000249905	0.00115584
HMJ22_RS12150	CDS		13.4338	0	1.38472	14.421	7.86246	23.7267	22.9479	25.6741	38.7421	7.42039	27.7727	-1.59596	0.000611391	0.00247978
HMJ22_RS12155	CDS		8.95589	0	0	7.55384	2.85908	21.6332	10.287	19.9687	16.5224	3.87376	17.1028	-1.79614	0.00162344	0.00579449
HMJ22_RS12160	CDS		38.0625	64.7351	19.3861	10.9874	18.584	92.1154	127.401	57.7667	68.3684	30.351	86.4128	-1.75202	1.86989e-05	0.000119194
HMJ22_RS12310	CDS	nifJ	226.136	194.205	231.248	249.277	259.461	489.189	564.994	442.878	485.985	232.065	495.762	-1.06131	3.57831e-14	9.77547e-13
HMJ22_RS12390	CDS	pspC	85.0809	8.09188	91.3914	139.403	112.219	270.066	360.045	300.957	304.809	87.2371	308.969	-1.68918	1.95896e-09	2.65394e-08
HMJ22_RS12395	CDS	pspB	50.0037	153.746	36.0027	54.937	70.0474	141.662	136.896	168.308	180.606	72.9473	156.868	-1.30458	1.43359e-05	9.42834e-05
HMJ22_RS12400	CDS	pspA	635.122	671.626	605.122	531.515	548.943	1383.83	1406.15	1166.03	1311.53	598.466	1316.89	-1.15502	5.33398e-20	2.91435e-18
HMJ22_RS12455	CDS		108.963	178.021	87.2372	64.551	63.6145	265.879	198.618	207.532	214.791	100.477	221.705	-1.2802	1.004e-06	8.63646e-06
HMJ22_RS12500	CDS		113.441	80.9188	152.319	196.4	145.098	451.505	371.123	427.188	483.137	137.635	433.238	-1.58668	2.186e-14	6.14057e-13
HMJ22_RS12585	CDS		8.20956	0	0	4.12027	3.57385	9.07198	25.3219	10.6975	13.6737	3.18074	14.6913	-1.85231	0.00256654	0.00858737
HMJ22_RS12590	CDS		32.0919	8.09188	23.5402	53.5636	38.5975	129.101	91.0004	47.7824	75.2052	31.177	85.7723	-1.30292	0.000284287	0.00129558
HMJ22_RS12600	CDS	osmB	630.644	590.707	740.824	785.599	862.012	2175.18	2094.59	1631.73	1641.98	721.957	1885.87	-1.37068	7.86218e-17	3.10244e-15
HMJ22_RS12605	CDS	yciH	23.8824	16.1838	13.8472	16.4811	23.5874	35.5901	60.9307	34.9453	33.6145	18.7964	41.2701	-1.06876	0.000765971	0.00302341
HMJ22_RS12610	CDS	pyrF	79.8567	97.1026	81.6984	86.5258	89.3461	185.627	147.975	176.866	180.606	86.9059	172.768	-1.02008	3.05873e-10	4.7525e-09
HMJ22_RS12800	CDS		21.6434	48.5513	12.4625	11.6741	7.14769	64.8995	47.4785	54.2009	45.5789	20.2958	53.0394	-1.77423	6.58532e-06	4.69759e-05
HMJ22_RS12805	CDS		28.3603	24.2756	38.7721	28.1552	33.5942	197.49	212.862	149.766	116.226	30.6315	169.086	-2.42724	1.76398e-21	1.06958e-19
HMJ22_RS12810	CDS	xylB	19.4044	0	4.15415	18.5412	12.8658	32.1008	41.9393	32.0926	41.5908	10.9931	36.9309	-1.45138	0.000192059	0.000927105
HMJ22_RS12815	CDS		8.20956	8.09188	4.15415	2.74685	11.4363	21.6332	26.9045	22.8214	17.0921	6.92775	22.1128	-1.68024	0.000120618	0.000615092
HMJ22_RS12860	CDS	oppF	331.368	331.767	213.247	322.068	283.763	706.218	750.16	815.866	767.435	296.443	759.92	-1.36991	4.93305e-18	2.22974e-16
HMJ22_RS12865	CDS		170.908	202.297	92.7761	192.279	177.263	454.297	497.733	586.225	540.68	167.105	519.734	-1.65912	4.32023e-15	1.3178e-13
HMJ22_RS12870	CDS	oppC	70.9008	105.194	60.9276	152.45	110.074	333.57	288.827	440.026	462.626	99.9095	381.262	-1.93017	2.66358e-12	5.49516e-11
HMJ22_RS12875	CDS	oppB	153.743	56.6432	108.008	153.137	160.108	452.901	476.367	529.885	561.76	126.328	505.228	-1.89743	1.46951e-20	8.30272e-19
HMJ22_RS12880	CDS	oppA	2276.29	2565.13	1442.88	1466.13	1751.9	4289.65	4922.73	4305.4	4321.45	1900.46	4459.81	-1.23933	1.25355e-10	2.04349e-09
HMJ22_RS12930	CDS	rssA	105.978	113.286	90.0067	156.57	120.796	242.152	289.619	206.106	240.999	117.327	244.719	-1.04282	1.87555e-07	1.83207e-06
HMJ22_RS13055	CDS	yeaG	5707.89	6505.87	4570.95	4991.71	5632.38	12431.4	11561	10834.5	10917.9	5481.76	11436.2	-1.06427	9.33571e-16	3.11525e-14
HMJ22_RS13060	CDS		1373.24	1505.09	1078.7	1509.39	1452.41	2902.33	2922.3	2743.56	2619.65	1383.77	2796.96	-1.01936	2.3233e-14	6.45333e-13
HMJ22_RS13070	CDS		893.35	671.626	761.595	1016.33	947.784	1838.12	3268.89	1877.78	1876.14	858.138	2215.23	-1.35775	2.32529e-10	3.64711e-09
HMJ22_RS13105	CDS		1334.43	1092.4	732.516	1525.87	1379.5	2323.12	3565.63	1894.18	1954.2	1212.95	2434.28	-1.00147	6.96293e-05	0.000380436
HMJ22_RS13190	CDS		323.158	250.848	306.023	488.252	375.969	1003.5	935.326	892.175	789.655	348.85	905.164	-1.34207	1.10668e-12	2.43469e-11
HMJ22_RS13390	CDS	grxB	149.265	105.194	139.857	150.39	121.511	302.864	255.592	270.291	283.159	133.243	277.977	-1.01447	2.29665e-11	4.16749e-10
HMJ22_RS13475	CDS		275.394	356.043	186.937	315.888	291.626	710.405	744.621	765.944	829.536	285.177	762.627	-1.44774	1.98858e-16	7.27002e-15
HMJ22_RS13480	CDS		461.975	428.87	303.253	598.813	495.335	910.687	875.187	1030.53	1018.69	457.649	958.773	-1.05752	3.71962e-08	4.13735e-07
HMJ22_RS13580	CDS		117.173	113.286	113.547	120.861	102.927	224.706	538.089	188.99	199.978	113.559	287.941	-1.34048	1.29693e-05	8.5749e-05
HMJ22_RS13645	CDS		133.592	113.286	84.4678	124.295	122.94	323.102	396.445	246.043	303.67	115.716	317.315	-1.43971	7.95038e-13	1.77261e-11
HMJ22_RS13680	CDS		188.82	137.562	170.32	240.349	235.159	923.946	970.935	749.541	810.735	194.442	863.789	-2.0974	2.7066e-32	3.73812e-30
HMJ22_RS13685	CDS	cydB	126.129	129.47	84.4678	124.982	145.098	444.527	534.133	453.576	450.092	122.029	470.582	-1.94509	1.03122e-28	1.04637e-26
HMJ22_RS13690	CDS		29.1066	8.09188	22.1555	54.937	52.8929	171.67	263.506	134.076	138.446	33.4368	176.924	-2.24012	9.80509e-11	1.61427e-09
HMJ22_RS13915	CDS	phoH	1491.9	1553.64	857.14	758.13	826.988	2915.59	2872.45	1742.27	1844.81	1097.56	2343.78	-1.10387	4.2679e-05	0.000247608
HMJ22_RS13925	CDS		108.217	169.93	58.1582	59.0573	63.6145	167.483	163.801	227.501	211.372	91.7953	192.539	-1.20793	2.52015e-05	0.000156042
HMJ22_RS13935	CDS	putP	553.026	517.88	387.721	347.476	350.952	1712.51	1743.25	1796.47	1848.79	431.411	1775.26	-2.06216	1.68281e-32	2.39055e-30
HMJ22_RS14055	CDS		17.9118	16.1838	11.0777	17.8545	15.0102	29.3095	41.148	37.0848	51.2763	15.6076	39.7046	-1.33138	1.28114e-05	8.48179e-05
HMJ22_RS14275	CDS	uspC	75.3787	16.1838	37.3874	19.9147	44.3157	198.188	201.784	136.215	132.749	38.636	167.234	-2.00586	9.61984e-09	1.17807e-07
HMJ22_RS14280	CDS		126.129	113.286	114.932	169.618	139.38	376.138	472.411	369.422	378.875	132.669	399.211	-1.55097	6.23312e-19	3.13041e-17
HMJ22_RS14460	CDS	sbmC	33.5846	40.4594	22.1555	26.0951	20.0135	77.4607	113.948	94.8515	88.8789	28.4616	93.7849	-1.82595	2.99006e-13	7.25198e-12
HMJ22_RS14465	CDS	kynA	138.816	145.654	90.0067	95.453	92.92	378.929	404.358	430.754	447.813	112.57	415.464	-1.94268	2.98636e-26	2.4747e-24
HMJ22_RS14470	CDS		50.0037	64.7351	45.6957	58.3705	49.3191	91.4176	85.4613	133.363	112.238	53.6248	105.62	-1.02365	2.1924e-06	1.76958e-05
HMJ22_RS14520	CDS	arsC	13.4338	16.1838	13.8472	34.3356	19.2988	56.5254	53.0176	72.0301	70.6473	19.4198	63.0551	-1.62768	3.01696e-07	2.85177e-06
HMJ22_RS14535	CDS		29.853	48.5513	20.7708	54.2503	32.8794	135.382	128.192	122.665	112.808	37.2609	124.762	-1.78811	2.44469e-12	5.06459e-11
HMJ22_RS14550	CDS		40.3015	48.5513	31.8485	43.2629	37.168	82.3456	96.5396	118.386	131.039	40.2264	107.078	-1.45549	1.77683e-10	2.8498e-09
HMJ22_RS14570	CDS		223.897	113.286	177.244	266.444	239.448	569.441	773.108	738.13	839.222	204.064	729.975	-1.77582	1.47686e-17	6.27601e-16
HMJ22_RS14630	CDS		264.945	250.848	258.942	574.778	449.59	725.758	633.838	734.565	871.127	359.821	741.322	-1.02071	9.48579e-05	0.000498129
HMJ22_RS14650	CDS	yjdN	225.39	194.205	162.012	170.991	213.001	450.807	368.749	400.088	394.827	193.12	403.618	-1.05894	1.57851e-11	2.93946e-10
HMJ22_RS14710	CDS		5.97059	0	5.53887	12.3608	5.71815	18.8418	22.1566	24.9609	26.7776	5.91769	23.1842	-1.67552	5.73734e-05	0.000322328
HMJ22_RS14715	CDS	paaI	0.746324	0	0	0.686712	0.714769	6.97844	8.70439	2.13951	3.98816	0.429561	5.45262	-2.9807	0.00258295	0.00863065
HMJ22_RS14725	CDS	paaF	3.73162	8.09188	1.38472	4.80699	0.714769	13.259	15.0349	19.2556	21.65	3.746	17.2999	-2.53918	3.13739e-06	2.43736e-05
HMJ22_RS14765	CDS		5.22427	0	1.38472	7.55384	7.14769	16.0504	22.1566	17.1161	11.9645	4.2621	16.8219	-1.6208	0.000821256	0.00321772
HMJ22_RS14780	CDS	gabD	816.478	882.015	488.805	606.367	596.832	1481.52	1894.39	1373.56	1481.31	678.1	1557.7	-1.21753	4.19514e-10	6.35922e-09
HMJ22_RS14920	CDS		273.155	356.043	510.961	209.447	455.308	582.002	530.176	1191.71	1085.92	360.983	847.451	-1.23301	8.63547e-05	0.000459204
HMJ22_RS15030	CDS		17.1655	0	18.0013	19.2279	23.5874	40.475	54.6002	34.9453	43.8697	15.5964	43.4726	-1.22185	5.95379e-05	0.00033261
HMJ22_RS15035	CDS		178.371	113.286	173.09	209.447	187.27	418.707	403.567	441.452	464.905	172.293	432.158	-1.25561	1.47375e-16	5.55114e-15
HMJ22_RS15055	CDS	gap	147.026	129.47	106.623	140.089	144.383	279.836	385.367	264.586	297.972	133.518	306.94	-1.18504	4.95103e-11	8.51783e-10
HMJ22_RS15065	CDS		17.1655	16.1838	23.5402	41.2027	35.0237	46.0577	64.8872	72.0301	68.3684	26.6232	62.8359	-1.13195	0.000220347	0.00103845
HMJ22_RS15095	CDS		124.636	89.0107	83.0831	175.798	123.655	408.937	464.498	524.893	529.855	119.237	482.046	-1.96117	5.40657e-19	2.74301e-17
HMJ22_RS15110	CDS	nac	499.291	412.686	351.718	398.98	343.804	1023.04	1384.79	1200.26	1239.18	401.296	1211.82	-1.59591	1.1593e-22	7.78925e-21
HMJ22_RS15270	CDS	agp	191.805	291.308	157.858	155.884	145.813	562.462	500.898	524.893	507.065	188.533	523.83	-1.57113	6.89104e-18	3.03206e-16
HMJ22_RS15315	CDS		50.75	48.5513	23.5402	53.5636	34.3089	127.008	170.923	113.394	140.725	42.1428	138.012	-1.71982	1.50899e-11	2.82057e-10
HMJ22_RS15345	CDS		26.1213	16.1838	16.6166	37.7692	35.0237	74.6693	74.3829	87.0067	84.8907	26.3429	80.2374	-1.47161	1.62675e-08	1.91664e-07
HMJ22_RS15390	CDS		866.482	946.75	715.899	804.14	820.555	1640.63	2066.1	1419.21	1518.35	830.765	1661.07	-1.00954	3.33424e-11	5.89958e-10
HMJ22_RS15425	CDS	katG	806.03	574.524	618.969	1003.29	1009.25	1632.96	2093.8	1462	1561.08	802.413	1687.46	-1.0567	2.87766e-07	2.73048e-06
HMJ22_RS15460	CDS		240.316	307.492	195.245	228.675	256.602	630.851	830.082	629.729	721.856	245.666	703.129	-1.55534	3.93429e-22	2.54043e-20
HMJ22_RS15465	CDS		67.9155	56.6432	59.5429	104.38	90.0609	139.569	163.801	179.006	208.524	75.7085	172.725	-1.12694	6.60836e-07	5.85682e-06
HMJ22_RS15490	CDS		301.515	153.746	210.477	197.773	238.018	551.297	747.786	413.638	372.038	220.306	521.19	-1.20942	9.38088e-07	8.12574e-06
HMJ22_RS15505	CDS		6.71692	8.09188	1.38472	8.24055	7.86246	232.382	390.115	249.609	260.37	6.4593	283.119	-5.41864	3.10165e-56	1.54214e-53
HMJ22_RS15510	CDS		5.22427	16.1838	1.38472	4.12027	3.57385	151.432	179.627	156.897	180.606	6.09737	167.141	-5.31941	1.67984e-46	5.56809e-44
HMJ22_RS15515	CDS	livM	12.6875	0	18.0013	15.7944	10.0068	180.742	209.697	187.564	205.675	11.298	195.919	-3.88465	4.98679e-54	2.06619e-51
HMJ22_RS15520	CDS		22.3897	16.1838	11.0777	12.3608	5.71815	198.886	190.705	192.556	210.803	13.546	198.237	-3.91799	4.07357e-41	1.01269e-38
HMJ22_RS15525	CDS		378.386	445.054	239.556	202.58	245.166	1734.14	1977.48	1447.73	1420.35	302.148	1644.93	-2.48756	2.06758e-26	1.74237e-24
HMJ22_RS15695	CDS		16.4191	0	4.15415	6.86712	3.57385	18.144	33.2349	27.8136	17.6618	6.20285	24.2136	-1.6841	0.000855872	0.00332966
HMJ22_RS15705	CDS		20.8971	0	11.0777	19.2279	20.0135	43.9642	45.8959	52.0614	42.7302	14.2433	46.1629	-1.40668	3.73017e-06	2.8621e-05
HMJ22_RS15725	CDS		543.324	501.697	646.663	576.152	576.104	1231	1266.09	1007	1088.77	568.788	1148.21	-1.00003	1.87726e-14	5.39521e-13
HMJ22_RS15755	CDS		545.563	485.513	397.414	387.992	387.405	1164.7	1167.18	1287.27	1296.15	440.777	1228.83	-1.49127	3.44801e-23	2.38104e-21
HMJ22_RS15880	CDS		60.4522	32.3675	31.8485	52.8768	54.3225	97.0003	114.74	111.254	109.959	46.3735	108.238	-1.12282	3.05108e-07	2.87855e-06
HMJ22_RS15885	CDS		264.199	347.951	286.637	167.558	237.303	613.405	788.143	665.387	576.573	260.729	660.877	-1.38712	9.05194e-12	1.74443e-10
HMJ22_RS15990	CDS	ttrC	8.20956	0	4.15415	8.24055	7.14769	27.9138	31.6523	20.6819	25.0684	5.55039	26.3291	-1.92401	9.99477e-07	8.62588e-06
HMJ22_RS16175	CDS	idnD	55.9743	24.2756	24.9249	42.5762	45.7452	83.0435	94.9569	91.9989	74.0657	38.6993	86.0163	-1.03547	3.69933e-05	0.00021767
HMJ22_RS16180	CDS	idnO	35.8235	72.8269	27.6944	39.1426	30.7351	94.9068	56.9742	81.3013	71.2171	41.2445	76.0998	-1.07271	5.00943e-05	0.000285958
HMJ22_RS16330	CDS		24.6287	24.2756	24.9249	18.5412	20.0135	43.9642	37.9828	69.1774	49.5671	22.4768	50.1729	-1.19585	2.4216e-05	0.000150315
HMJ22_RS16335	CDS		17.1655	80.9188	12.4625	17.8545	15.0102	57.2232	67.2612	62.7589	60.3921	28.6823	61.9088	-1.57193	8.81834e-05	0.000467927
HMJ22_RS16340	CDS		39.5552	16.1838	18.0013	24.0349	18.584	144.454	130.566	169.021	174.339	23.2718	154.595	-2.6328	1.01546e-22	6.91626e-21
HMJ22_RS16345	CDS		5.22427	0	6.92359	10.3007	10.7215	29.3095	37.1915	22.8214	26.2079	6.63402	28.8826	-1.83219	2.55746e-06	2.02479e-05
HMJ22_RS16350	CDS		105.232	186.113	65.0817	73.4782	76.4803	267.972	261.923	233.92	234.162	101.277	249.494	-1.45483	2.22934e-09	2.98767e-08
HMJ22_RS16380	CDS		119.412	48.5513	106.623	138.029	147.957	225.404	296.74	269.578	272.904	112.115	266.156	-1.13848	3.02973e-08	3.42359e-07
HMJ22_RS16385	CDS	hisP	322.412	364.135	292.176	245.843	227.297	942.09	980.43	962.779	982.226	290.372	966.881	-1.77939	7.82036e-31	9.25782e-29
HMJ22_RS16390	CDS		188.074	129.47	135.702	152.45	140.81	399.167	413.063	413.638	434.139	149.301	415.002	-1.44079	1.66286e-21	1.02071e-19
HMJ22_RS16455	CDS		84.3346	72.8269	72.0053	102.32	97.9234	209.353	262.714	151.905	180.037	85.8821	201.002	-1.18504	4.07157e-08	4.45899e-07
HMJ22_RS16570	CDS	fabB	809.761	946.75	819.753	705.94	711.91	1794.86	1937.91	1836.41	1765.04	798.823	1833.56	-1.22162	4.34827e-24	3.04501e-22
HMJ22_RS16620	CDS	fadJ	425.405	299.4	285.252	420.955	363.103	657.369	696.351	860.082	856.884	358.823	767.672	-1.07399	9.31206e-10	1.34202e-08
HMJ22_RS16840	CDS		58.2133	48.5513	31.8485	47.3832	32.8794	250.526	341.054	212.524	235.301	43.7751	259.851	-2.57888	3.94082e-26	3.2121e-24
HMJ22_RS16845	CDS	mgrA	40.3015	72.8269	36.0027	40.516	42.1714	111.655	109.992	119.099	94.5763	46.3637	108.831	-1.38111	2.44247e-11	4.41599e-10
HMJ22_RS16860	CDS		513.471	477.421	465.265	530.142	505.342	1374.06	1114.95	1199.55	1280.2	498.328	1242.19	-1.30936	4.07739e-28	3.97505e-26
HMJ22_RS16930	CDS	alsS	1707.59	1205.69	805.906	2286.75	1901.29	3405.48	3602.03	4169.19	4451.35	1581.44	3907.01	-1.29993	8.47499e-07	7.39257e-06
HMJ22_RS16945	CDS	eutC	21.6434	24.2756	18.0013	29.5286	22.1578	62.806	69.6351	78.4486	70.0776	23.1214	70.2418	-1.59053	3.25249e-11	5.77549e-10
HMJ22_RS16950	CDS		145.533	97.1026	110.777	118.801	145.813	341.246	411.48	307.376	307.658	123.605	341.94	-1.41681	1.31195e-15	4.29147e-14
HMJ22_RS17030	CDS	cysA	253.004	194.205	135.702	199.147	162.967	555.484	529.385	553.419	598.793	189.005	559.27	-1.56237	9.78285e-17	3.80003e-15
HMJ22_RS17180	CDS	dhaL	29.1066	0	23.5402	19.9147	20.0135	36.9857	37.9828	44.9297	55.8342	18.515	43.9331	-1.01653	0.000833068	0.00325374
HMJ22_RS17185	CDS		26.8677	8.09188	15.2319	39.8293	19.2988	56.5254	51.435	72.0301	47.8579	21.8639	56.9621	-1.20606	0.000220779	0.0010395
HMJ22_RS17190	CDS		11.9412	0	5.53887	26.0951	17.1545	31.403	37.9828	30.6663	39.3118	12.1459	34.841	-1.24095	0.00224117	0.00767959
HMJ22_RS17195	CDS		6.71692	32.3675	2.76944	14.421	17.1545	22.331	31.6523	34.9453	31.9052	14.6859	30.2085	-1.3296	0.00168185	0.00599868
HMJ22_RS17385	CDS	uraA	48.5111	56.6432	49.8498	52.1901	54.3225	98.396	106.035	121.239	117.366	52.3033	110.759	-1.10311	1.7118e-09	2.34465e-08
HMJ22_RS17395	CDS	purM	400.03	339.859	470.804	368.078	314.498	686.679	1089.63	749.541	793.643	378.654	829.873	-1.1241	2.12516e-09	2.86349e-08
HMJ22_RS17575	CDS		1275.47	1318.98	886.22	1019.08	1062.86	3270.1	2764.04	1969.06	1770.17	1112.52	2443.34	-1.14095	7.05411e-08	7.32213e-07
HMJ22_RS17590	CDS		2.9853	8.09188	2.76944	1.37342	4.28862	18.8418	9.49569	19.2556	14.8131	3.90173	15.6016	-2.36298	1.5286e-05	9.96097e-05
HMJ22_RS17595	CDS		2.9853	0	1.38472	0	0	7.67629	8.70439	5.70536	8.54605	0.874003	7.65802	-2.83103	0.000682692	0.00273958
HMJ22_RS17625	CDS		11.9412	24.2756	23.5402	8.24055	7.86246	41.8707	21.3653	37.798	30.7658	15.172	32.9499	-1.35261	0.000710701	0.00284052
HMJ22_RS17630	CDS		12.6875	24.2756	15.2319	6.18041	9.292	43.2663	65.6786	55.6272	40.4513	13.5335	51.2559	-2.20293	5.30429e-10	7.94366e-09
HMJ22_RS17635	CDS	srlB	2.9853	0	1.38472	1.37342	4.28862	11.8634	23.7392	17.8292	10.2553	2.00641	15.9218	-2.64124	8.9098e-06	6.11872e-05
HMJ22_RS17640	CDS	srlD	16.4191	0	11.0777	6.18041	8.57723	14.6547	37.9828	32.0926	39.8816	8.4509	31.1529	-1.65385	0.000178285	0.000868202
HMJ22_RS17745	CDS	guaB	1287.41	1165.23	690.974	806.2	857.008	3074.7	3217.46	2624.46	2729.04	961.365	2911.42	-1.60718	5.27583e-16	1.83436e-14
HMJ22_RS17765	CDS		197.03	178.021	196.63	203.954	200.85	546.412	400.402	467.839	557.202	195.297	492.964	-1.31919	5.40131e-18	2.4194e-16
HMJ22_RS17945	CDS		23.8824	24.2756	19.3861	19.9147	15.7249	36.9857	45.1046	89.1462	96.8552	20.6367	67.0229	-1.74633	9.15979e-07	7.97591e-06
HMJ22_RS17950	CDS		69.4081	56.6432	26.3096	58.3705	52.8929	101.885	106.035	159.037	198.838	52.7249	141.449	-1.42126	2.03622e-06	1.65156e-05
HMJ22_RS17955	CDS		420.927	323.675	210.477	193.653	177.263	435.455	552.333	629.015	650.069	265.199	566.718	-1.11253	3.4194e-05	0.000202637
HMJ22_RS18020	CDS		79.8567	72.8269	34.618	63.1775	68.6178	270.066	425.724	308.802	349.818	63.8194	338.602	-2.41646	3.70923e-24	2.63462e-22
HMJ22_RS18025	CDS	murQ	98.5148	137.562	74.7748	118.115	79.3394	448.714	579.237	475.684	489.973	101.661	498.402	-2.36105	3.57327e-35	5.92209e-33
HMJ22_RS18250	CDS		6.71692	8.09188	5.53887	13.0475	9.292	36.2879	51.435	30.6663	39.8816	8.53744	39.5677	-2.14453	1.81994e-09	2.4791e-08
HMJ22_RS18255	CDS		23.136	8.09188	19.3861	13.7342	20.7283	53.734	65.6786	44.2165	51.2763	17.0153	53.7263	-1.52224	6.37676e-08	6.66077e-07
HMJ22_RS18445	tmRNA	ssrA	128975	118959	123853	101489	98595.3	177689	439099	187986	202156	114374	251732	-1.13814	1.43648e-05	9.43482e-05
HMJ22_RS18500	CDS		47.7647	24.2756	52.6193	109.187	90.7757	168.878	84.6699	174.727	134.458	64.9245	140.683	-1.01707	0.00240103	0.00814644
HMJ22_RS18510	CDS		585.864	428.87	786.52	819.248	941.351	2469.67	2766.41	1697.34	1661.35	712.371	2148.69	-1.57636	8.02009e-11	1.33364e-09
HMJ22_RS18715	CDS		188.074	161.838	173.09	195.026	157.964	368.462	509.602	324.492	292.275	175.198	373.708	-1.07838	4.51631e-08	4.89217e-07
HMJ22_RS18760	CDS	metN	79.1103	56.6432	91.3914	78.2852	115.078	247.735	196.244	136.215	143.004	84.1016	180.8	-1.045	2.24736e-05	0.000140552
HMJ22_RS19225	CDS		8.20956	0	5.53887	6.18041	5.00338	25.1224	13.4522	35.6585	27.3474	4.98645	25.3951	-2.08156	3.49531e-06	2.6902e-05
HMJ22_RS19370	CDS	lldD	34.3309	8.09188	41.5415	69.3579	68.6178	142.36	141.644	111.968	112.238	44.388	127.053	-1.35028	5.12116e-06	3.74132e-05
HMJ22_RS19420	CDS		179.864	80.9188	188.322	465.591	316.643	870.212	592.69	847.958	879.103	246.268	797.491	-1.6564	1.77651e-06	1.45515e-05
HMJ22_RS19430	CDS		120.158	210.389	47.0804	58.3705	69.3326	322.404	200.201	206.106	228.464	101.066	239.294	-1.37098	9.72561e-05	0.000509544
HMJ22_RS19435	CDS		84.3346	56.6432	24.9249	42.5762	47.1748	145.849	183.583	165.455	178.897	51.1307	168.446	-1.72179	1.44335e-09	1.99897e-08
HMJ22_RS19465	CDS		23.8824	16.1838	12.4625	19.2279	17.8692	47.4534	46.6872	41.3638	38.1723	17.9252	43.4192	-1.21191	9.69483e-06	6.54928e-05
HMJ22_RS19620	CDS		78.364	64.7351	54.004	117.428	83.628	166.785	210.488	192.556	181.176	79.6318	187.751	-1.18219	1.60646e-07	1.58165e-06
HMJ22_RS19625	CDS	gcvP	681.394	574.524	409.877	615.294	561.094	2277.76	2238.61	2046.8	2205.45	568.436	2192.15	-1.94477	2.35686e-34	3.66197e-32
HMJ22_RS19630	CDS	gcvH	289.574	121.378	238.171	305.587	290.911	633.643	668.655	569.109	600.502	249.124	617.977	-1.24039	5.02746e-11	8.61949e-10
HMJ22_RS19635	CDS	gcvT	1019.48	841.556	512.346	586.452	533.218	1319.62	1876.19	1304.39	1445.99	698.61	1486.55	-1.09765	2.6544e-06	2.09155e-05
HMJ22_RS19665	ncRNA	ssrS	231.36	226.573	138.472	266.444	105.786	304.26	534.924	590.504	778.83	193.727	552.13	-1.52252	1.26316e-06	1.06629e-05
HMJ22_RS19760	CDS		32.8383	24.2756	33.2332	26.0951	22.8726	62.806	69.6351	68.4643	68.9381	27.863	67.4609	-1.25947	2.37189e-08	2.71729e-07
HMJ22_RS19765	CDS		8.20956	0	6.92359	4.12027	15.7249	25.8202	34.8175	35.6585	27.3474	6.99567	30.9109	-1.86909	8.28284e-06	5.74815e-05
HMJ22_RS19785	CDS		41.7941	0	13.8472	43.2629	24.3022	83.0435	95.7483	126.231	145.853	24.6413	112.719	-1.97231	8.16973e-08	8.37524e-07
HMJ22_RS19860	CDS		5.22427	0	1.38472	5.4937	4.28862	10.4677	15.8262	27.1004	14.8131	3.27826	17.0519	-2.0315	0.000127197	0.00064467
HMJ22_RS19870	CDS		29.853	64.7351	11.0777	26.0951	22.1578	43.2663	53.0176	72.0301	60.3921	30.7837	57.1765	-1.15001	0.000580332	0.0023807
HMJ22_RS19880	CDS		139.563	89.0107	137.087	111.247	100.068	225.404	261.132	334.476	296.263	115.395	279.319	-1.23705	1.24052e-10	2.02891e-09
HMJ22_RS19885	CDS		17.1655	8.09188	12.4625	20.6014	19.2988	29.3095	22.1566	76.3091	61.5315	15.524	47.3267	-1.48581	0.000321567	0.00142657
HMJ22_RS20000	CDS	panC	99.2611	64.7351	83.0831	89.9593	102.927	144.454	199.41	213.238	242.708	87.9931	199.952	-1.12547	3.98694e-08	4.38265e-07
HMJ22_RS20380	CDS	abgT	4.47794	8.09188	8.30831	20.6014	22.1578	56.5254	53.0176	80.5881	72.3565	12.7275	65.6219	-2.24244	2.10909e-08	2.43303e-07
HMJ22_RS20560	CDS	dhaM	58.2133	8.09188	41.5415	94.7663	90.0609	195.396	285.662	334.476	315.064	58.5348	282.65	-2.12654	4.77145e-11	8.29499e-10
HMJ22_RS20565	CDS	dhaL	136.577	89.0107	49.8498	93.3929	99.3529	187.72	255.592	236.772	226.185	93.6367	226.568	-1.25146	5.90657e-07	5.28192e-06
HMJ22_RS20570	CDS	dhaK	76.8714	105.194	38.7721	69.3579	66.4735	204.468	271.419	280.989	250.684	71.3339	251.89	-1.90918	5.90156e-18	2.61987e-16
HMJ22_RS20575	CDS		152.25	121.378	109.393	98.1999	95.7791	371.253	333.932	334.476	328.738	115.4	342.1	-1.57797	2.36834e-18	1.11088e-16
HMJ22_RS20610	CDS	hldE	334.353	258.94	278.328	421.641	352.381	680.398	767.569	750.254	712.171	329.129	727.598	-1.10976	3.06516e-12	6.22039e-11
HMJ22_RS20785	CDS		22.3897	40.4594	9.69303	11.6741	13.5806	37.6836	35.6089	60.6194	37.6026	19.5594	42.8786	-1.41393	8.91114e-05	0.000471845
HMJ22_RS20950	CDS	degQ	963.504	865.831	1167.32	1148.18	1067.15	2576.44	2444.35	2264.31	2243.05	1042.4	2382.04	-1.178	7.86798e-21	4.54879e-19
HMJ22_RS21060	CDS		23.136	24.2756	8.30831	25.4084	25.0169	36.9857	58.5568	65.6116	70.6473	21.2291	57.9504	-1.44076	7.01811e-06	4.95654e-05
HMJ22_RS21065	CDS		27.614	8.09188	40.1568	45.323	44.3157	103.281	113.948	122.665	140.155	33.1003	120.012	-1.68267	1.07719e-11	2.05203e-10
HMJ22_RS21070	CDS		33.5846	56.6432	20.7708	28.1552	18.584	97.6982	113.948	106.262	88.3092	31.5475	101.554	-1.89591	4.82453e-13	1.12092e-11
HMJ22_RS21075	CDS		26.1213	48.5513	11.0777	17.1678	22.8726	66.993	100.496	109.115	96.8552	25.1582	93.3648	-2.12385	1.56555e-12	3.36966e-11
HMJ22_RS21080	CDS		28.3603	32.3675	30.4638	30.2153	32.8794	73.2736	60.9307	82.0145	83.7513	30.8573	74.9925	-1.29798	5.37689e-09	6.80251e-08
HMJ22_RS21090	CDS		15.6728	24.2756	9.69303	11.6741	10.0068	41.1728	41.148	39.9375	34.7539	14.2645	39.2531	-1.65745	5.65043e-08	6.04171e-07
HMJ22_RS21385	CDS		122.397	64.7351	117.701	164.124	128.658	316.123	340.262	288.12	303.1	119.523	311.902	-1.28915	3.59049e-12	7.16945e-11
HMJ22_RS21440	CDS		20.8971	0	16.6166	35.0223	31.4498	58.6189	72.009	59.1931	55.2644	20.7972	61.2714	-1.30002	3.38125e-05	0.000201518
HMJ22_RS21490	CDS		15.6728	16.1838	27.6944	10.3007	20.7283	74.6693	87.8352	44.9297	39.3118	18.116	61.6865	-1.77573	9.27391e-07	8.06116e-06
HMJ22_RS21495	CDS		6.71692	0	19.3861	13.0475	12.1511	32.7987	33.2349	29.9531	29.0566	10.2603	31.2608	-1.40719	3.97159e-05	0.000231769
HMJ22_RS21650	CDS		2.23897	8.09188	1.38472	6.86712	6.43292	19.5396	15.0349	15.6897	17.6618	5.00312	16.9815	-1.86443	7.61426e-05	0.000409277
HMJ22_RS21655	CDS		14.1802	16.1838	9.69303	13.0475	9.292	52.3383	56.1829	39.2243	50.7065	12.4793	49.613	-2.05986	6.72115e-12	1.31049e-10
HMJ22_RS21660	CDS		138.07	153.746	83.0831	98.1999	115.793	371.951	338.68	277.423	268.346	117.778	314.1	-1.46603	4.9324e-13	1.14065e-11
HMJ22_RS21680	CDS	gntK	28.3603	32.3675	38.7721	48.7566	48.6043	108.166	102.87	72.7433	77.4842	39.3722	90.3158	-1.14715	4.67091e-06	3.47141e-05
HMJ22_RS21700	CDS	aceK	87.3199	72.8269	52.6193	88.5859	57.8963	227.497	228.688	266.725	267.776	71.8497	247.672	-1.77313	2.5739e-18	1.19602e-16
HMJ22_RS21705	CDS	aceA	268.677	283.216	227.094	236.916	191.558	767.629	927.413	806.595	868.278	241.492	842.479	-1.8337	4.96177e-34	7.47573e-32
HMJ22_RS21710	CDS	aceB	881.409	898.199	846.063	864.571	900.609	2263.11	2424.57	2098.86	2130.24	878.17	2229.19	-1.34621	1.49787e-40	3.54638e-38
HMJ22_RS22160	CDS		116.427	89.0107	78.9289	177.858	160.108	246.339	189.914	304.523	323.041	124.467	265.954	-1.04891	8.06155e-05	0.00043032
HMJ22_RS22280	CDS	pckA	732.144	760.637	329.563	352.283	398.126	2039.1	1900.72	1664.54	1772.45	514.551	1844.2	-1.86384	1.30356e-12	2.84268e-11
HMJ22_RS22290	CDS		78.364	48.5513	41.5415	58.3705	60.7554	173.065	163.801	145.487	158.956	57.5166	160.327	-1.42067	3.01009e-12	6.13963e-11
HMJ22_RS22390	CDS	glpD	570.938	525.972	470.804	602.247	536.077	2536.66	2481.54	1925.56	1973	541.208	2229.19	-2.03666	2.21041e-43	6.10564e-41
HMJ22_RS22395	CDS	glgP	650.048	647.351	419.57	625.595	671.883	1699.25	2042.37	1375.7	1418.64	602.889	1633.99	-1.44111	2.01405e-14	5.68968e-13
HMJ22_RS22400	CDS	glgA	346.294	242.756	202.169	365.331	340.945	891.147	1051.65	818.719	851.756	299.499	903.317	-1.56516	1.954e-15	6.18807e-14
HMJ22_RS22405	CDS	glgC	233.599	194.205	166.166	295.286	265.179	749.485	835.621	614.752	668.301	230.887	717.04	-1.6059	1.28464e-16	4.87574e-15
HMJ22_RS22430	CDS	gntK	125.382	40.4594	99.6997	128.415	137.95	309.843	302.28	234.633	248.975	106.381	273.933	-1.24851	6.82048e-09	8.49911e-08
HMJ22_RS22435	CDS	gntT	379.133	267.032	274.174	542.503	476.036	1910	2232.28	2034.67	2053.9	387.776	2057.71	-2.37802	9.14313e-29	9.47076e-27
HMJ22_RS22465	CDS		35.8235	16.1838	9.69303	14.421	12.8658	41.1728	65.6786	40.6507	43.8697	17.7974	47.8429	-1.37552	0.000305109	0.0013679
HMJ22_RS22470	CDS		32.0919	64.7351	29.0791	32.2755	36.4532	55.8275	91.7917	94.1384	76.9144	38.927	79.668	-1.19964	3.48334e-06	2.68514e-05
HMJ22_RS22475	CDS	iolD	49.2574	64.7351	38.7721	39.1426	30.7351	109.562	128.192	114.107	121.924	44.5284	118.446	-1.53534	7.6576e-13	1.71503e-11
HMJ22_RS22510	CDS		10.4485	16.1838	16.6166	12.3608	18.584	31.403	29.2784	36.3716	43.8697	14.8387	35.2307	-1.29463	3.55824e-05	0.000210114
HMJ22_RS22515	CDS		2.9853	8.09188	12.4625	8.92726	5.71815	17.4461	21.3653	25.6741	28.4868	7.63701	23.2431	-1.70014	5.58149e-05	0.000314639
HMJ22_RS22660	CDS	uspB	1312.78	946.75	1336.25	1758.67	1572.49	2832.55	5024.01	1963.36	2235.08	1385.39	3013.75	-1.1154	5.57318e-05	0.000314631
HMJ22_RS22685	CDS		450.033	582.616	170.32	162.064	170.115	1117.95	1160.06	974.189	952.03	307.03	1051.06	-1.81512	4.11548e-07	3.7753e-06
HMJ22_RS22690	CDS		32.0919	24.2756	19.3861	6.18041	15.0102	66.2952	68.0525	60.6194	44.4394	19.3888	59.8516	-1.69442	9.66462e-06	6.53776e-05
HMJ22_RS22700	CDS		5.97059	24.2756	8.30831	10.3007	16.4397	15.3526	32.4436	29.2399	31.9052	13.059	27.2353	-1.28907	0.00158844	0.00568183
HMJ22_RS22705	CDS		44.0331	24.2756	22.1555	43.2629	16.4397	60.7124	57.7655	69.8906	65.5197	30.0334	63.4721	-1.01858	0.00103647	0.00394589
HMJ22_RS22810	CDS		276.886	299.4	234.017	320.695	295.914	623.175	583.194	544.861	576.004	285.382	581.808	-1.03022	3.85923e-14	1.04283e-12
HMJ22_RS22855	CDS	ilvA	179.864	97.1026	108.008	190.906	161.538	309.145	333.141	295.965	345.83	147.484	321.02	-1.05536	1.45836e-07	1.4473e-06
HMJ22_RS22860	CDS	ilvD	780.655	752.545	372.489	648.256	592.544	1233.79	1397.45	1287.98	1387.31	629.298	1326.63	-1.08569	1.04931e-07	1.05825e-06
HMJ22_RS22870	CDS	ilvM	50.75	40.4594	34.618	28.1552	34.3089	60.7124	95.7483	85.5803	85.4605	37.6583	81.8754	-1.13608	6.41987e-06	4.606e-05
HMJ22_RS23085	CDS		432.122	485.513	281.098	464.218	423.143	2503.17	2055.03	1884.19	1820.31	417.219	2065.67	-2.32035	1.07816e-36	2.06178e-34
HMJ22_RS23090	CDS	glpK	611.986	558.34	332.332	515.721	426.002	3131.92	3355.15	2457.58	2624.78	488.876	2892.36	-2.57336	5.07793e-39	1.09772e-36
HMJ22_RS23450	CDS	tdh	258.228	202.297	210.477	324.128	263.75	473.836	481.907	574.815	602.211	251.776	533.192	-1.04881	1.78801e-09	2.44231e-08
HMJ22_RS23455	CDS	kbl	222.405	226.573	189.706	229.362	206.568	507.333	436.802	537.017	500.798	214.923	495.487	-1.21173	2.75744e-19	1.44316e-17
HMJ22_RS23785	CDS	rbsC	146.279	169.93	87.2372	101.633	100.782	189.116	352.923	228.214	202.826	121.172	243.27	-1.06249	2.58077e-05	0.000159597
HMJ22_RS23790	CDS	rbsA	106.724	105.194	51.2346	100.26	78.6246	457.786	491.402	430.041	440.976	88.4076	455.051	-2.38542	4.07655e-32	5.47801e-30
HMJ22_RS23795	CDS	rbsD	100.754	97.1026	76.1595	94.0796	82.1985	413.822	420.184	218.23	227.895	90.0588	320.033	-1.83748	4.09431e-13	9.72617e-12
HMJ22_RS23905	CDS	pstA	32.0919	40.4594	27.6944	66.6111	23.5874	94.9068	92.583	90.5725	112.808	38.0888	97.7175	-1.35778	7.89353e-06	5.51217e-05
HMJ22_RS23930	CDS		27.614	80.9188	31.8485	67.2978	43.6009	88.6262	110.783	164.742	168.642	50.256	133.198	-1.51724	2.57387e-06	2.03131e-05
HMJ22_RS24765	CDS		256.735	372.227	314.331	82.4055	172.974	351.713	393.28	686.069	554.354	239.735	496.354	-1.08428	0.0023842	0.00810269

## Sheet: up genes
ID	biotype	symbol	Larvae1	Larvae2	Larvae3	Larvae4	Larvae5	Control1	Control2	Control3	Control4	Larvae	Control	log2FoldChange	pvalue	padj
HMJ22_RS00015	CDS	recF	197.776	137.562	238.171	249.963	204.424	95.6047	79.1308	91.2857	116.226	205.579	95.5618	1.14989	1.83535e-09	2.49326e-08
HMJ22_RS00070	CDS		211.21	202.297	228.478	203.954	173.689	103.979	115.531	84.154	100.843	203.926	101.127	1.01008	1.01919e-09	1.46034e-08
HMJ22_RS00075	CDS		208.224	129.47	270.02	207.387	207.998	53.734	73.5916	77.0223	71.2171	204.62	68.8913	1.61991	5.63969e-16	1.94726e-14
HMJ22_RS00080	CDS		53.7353	113.286	91.3914	87.2125	83.628	46.0577	38.7741	39.2243	28.4868	85.8507	38.1357	1.10639	1.06401e-05	7.1587e-05
HMJ22_RS00345	CDS		120.158	226.573	174.474	53.5636	93.6348	59.3168	76.7569	27.8136	52.9855	133.681	54.2182	1.23759	0.00111655	0.00421523
HMJ22_RS00360	CDS		8.20956	32.3675	99.6997	8.24055	14.2954	7.67629	5.53916	6.41852	7.40657	32.5625	6.76014	2.23512	0.00095024	0.00365115
HMJ22_RS00555	CDS	rho	1272.48	1205.69	1549.5	1504.59	1808.37	831.83	644.916	627.589	632.408	1468.12	684.186	1.10941	1.3096e-11	2.47579e-10
HMJ22_RS00565	CDS	wzzE	426.897	517.88	364.181	291.166	354.526	166.087	189.914	143.347	158.956	390.93	164.576	1.21191	3.88365e-11	6.84734e-10
HMJ22_RS00610	CDS	wzyE	68.6618	89.0107	67.8512	92.0195	65.7588	29.3095	19.7827	34.2321	22.2197	76.6604	26.386	1.50951	1.037e-09	1.4816e-08
HMJ22_RS00630	tRNA		24.6287	56.6432	73.3901	1.37342	10.7215	0	0	3.56585	0.569736	33.3514	1.0339	4.98237	0.0002574	0.00118609
HMJ22_RS00635	tRNA		113.441	89.0107	310.177	58.3705	94.3495	17.4461	47.4785	72.0301	55.8342	133.07	48.1972	1.47555	0.00153834	0.00553046
HMJ22_RS00670	CDS		803.045	1205.69	1009.46	686.712	957.076	524.081	399.61	444.305	439.267	932.397	451.816	1.0273	1.11976e-08	1.3546e-07
HMJ22_RS00805	CDS		456.004	428.87	1719.82	493.059	428.862	142.36	174.879	151.905	143.004	705.323	153.037	2.2093	1.28494e-08	1.54317e-07
HMJ22_RS01010	CDS	tatD	41.7941	48.5513	63.697	40.516	42.8862	17.4461	17.4088	19.2556	14.8131	47.4889	17.2309	1.43809	1.04172e-07	1.05273e-06
HMJ22_RS01015	CDS	hemB	329.875	267.032	276.944	339.236	323.076	118.634	166.175	146.2	141.864	307.232	143.218	1.12669	6.41651e-13	1.45675e-11
HMJ22_RS01075	rRNA		516.456	10017.8	2045.23	8.24055	50.0338	6.2806	17.4088	10.6975	11.3947	2527.54	11.4454	7.78633	6.13692e-08	6.4509e-07
HMJ22_RS01125	ncRNA		305.246	267.032	862.679	492.373	426.717	224.008	118.696	284.555	207.954	470.81	208.803	1.18461	0.000397171	0.00170677
HMJ22_RS01180	CDS	rpoC	9040.22	8237.54	7293.31	11810.8	10946.7	2976.31	2493.41	4827.44	4661.58	9465.7	3739.69	1.34028	8.40514e-09	1.03956e-07
HMJ22_RS01230	CDS	thiC	98.5148	161.838	116.316	66.6111	83.628	45.3599	54.6002	38.5111	49.5671	105.382	47.0096	1.05787	2.75197e-05	0.000169342
HMJ22_RS01280	rRNA		5288.45	56327.6	14684.9	472.458	2155.74	545.016	716.925	513.482	561.19	15785.8	584.153	4.75586	1.17096e-05	7.80434e-05
HMJ22_RS01295	rRNA		1082.17	16321.3	2246.01	163.438	576.104	152.828	567.368	213.951	183.455	4077.81	279.4	3.86641	0.000802443	0.00315645
HMJ22_RS01355	CDS		230.614	339.859	278.328	124.982	146.528	81.6478	87.8352	104.836	120.214	224.062	98.6333	1.13123	6.91016e-05	0.000377968
HMJ22_RS01425	CDS	cutA	182.849	194.205	156.473	85.1523	123.655	76.065	72.009	39.2243	54.125	148.467	60.3558	1.25956	7.86942e-06	5.50306e-05
HMJ22_RS01430	CDS		240.316	250.848	221.555	324.128	325.22	94.9068	118.696	89.8593	122.493	272.414	106.489	1.36898	1.19896e-12	2.6261e-11
HMJ22_RS01485	CDS	sugE	48.5111	48.5513	83.0831	80.3453	65.7588	32.1008	18.2001	43.5033	37.6026	65.2499	32.8517	1.02339	0.000419131	0.00178877
HMJ22_RS01540	tRNA		979.177	1513.18	1794.59	953.843	1021.41	557.578	271.419	794.471	698.497	1252.44	580.491	1.10469	0.000239043	0.00111285
HMJ22_RS01715	CDS		1123.22	1788.31	1953.84	498.553	794.823	863.233	322.062	367.282	324.18	1231.75	469.189	1.38732	0.000457079	0.0019243
HMJ22_RS01800	CDS	rplU	5545.19	8334.64	5314.55	3003.68	4799.68	2716.01	2158.69	2511.07	2292.05	5399.55	2419.45	1.15482	2.33663e-06	1.87383e-05
HMJ22_RS01890	CDS	infB	5475.78	6457.32	4318.94	5111.2	5383.64	2296.61	2404.78	2600.93	2592.3	5349.38	2473.66	1.10904	4.86643e-16	1.70394e-14
HMJ22_RS01900	CDS	truB	178.371	137.562	142.626	241.036	213.716	66.2952	57.7655	84.154	71.2171	182.662	69.8579	1.42757	4.80426e-11	8.32292e-10
HMJ22_RS01925	CDS		1735.2	1367.53	2421.87	2790.11	2561.02	794.845	851.447	961.352	920.124	2175.15	881.942	1.30953	3.54524e-10	5.45726e-09
HMJ22_RS01960	CDS		67.1692	186.113	108.008	23.3482	67.9031	30.7051	41.9393	20.6819	30.196	90.5084	30.8806	1.44128	0.000917732	0.00353663
HMJ22_RS01965	CDS		115.68	105.194	144.011	207.387	156.534	51.6405	56.9742	51.3482	59.2526	145.761	54.8039	1.45777	6.5305e-11	1.09695e-09
HMJ22_RS01970	CDS		134.338	16.1838	128.779	125.668	109.36	36.2879	30.861	27.1004	35.3237	102.866	32.3933	1.78147	4.67993e-10	7.0511e-09
HMJ22_RS01985	CDS		29.1066	16.1838	26.3096	23.3482	16.4397	11.8634	8.70439	9.98437	8.54605	22.2776	9.77454	1.24863	0.000379875	0.00164668
HMJ22_RS02100	CDS	treC	620.942	469.329	512.346	861.137	776.239	122.821	117.114	150.479	141.864	647.999	133.069	2.30184	5.59821e-29	5.92219e-27
HMJ22_RS02220	tRNA		8.95589	0	15.2319	14.421	17.1545	1.39569	5.53916	2.13951	4.55789	11.1526	3.40806	1.92277	0.000591651	0.0024132
HMJ22_RS02245	CDS		1601.61	2087.71	1577.19	533.575	1342.34	163.993	254.801	283.128	267.776	1428.48	242.425	2.55228	7.60168e-16	2.57113e-14
HMJ22_RS02250	CDS		241.809	380.318	216.016	65.2377	185.125	62.1081	107.618	94.1384	95.7157	217.701	89.895	1.23005	0.000820927	0.00321772
HMJ22_RS02375	CDS		70.1544	202.297	95.5455	37.7692	31.4498	18.8418	25.3219	8.55803	17.6618	87.4432	17.5959	2.18861	4.35429e-06	3.26856e-05
HMJ22_RS02380	CDS		59.7059	24.2756	132.933	77.5985	53.6077	33.4965	40.3567	24.2478	34.1842	69.6241	33.0713	1.15226	0.000595684	0.00242567
HMJ22_RS02725	CDS	prfC	198.522	161.838	227.094	232.109	255.173	81.6478	82.296	87.7198	85.4605	214.947	84.281	1.39576	1.20583e-17	5.16845e-16
HMJ22_RS02840	CDS	trpR	382.864	339.859	414.031	317.948	318.072	206.562	158.262	159.037	158.387	354.555	170.562	1.05792	5.46576e-11	9.33875e-10
HMJ22_RS02875	CDS	thrL	20.8971	16.1838	58.1582	6.86712	12.8658	3.48922	1.58262	0.713169	0	22.9944	1.44625	4.04221	3.7108e-07	3.43577e-06
HMJ22_RS02890	CDS	thrC	2836.03	2751.24	2251.55	2457.06	2270.82	918.363	1051.65	1192.42	1247.15	2513.34	1102.4	1.1856	9.09705e-17	3.56146e-15
HMJ22_RS02945	CDS	rpsT	2456.9	4450.54	3211.16	700.447	1508.16	644.11	375.871	585.512	626.71	2465.44	558.051	2.1389	6.36326e-08	6.66066e-07
HMJ22_RS03140	CDS	sgrT	4.47794	16.1838	9.69303	9.61397	5.00338	3.48922	0	1.42634	0.569736	8.99442	1.37132	2.48827	0.00113753	0.00427177
HMJ22_RS03220	CDS	ftsL	179.118	347.951	90.0067	64.551	104.356	64.2017	87.0439	37.798	38.7421	157.197	56.9464	1.39117	0.00108815	0.00412367
HMJ22_RS03300	CDS	secA	1179.19	1108.59	1096.7	1190.07	1221.54	420.102	447.88	521.327	478.579	1159.22	466.972	1.31659	1.90209e-30	2.19934e-28
HMJ22_RS03305	CDS	mutT	37.3162	40.4594	49.8498	37.0825	43.6009	2.09353	8.70439	10.6975	8.54605	41.6618	7.51038	2.46793	4.06409e-12	8.0185e-11
HMJ22_RS03475	CDS	cysJ	723.188	882.015	170.32	266.444	260.176	129.799	157.47	156.897	151.55	460.429	148.929	1.60616	6.59166e-05	0.000363856
HMJ22_RS03495	CDS	cysG	180.61	178.021	44.311	109.187	112.219	39.0793	53.0176	48.4955	47.2881	124.87	46.9701	1.37246	3.84751e-05	0.000224792
HMJ22_RS03515	CDS		60.4522	56.6432	102.469	105.754	92.2052	38.3814	16.6175	43.5033	36.4631	83.5047	33.7413	1.34832	6.7264e-06	4.77767e-05
HMJ22_RS03595	CDS		160.46	226.573	178.629	179.232	215.146	97.6982	91.0004	100.557	74.0657	192.008	90.8303	1.05103	3.01484e-09	3.96555e-08
HMJ22_RS03685	CDS	yqaB	350.026	258.94	434.801	430.569	327.364	205.166	126.609	196.835	194.28	360.34	180.723	1.01992	4.3599e-07	3.97023e-06
HMJ22_RS03720	CDS	rpsP	1798.64	1755.94	1621.5	1410.51	1585.36	811.593	726.421	783.773	793.643	1634.39	778.857	1.06348	1.12779e-19	6.09499e-18
HMJ22_RS03755	CDS		50.75	56.6432	54.004	59.0573	49.3191	22.331	20.574	16.4029	16.5224	53.9547	18.9576	1.50259	9.57096e-10	1.37534e-08
HMJ22_RS03805	rRNA		5790.73	77455.5	15971.3	473.832	2064.25	791.355	1151.35	365.143	489.404	20351.1	699.314	4.86285	5.85894e-05	0.000328048
HMJ22_RS03865	CDS	rnhA	103.739	234.665	203.554	119.488	147.957	88.6262	59.3481	62.7589	46.7184	161.88	64.3629	1.2718	4.26027e-06	3.2094e-05
HMJ22_RS04060	CDS		63.4375	64.7351	77.5442	63.8642	56.4668	25.1224	15.0349	21.3951	25.6381	65.2096	21.7976	1.55866	1.93376e-10	3.06199e-09
HMJ22_RS04085	CDS	crl	700.052	728.269	887.604	628.342	676.886	331.476	243.723	233.206	287.147	724.231	273.888	1.39927	3.14172e-17	1.29096e-15
HMJ22_RS04100	tRNA		35.0772	48.5513	66.4665	30.2153	47.8895	14.6547	21.3653	12.837	17.0921	45.64	16.4873	1.43393	6.60452e-06	4.70454e-05
HMJ22_RS04185	CDS		53.7353	64.7351	73.3901	59.0573	66.4735	28.6116	23.7392	27.8136	28.4868	63.4782	27.1628	1.20414	7.077e-08	7.32815e-07
HMJ22_RS04225	CDS		102.246	145.654	141.241	111.247	107.93	57.2232	37.1915	47.0692	50.1368	121.664	47.9052	1.29067	3.80246e-10	5.81718e-09
HMJ22_RS04520	CDS	proY	110.456	105.194	120.47	152.45	180.122	44.662	33.2349	36.3716	34.1842	133.739	37.1132	1.89076	1.56961e-16	5.86773e-15
HMJ22_RS04770	CDS		61.9449	97.1026	99.6997	59.744	62.8997	30.7051	41.148	37.798	26.7776	76.2782	34.1072	1.09391	1.95499e-05	0.000123824
HMJ22_RS04785	CDS	glnK	4733.93	6724.35	3871.67	3029.77	3146.41	1930.94	1846.91	1478.4	1549.11	4301.23	1701.34	1.33359	1.71417e-08	2.00537e-07
HMJ22_RS04815	CDS	hha	250.019	299.4	393.26	63.1775	160.823	48.1513	29.2784	82.7277	73.496	233.336	58.4133	1.9804	4.42558e-06	3.30887e-05
HMJ22_RS04820	CDS	tomB	812	2217.18	1113.31	158.631	451.734	224.008	291.201	242.478	242.138	950.571	249.956	1.9204	0.00293269	0.00959298
HMJ22_RS04905	CDS		95.5295	56.6432	74.7748	89.9593	85.0575	48.8491	26.1132	34.9453	29.6263	80.3929	34.8835	1.2686	1.69754e-07	1.66802e-06
HMJ22_RS04980	CDS	copA	2350.17	2014.88	2788.82	2782.56	2593.9	762.046	874.395	1459.86	1537.72	2506.07	1158.5	1.11557	9.81312e-07	8.48536e-06
HMJ22_RS04990	CDS		67.9155	72.8269	41.5415	69.3579	72.1917	23.7267	29.2784	28.5268	31.9052	64.7667	28.3593	1.17988	1.09093e-06	9.272e-06
HMJ22_RS05005	CDS		166.43	137.562	105.239	160.004	146.528	43.2663	62.5133	59.1931	72.3565	143.152	59.3323	1.28292	3.15556e-09	4.11797e-08
HMJ22_RS05025	CDS		258.228	299.4	159.243	247.216	278.76	78.1586	102.079	93.4252	104.832	248.569	94.6235	1.37183	1.80171e-11	3.30558e-10
HMJ22_RS05110	CDS		34.3309	32.3675	31.8485	30.2153	49.3191	15.3526	15.8262	17.8292	17.0921	35.6163	16.525	1.13755	7.94841e-05	0.000425398
HMJ22_RS05140	tRNA		9.70221	16.1838	6.92359	2.74685	5.00338	0.697844	0.791308	2.13951	0.569736	8.11196	1.0496	2.69015	0.00112877	0.00424846
HMJ22_RS05250	CDS	crcB	38.0625	8.09188	40.1568	35.0223	35.7385	9.07198	21.3653	9.2712	9.68552	31.4144	12.3485	1.51229	2.59844e-05	0.00016049
HMJ22_RS05295	CDS	mrdB	85.8273	16.1838	63.697	102.32	89.3461	36.2879	34.8175	37.798	35.3237	71.4749	36.0568	1.13334	3.01233e-05	0.000183096
HMJ22_RS05315	CDS	nadD	61.9449	48.5513	74.7748	62.4908	55.752	23.0289	36.4002	26.3873	25.6381	60.7028	27.8636	1.16619	7.53272e-07	6.62879e-06
HMJ22_RS05370	CDS	lnt	146.279	80.9188	144.011	206.014	172.259	60.0146	72.8003	67.0379	72.9263	149.896	68.1948	1.21366	1.58655e-08	1.87372e-07
HMJ22_RS05390	CDS		73.8861	56.6432	62.3123	109.874	70.0474	33.4965	46.6872	42.7902	32.475	74.5526	38.8622	1.00272	7.69665e-05	0.000413258
HMJ22_RS05440	CDS		682.14	534.064	492.96	622.161	632.571	269.368	297.532	246.757	267.206	592.779	270.216	1.14813	2.25837e-15	7.01789e-14
HMJ22_RS05490	CDS	fur	2023.28	2783.61	2129.7	1153.68	1742.61	877.19	696.351	784.486	825.548	1966.57	795.894	1.29656	6.7001e-09	8.37007e-08
HMJ22_RS05500	CDS	ybfE	220.166	145.654	246.48	273.998	277.33	73.2736	64.0959	88.433	80.3328	232.726	76.5339	1.65703	7.72017e-18	3.36708e-16
HMJ22_RS05720	CDS	cpoB	424.658	453.145	461.111	475.892	521.782	170.972	146.392	210.385	213.081	467.318	185.208	1.33665	4.90052e-17	1.96495e-15
HMJ22_RS05725	tRNA		1153.82	1270.43	2251.55	720.361	1318.75	505.937	781.812	588.365	588.538	1342.98	616.163	1.12404	5.66202e-05	0.000318817
HMJ22_RS05945	CDS	bioC	27.614	24.2756	24.9249	19.9147	20.0135	5.58275	5.53916	8.55803	3.98816	23.3486	5.91702	1.97822	3.57466e-07	3.31589e-06
HMJ22_RS06030	CDS	rhlE	664.975	671.626	830.831	1100.8	1034.27	216.332	203.366	215.377	235.301	860.501	217.594	1.99587	1.94094e-26	1.66385e-24
HMJ22_RS06420	CDS		37.3162	8.09188	6.92359	15.1077	9.292	2.79138	0	4.99219	3.98816	15.3463	2.94293	2.4539	0.00031758	0.00141235
HMJ22_RS06450	CDS	trpS	300.022	226.573	420.954	569.971	529.644	110.957	99.7048	87.7198	90.5881	409.433	97.2425	2.10391	5.37178e-17	2.13668e-15
HMJ22_RS06455	CDS	phnC	23.8824	24.2756	41.5415	63.1775	78.6246	11.1655	4.74785	17.8292	15.9526	46.3003	12.4238	1.95966	7.54007e-06	5.30258e-05
HMJ22_RS06850	CDS	glnH	11119.5	10956.4	11159.4	7808.61	8649.42	5228.25	4740.73	3952.38	4090.14	9938.67	4502.87	1.14138	1.7818e-12	3.75385e-11
HMJ22_RS07015	CDS		206.732	1011.49	409.877	10.3007	22.8726	20.2375	30.861	2.13951	9.11578	332.253	15.5884	4.40703	0.000262397	0.00120577
HMJ22_RS07025	CDS		145.533	137.562	156.473	186.099	175.118	40.475	56.9742	33.519	54.125	160.157	46.2733	1.81635	3.88442e-18	1.78827e-16
HMJ22_RS07030	CDS	betI	38.8088	72.8269	49.8498	35.709	50.0338	4.88491	4.74785	9.2712	14.2434	49.4457	8.28684	2.43961	2.8951e-11	5.19656e-10
HMJ22_RS07035	CDS	betB	873.945	776.821	743.594	837.102	811.978	100.49	94.1656	144.773	166.933	808.688	126.59	2.67389	1.85811e-45	5.77407e-43
HMJ22_RS07040	CDS	betA	1647.14	1691.2	1383.33	1806.74	1741.89	212.145	259.549	346.6	381.723	1654.06	300.004	2.46137	1.30682e-38	2.7073e-36
HMJ22_RS07050	CDS		226.882	339.859	279.713	212.881	213.716	71.878	44.3132	82.0145	79.7631	254.61	69.4922	1.82475	1.93642e-16	7.13177e-15
HMJ22_RS07055	CDS		707.515	1149.05	1143.78	352.283	819.84	167.483	134.522	358.724	332.726	834.493	248.364	1.74015	1.27176e-06	1.07173e-05
HMJ22_RS07060	CDS		19570.1	28054.6	20218.3	8289.3	14861.5	6013.32	4307.09	10092.8	10460.9	18198.7	7718.53	1.23687	0.000217018	0.00102471
HMJ22_RS07065	CDS		594.82	655.442	474.958	356.404	448.875	203.073	174.088	285.981	260.939	506.1	231.02	1.10962	3.78977e-07	3.50237e-06
HMJ22_RS07070	CDS		743.339	744.453	609.276	697.013	686.893	291.001	199.41	351.593	342.981	696.195	296.246	1.22705	1.95339e-11	3.57068e-10
HMJ22_RS07130	CDS	cynS	92.5442	97.1026	47.0804	46.6964	46.46	32.1008	36.4002	21.3951	24.4987	65.9767	28.5987	1.12849	0.000305083	0.0013679
HMJ22_RS07360	CDS		1711.32	2257.64	1816.75	1277.28	1629.67	732.039	681.316	799.463	830.676	1738.53	760.873	1.18057	3.65242e-12	7.26392e-11
HMJ22_RS07545	CDS	hisL	92.5442	80.9188	152.319	39.1426	88.6314	30.0073	9.49569	50.635	41.5908	90.7112	32.9322	1.4586	0.000735204	0.00291968
HMJ22_RS07645	CDS		77.6177	16.1838	73.3901	29.5286	40.7418	16.0504	27.6958	21.3951	27.3474	47.4924	23.1222	1.13154	0.00218656	0.00751704
HMJ22_RS07730	CDS	eco	726.173	1229.97	930.531	540.443	573.96	525.477	339.471	330.197	326.459	800.214	380.401	1.05364	4.96745e-05	0.000283887
HMJ22_RS07915	CDS	infA	381.372	388.41	798.982	429.882	523.211	258.9	128.983	208.959	219.349	504.371	204.048	1.3129	7.58121e-07	6.65968e-06
HMJ22_RS07975	CDS	pflA	721.695	954.842	576.043	537.696	598.977	321.008	320.48	221.083	225.616	677.85	272.047	1.29436	5.2644e-10	7.90773e-09
HMJ22_RS08005	CDS	aroA	508.993	347.951	479.112	504.734	448.16	195.396	239.766	153.331	177.188	457.79	191.421	1.28494	1.14242e-13	2.92788e-12
HMJ22_RS08010	CDS	cmk	3456.97	5996.09	3036.69	2502.38	2778.31	1855.57	1610.31	1621.75	1779.29	3554.09	1716.73	1.04334	1.45912e-05	9.57092e-05
HMJ22_RS08045	CDS		2621.09	4337.25	4282.93	1875.41	2930.55	485.7	469.246	430.041	347.539	3209.45	433.131	2.88598	1.17126e-31	1.4932e-29
HMJ22_RS08050	CDS		439.585	614.983	790.674	319.321	664.021	89.3241	95.7483	158.324	125.342	565.717	117.184	2.26498	2.72065e-16	9.67307e-15
HMJ22_RS08110	CDS		178.371	258.94	203.554	172.365	226.582	103.979	94.1656	99.1306	81.4723	207.962	94.6868	1.09151	4.42853e-10	6.69259e-09
HMJ22_RS08235	CDS		133.592	169.93	149.55	175.798	167.256	70.4823	64.0959	60.6194	79.1934	159.225	68.5977	1.19943	1.22205e-11	2.3191e-10
HMJ22_RS08295	CDS	rlmI	90.3052	80.9188	109.393	103.007	113.648	45.3599	40.3567	49.9219	60.9618	99.4544	49.1501	1.04606	2.43445e-07	2.34776e-06
HMJ22_RS08300	CDS		44.0331	89.0107	90.0067	15.1077	38.5975	13.259	15.0349	21.3951	18.8013	55.3511	17.1226	1.58846	0.000329214	0.00145111
HMJ22_RS08340	CDS		73.1397	64.7351	88.622	49.4433	59.3258	35.5901	34.8175	23.5346	38.1723	67.0532	33.0286	1.00916	7.97263e-05	0.000426235
HMJ22_RS08350	CDS		48.5111	89.0107	69.2359	52.1901	56.4668	23.0289	34.0262	25.6741	31.3355	63.0829	28.5162	1.03587	3.27329e-05	0.00019689
HMJ22_RS08525	CDS		384.357	428.87	383.567	210.134	245.166	140.965	194.662	131.936	129.9	330.419	149.366	1.11978	4.10272e-06	3.12864e-05
HMJ22_RS08565	tRNA		9.70221	32.3675	45.6957	6.86712	16.4397	5.58275	8.70439	4.99219	6.2671	22.2145	6.38661	1.67281	0.00278581	0.00919725
HMJ22_RS08570	tRNA		79.1103	64.7351	235.402	34.3356	74.336	31.403	38.7741	27.1004	22.2197	97.5838	29.8743	1.72466	0.000125318	0.000637096
HMJ22_RS08665	CDS	mdoC	44.7794	89.0107	65.0817	42.5762	55.752	14.6547	11.0783	9.98437	14.8131	59.44	12.6326	2.10007	3.08462e-12	6.23445e-11
HMJ22_RS08670	CDS	mdoG	1271.74	1456.54	1150.7	960.711	1071.44	574.326	531.759	539.869	545.238	1182.23	547.798	1.09325	1.48888e-14	4.32906e-13
HMJ22_RS08675	CDS	mdoH	1069.48	712.086	884.835	1278.66	1140.77	334.267	413.854	410.072	418.187	1017.17	394.095	1.38448	1.47848e-14	4.32412e-13
HMJ22_RS08735	CDS		411.224	364.135	407.107	242.409	296.629	158.411	235.018	130.51	132.749	344.301	164.172	1.06379	6.87452e-06	4.86885e-05
HMJ22_RS08815	CDS	rne	3122.62	2306.19	2936.99	3695.2	3652.47	1300.78	1511.4	1467.7	1533.73	3142.69	1453.4	1.11901	1.85926e-12	3.88414e-11
HMJ22_RS08860	CDS	acpP	2821.85	5211.17	5356.09	927.062	2429.5	1116.55	933.743	1899.17	1641.98	3349.13	1397.86	1.25824	0.00171222	0.00608081
HMJ22_RS09000	tRNA		72.3934	16.1838	69.2359	38.4559	50.0338	25.8202	18.9914	17.8292	18.2316	49.2606	20.2181	1.40165	8.17515e-06	5.68487e-05
HMJ22_RS09120	CDS		70.1544	121.378	92.7761	50.8167	53.6077	42.5685	35.6089	24.2478	27.9171	77.7466	32.5856	1.14103	0.000104498	0.000541779
HMJ22_RS09295	CDS		54.4816	145.654	72.0053	36.3958	42.1714	18.8418	31.6523	24.9609	22.7895	70.1416	24.5611	1.33125	0.000216634	0.00102386
HMJ22_RS09550	CDS	purB	593.328	534.064	577.427	538.382	526.07	305.656	258.758	247.47	292.845	553.854	276.182	1.0069	1.83704e-15	5.89274e-14
HMJ22_RS09605	CDS		81.3493	113.286	67.8512	39.1426	55.752	24.4245	29.2784	12.1239	21.0803	71.4763	21.7268	1.61723	1.06616e-06	9.13955e-06
HMJ22_RS09760	CDS		67.9155	72.8269	124.625	38.4559	84.3428	39.7771	21.3653	39.9375	39.8816	77.6331	35.2404	1.12949	0.000743239	0.00294688
HMJ22_RS10110	CDS		41.0478	16.1838	74.7748	54.937	52.8929	23.0289	18.2001	27.8136	24.4987	47.9673	23.3853	1.14952	7.02723e-05	0.000383528
HMJ22_RS10130	CDS		281.364	412.686	206.323	90.646	168.686	80.9499	117.114	79.1618	73.496	231.941	87.6803	1.3544	8.51651e-05	0.000453849
HMJ22_RS10155	CDS	infC	6086.27	8795.88	6317.08	2693.29	4388.68	1940.01	1905.47	2130.24	1984.39	5656.24	1990.03	1.5044	3.99305e-08	4.38265e-07
HMJ22_RS10240	CDS	arnF	45.5258	72.8269	60.9276	59.0573	45.7452	10.4677	19.7827	26.3873	28.4868	56.8166	21.2811	1.3447	9.56153e-06	6.49453e-05
HMJ22_RS10290	CDS		3.73162	40.4594	12.4625	2.06014	5.71815	2.09353	0	0	0.569736	12.8864	0.665817	3.79195	0.000347706	0.00152317
HMJ22_RS10480	CDS	eptA	90.3052	105.194	196.63	140.089	122.94	86.5327	71.2177	47.7824	54.125	131.032	64.9144	1.03265	0.000129557	0.000655296
HMJ22_RS10545	CDS		208.224	291.308	217.401	98.8866	112.219	105.374	73.5916	59.9062	51.2763	185.608	72.5372	1.30563	6.37504e-05	0.000353363
HMJ22_RS10640	CDS	dtpA	361.967	428.87	420.954	577.525	558.235	172.368	171.714	199.687	197.699	469.51	185.367	1.35024	9.98997e-14	2.58699e-12
HMJ22_RS10665	CDS		128.368	129.47	174.474	76.2251	125.085	55.8275	33.2349	92.712	60.9618	126.724	60.6841	1.05087	0.00062486	0.00252997
HMJ22_RS10670	CDS	rsxC	52.2427	32.3675	24.9249	72.7915	47.8895	15.3526	27.6958	18.5424	22.2197	46.0432	20.9526	1.21483	0.000317563	0.00141235
HMJ22_RS10920	CDS		36.5699	72.8269	88.622	31.5888	35.0237	5.58275	8.70439	8.55803	5.12763	52.9262	6.9932	2.84651	1.35428e-11	2.55056e-10
HMJ22_RS10930	CDS		5.22427	16.1838	34.618	12.3608	25.0169	3.48922	0.791308	4.27902	1.70921	18.6807	2.56719	2.8579	9.33034e-06	6.38987e-05
HMJ22_RS11020	CDS		17.9118	24.2756	24.9249	12.3608	7.86246	7.67629	8.70439	2.13951	3.98816	17.4671	5.62708	1.52872	0.00264469	0.00880148
HMJ22_RS11115	CDS		128.368	339.859	138.472	34.3356	55.0372	24.4245	22.1566	26.3873	19.9408	139.214	23.2273	2.4984	3.21367e-07	3.0091e-06
HMJ22_RS11135	CDS		2.9853	24.2756	4.15415	2.74685	5.00338	0	0	0.713169	0	7.83307	0.178292	4.62979	0.000225926	0.00105872
HMJ22_RS11195	CDS		25.375	0	42.9263	37.0825	26.4465	13.9569	11.8696	13.5502	15.3829	26.366	13.6899	1.13382	0.0011494	0.00429709
HMJ22_RS11240	CDS		18.6581	24.2756	74.7748	65.9244	57.8963	9.76982	3.16523	10.6975	6.83684	48.3058	7.61736	2.71896	4.21805e-09	5.3913e-08
HMJ22_RS11260	CDS		23.8824	32.3675	12.4625	23.3482	12.1511	8.37413	3.95654	9.2712	9.68552	20.8423	7.82185	1.27766	0.00230763	0.00787475
HMJ22_RS11330	CDS		56.7206	32.3675	84.4678	45.323	50.0338	36.9857	27.6958	23.5346	17.0921	53.7826	26.3271	1.09392	0.00034365	0.00150939
HMJ22_RS11390	CDS		61.9449	72.8269	55.3887	52.8768	44.3157	15.3526	18.9914	20.6819	18.8013	57.4706	18.4568	1.5706	6.36561e-10	9.44771e-09
HMJ22_RS11985	CDS		11.1949	16.1838	23.5402	10.9874	16.4397	4.18707	5.53916	4.27902	3.41842	15.6692	4.35591	1.8137	0.000104852	0.000543046
HMJ22_RS12265	CDS	hrpA	422.419	428.87	355.873	401.04	398.126	173.763	182.792	181.145	198.838	401.266	184.135	1.11355	1.77294e-18	8.55831e-17
HMJ22_RS12275	CDS		75.3787	121.378	44.311	41.8895	47.8895	23.7267	33.2349	18.5424	25.6381	66.1694	25.2855	1.2369	0.000126927	0.000644191
HMJ22_RS12340	CDS		85.0809	153.746	137.087	50.8167	75.7655	40.475	26.9045	22.1083	26.7776	100.499	29.0663	1.70596	2.23144e-07	2.16271e-06
HMJ22_RS12470	CDS		332.114	323.675	365.566	396.92	388.834	44.662	37.1915	31.3795	47.2881	361.422	40.1303	3.17835	1.99172e-71	1.65047e-68
HMJ22_RS12515	CDS		21.6434	80.9188	52.6193	26.7818	35.0237	11.1655	6.33046	18.5424	10.2553	43.3974	11.5734	1.72564	3.30085e-05	0.000198068
HMJ22_RS12620	CDS		951.563	2087.71	1092.54	797.273	901.324	639.923	270.627	437.173	401.094	1166.08	437.204	1.40103	4.4767e-06	3.34206e-05
HMJ22_RS12705	CDS		9084.25	9661.71	10498.9	7942.51	8808.82	2811.61	3543.48	2202.98	2382.64	9199.24	2735.18	1.74958	1.65644e-25	1.28685e-23
HMJ22_RS12765	CDS	yciA	76.125	72.8269	77.5442	65.9244	54.3225	27.9138	23.7392	24.9609	27.3474	69.3486	25.9903	1.39106	1.04613e-09	1.49036e-08
HMJ22_RS12845	CDS		56.7206	80.9188	171.705	77.5985	66.4735	62.806	26.9045	34.2321	34.1842	90.6833	39.5317	1.195	0.000967109	0.00370737
HMJ22_RS12905	CDS	hns	9664.15	14185.1	6783.73	2869.77	5324.32	3473.17	3416.87	2160.9	2309.14	7765.41	2840.02	1.44958	5.88211e-05	0.000328975
HMJ22_RS12910	CDS		325.397	404.594	360.027	305.587	337.371	138.871	122.653	188.277	166.933	346.595	154.183	1.14203	1.48967e-11	2.79496e-10
HMJ22_RS12945	tRNA		550.787	420.778	774.057	238.289	401.7	131.195	340.262	196.835	147.562	477.122	203.963	1.22914	0.000348927	0.00152717
HMJ22_RS13075	CDS		126.129	210.389	239.556	151.077	167.971	62.806	70.4264	85.5803	77.4842	179.024	74.0742	1.23736	2.99189e-08	3.38854e-07
HMJ22_RS13180	CDS	rnd	199.268	250.848	222.94	196.4	210.142	80.2521	99.7048	111.254	82.0421	215.92	93.3133	1.18094	1.66543e-12	3.52362e-11
HMJ22_RS13215	CDS	mdtJ	33.5846	0	36.0027	26.0951	37.168	4.88491	6.33046	19.2556	6.83684	26.5701	9.32695	1.67991	0.000301293	0.00135937
HMJ22_RS13315	CDS		233.599	97.1026	282.482	337.176	318.787	115.144	72.009	171.874	154.399	253.829	128.356	1.02222	0.00100563	0.00384025
HMJ22_RS13325	CDS	cmoB	49.2574	105.194	99.6997	61.1174	53.6077	17.4461	20.574	39.2243	29.6263	73.7753	26.7177	1.37607	2.07061e-05	0.000130648
HMJ22_RS13385	CDS		1143.37	1780.21	900.067	474.518	667.594	602.937	470.828	231.067	283.159	993.152	396.998	1.31155	0.000321638	0.00142657
HMJ22_RS13425	CDS	cspC	2497.95	2379.01	3058.84	1097.37	1824.81	528.966	361.628	401.514	418.187	2171.59	427.574	2.34258	4.56082e-19	2.33777e-17
HMJ22_RS13435	CDS		140.309	388.41	168.936	66.6111	97.2086	42.5685	15.8262	28.5268	22.2197	172.295	27.2853	2.58225	2.92025e-09	3.86156e-08
HMJ22_RS13570	CDS		432.122	1537.46	551.118	223.868	263.75	263.785	128.192	161.176	136.737	601.663	172.473	1.78837	0.00285821	0.00939741
HMJ22_RS13595	CDS		275.394	598.799	344.795	90.646	108.645	84.4392	57.7655	62.0457	38.7421	283.656	60.7481	2.20027	0.000137046	0.000688972
HMJ22_RS13820	CDS		13.4338	40.4594	5.53887	6.18041	12.1511	0	0.791308	2.85268	1.70921	15.5527	1.3383	3.15629	3.39647e-05	0.000201518
HMJ22_RS13825	CDS		309.724	315.583	378.028	731.349	642.577	242.152	265.879	211.811	233.022	475.452	238.216	1.01544	0.000168	0.000823764
HMJ22_RS13990	CDS	fliD	186.581	234.665	186.937	88.5859	118.652	60.0146	54.6002	74.8828	65.5197	163.084	63.7543	1.295	2.02036e-06	1.64138e-05
HMJ22_RS14005	CDS		150.757	202.297	152.319	97.5131	107.93	67.6909	50.6437	69.1774	74.0657	142.163	65.3944	1.0417	8.81635e-06	6.07973e-05
HMJ22_RS14065	CDS	fliM	8.20956	16.1838	23.5402	13.7342	15.0102	3.48922	1.58262	6.41852	6.2671	15.3356	4.43937	1.71123	0.000681042	0.00273517
HMJ22_RS14215	CDS	cheY	23.136	48.5513	30.4638	18.5412	15.7249	9.07198	7.91308	14.9766	4.55789	27.2835	9.12988	1.39275	0.00105964	0.00402177
HMJ22_RS14270	CDS	ydgT	292.559	307.492	275.559	136.656	203.709	113.051	123.444	116.96	116.796	243.195	117.563	1.01639	1.63349e-05	0.000105751
HMJ22_RS14375	CDS		2432.27	3827.46	2931.45	2181	2493.83	1529.67	823.752	1472.69	1498.41	2773.2	1331.13	1.05337	3.2749e-06	2.52839e-05
HMJ22_RS14455	CDS		175.386	339.859	256.173	41.8895	150.102	48.8491	43.5219	79.1618	59.2526	192.682	57.6964	1.69611	6.71448e-05	0.000368888
HMJ22_RS14595	CDS	dsrB	63.4375	72.8269	91.3914	35.0223	58.6111	40.475	15.8262	17.1161	13.6737	64.2579	21.7727	1.53239	4.5957e-05	0.000264772
HMJ22_RS14600	CDS	cspE	1432.2	1707.39	3126.69	710.061	1731.89	191.209	102.87	381.546	319.622	1741.64	248.812	2.80622	1.90207e-12	3.95694e-11
HMJ22_RS14665	CDS		360.474	558.34	390.49	351.597	338.086	172.368	181.21	149.766	147.562	399.797	162.726	1.24732	2.78885e-13	6.83063e-12
HMJ22_RS14870	CDS		5.97059	40.4594	11.0777	4.12027	5.00338	1.39569	0.791308	0.713169	0	13.3263	0.725041	3.74929	0.00011226	0.000575418
HMJ22_RS14875	CDS		129.86	129.47	166.166	87.8992	96.4938	43.2663	40.3567	50.635	49.5671	121.978	45.9563	1.38215	5.18546e-09	6.57707e-08
HMJ22_RS15040	tRNA		2.9853	32.3675	8.30831	7.55384	7.14769	1.39569	0	0	1.70921	11.6725	0.776224	3.3597	0.000230998	0.00107843
HMJ22_RS15715	CDS	tmaR	458.989	461.237	509.576	366.018	428.862	299.375	200.201	202.54	176.618	444.936	219.684	1.0134	1.0304e-07	1.04341e-06
HMJ22_RS15745	CDS		34.3309	16.1838	22.1555	24.0349	27.876	9.07198	15.8262	9.2712	10.825	24.9162	11.2486	1.25334	0.000229853	0.0010751
HMJ22_RS15820	CDS		47.0184	32.3675	55.3887	62.4908	43.6009	19.5396	26.1132	20.6819	21.65	48.1733	21.9962	1.20809	2.55008e-06	2.02367e-05
HMJ22_RS15940	CDS	rsuA	79.1103	97.1026	106.623	98.1999	117.222	57.2232	46.6872	47.0692	43.8697	99.6516	48.7123	1.0369	3.3856e-07	3.15229e-06
HMJ22_RS15950	CDS	rplY	1249.35	1213.78	1321.02	322.068	886.314	314.728	441.55	464.273	451.231	998.506	417.946	1.25198	0.000144148	0.000718859
HMJ22_RS15960	CDS		54.4816	40.4594	83.0831	63.1775	67.9031	30.7051	7.91308	31.3795	29.6263	61.8209	24.906	1.34992	7.86647e-05	0.000421466
HMJ22_RS15975	ncRNA		2.9853	8.09188	6.92359	8.24055	11.4363	2.09353	1.58262	0	0.569736	7.53552	1.06147	2.85184	0.000527565	0.00218953
HMJ22_RS15980	CDS		23.8824	89.0107	44.311	2.74685	23.5874	5.58275	8.70439	2.85268	6.2671	36.7077	5.85173	2.47034	0.000148816	0.000736965
HMJ22_RS16070	CDS	rcsD	410.478	428.87	430.647	191.593	315.928	182.835	185.957	137.642	158.387	355.503	166.205	1.07876	9.517e-06	6.48114e-05
HMJ22_RS16325	CDS	pta	1769.53	1310.88	1429.03	2064.94	2004.21	601.542	636.212	514.908	564.039	1715.72	579.175	1.57642	1.0337e-20	5.90756e-19
HMJ22_RS16705	CDS		16.4191	16.1838	9.69303	2.74685	9.292	2.09353	0.791308	2.85268	3.98816	10.867	2.43142	1.99974	0.00250539	0.0084054
HMJ22_RS16770	CDS	ypdK	2192.7	2694.6	3442.41	1816.35	1964.19	1339.16	805.551	572.675	642.093	2422.05	839.871	1.52645	2.22304e-08	2.55265e-07
HMJ22_RS16810	CDS		963.504	752.545	515.115	754.01	737.642	143.756	165.383	255.315	286.008	744.563	212.615	1.80732	1.59025e-13	3.9933e-12
HMJ22_RS16935	CDS	budA	1094.86	1084.31	488.805	748.516	922.767	303.562	362.419	451.436	429.012	867.852	386.607	1.15867	1.36445e-06	1.14595e-05
HMJ22_RS17045	CDS		333.607	364.135	55.3887	96.8264	95.0643	69.7844	58.5568	59.1931	58.6829	189.004	61.5543	1.57769	0.000559094	0.0023069
HMJ22_RS17080	CDS	hemF	58.9596	56.6432	77.5442	38.4559	69.3326	23.7267	39.5654	22.1083	33.0447	60.1871	29.6113	1.02389	0.00035519	0.00155185
HMJ22_RS17170	CDS		194.791	210.389	252.019	192.966	213.001	94.9068	86.2526	65.6116	67.2289	212.633	78.5	1.43701	3.77868e-15	1.15973e-13
HMJ22_RS17260	CDS		49.2574	72.8269	49.8498	24.7216	40.7418	20.9353	11.0783	12.837	10.825	47.4795	13.9189	1.65104	1.98806e-06	1.61778e-05
HMJ22_RS17315	CDS		234.346	275.124	211.862	168.931	175.118	86.5327	68.0525	78.4486	70.0776	213.076	75.7778	1.4411	3.65465e-14	9.92948e-13
HMJ22_RS17370	CDS	hda	65.6765	80.9188	58.1582	46.6964	58.6111	33.4965	34.0262	24.2478	21.0803	62.0122	28.2127	1.07334	2.20586e-05	0.000138171
HMJ22_RS17405	CDS	speG	223.897	299.4	180.013	125.668	126.514	99.7917	96.5396	71.3169	96.2855	191.099	90.9834	1.00213	0.000114954	0.000588623
HMJ22_RS17410	CDS		39.5552	145.654	88.622	31.5888	51.4634	25.1224	10.287	12.1239	11.9645	71.3766	14.8744	2.12092	1.10968e-06	9.41524e-06
HMJ22_RS17415	CDS		58.9596	210.389	114.932	10.9874	35.7385	14.6547	17.4088	17.8292	11.3947	86.2012	15.3219	2.4308	0.000917583	0.00353663
HMJ22_RS17420	CDS		43.2868	64.7351	55.3887	19.9147	40.0271	7.67629	10.287	12.1239	10.2553	44.6705	10.0856	2.03741	3.73248e-08	4.14238e-07
HMJ22_RS17425	CDS		73.1397	161.838	76.1595	15.7944	35.7385	29.3095	31.6523	9.2712	9.11578	72.5339	19.8372	1.77136	0.0012514	0.00464673
HMJ22_RS17430	CDS		58.9596	113.286	105.239	11.6741	40.7418	16.0504	26.9045	15.6897	18.8013	65.9801	19.3615	1.68516	0.000589573	0.00240867
HMJ22_RS17445	CDS		5.22427	8.09188	9.69303	8.24055	2.85908	0.697844	0	0.713169	0.569736	6.82176	0.495188	3.65934	0.000322595	0.00142954
HMJ22_RS17555	CDS	baeS	29.1066	40.4594	54.004	52.1901	35.0237	19.5396	19.7827	24.2478	17.6618	42.1568	20.308	1.05156	0.000286984	0.00130547
HMJ22_RS17735	CDS		62.6912	97.1026	103.854	45.323	80.0541	32.7987	25.3219	34.2321	35.3237	77.805	31.9191	1.2188	1.29959e-05	8.5811e-05
HMJ22_RS18000	CDS	mltF	67.1692	56.6432	98.315	81.0321	82.1985	33.4965	37.1915	29.2399	25.6381	77.0716	31.3915	1.35079	2.75324e-09	3.66019e-08
HMJ22_RS18200	CDS		1629.23	1764.03	1995.38	571.345	1315.18	253.317	553.124	559.125	583.98	1455.03	487.387	1.57483	2.3264e-06	1.86864e-05
HMJ22_RS18315	CDS	acpS	60.4522	32.3675	45.6957	24.7216	35.0237	16.7483	23.7392	13.5502	24.4987	39.6522	19.6341	1.0414	0.00207376	0.00717518
HMJ22_RS18555	CDS	asr	158.221	291.308	117.701	61.8041	75.0508	64.8995	66.4699	42.077	32.475	140.817	51.4803	1.36814	0.000533713	0.00220955
HMJ22_RS18640	CDS		79.1103	113.286	131.548	71.4181	114.363	70.4823	26.9045	51.3482	45.5789	101.945	48.5785	1.04285	0.000395543	0.00170216
HMJ22_RS18645	CDS	proV	94.7831	56.6432	109.393	79.6586	91.4905	32.1008	27.6958	29.2399	37.0329	86.3936	31.5174	1.51084	5.56576e-12	1.08949e-10
HMJ22_RS18650	CDS	proW	126.129	186.113	109.393	132.535	123.655	27.2159	23.7392	42.077	53.5552	135.565	36.6468	1.8216	2.95837e-12	6.07811e-11
HMJ22_RS18655	CDS	proX	682.886	517.88	527.578	569.285	575.389	169.576	152.722	208.245	194.85	574.604	181.348	1.67421	1.21495e-27	1.09832e-25
HMJ22_RS18680	CDS	mprA	56.7206	137.562	70.6206	39.8293	60.0406	28.6116	16.6175	25.6741	37.6026	72.9546	27.1264	1.26123	0.000183723	0.000891189
HMJ22_RS18710	CDS		43.2868	48.5513	48.4651	41.2027	30.7351	20.2375	19.7827	21.3951	18.2316	42.4482	19.9117	1.04379	7.34186e-05	0.000398078
HMJ22_RS18750	rRNA		16382.6	228960	53869.7	651.69	3235.76	898.126	1315.15	857.943	825.548	60619.9	974.193	5.95937	3.82805e-07	3.53118e-06
HMJ22_RS18755	CDS	gmhB	267.93	671.626	347.564	186.786	237.303	160.504	154.305	121.952	113.947	342.242	137.677	1.26173	6.31895e-05	0.000351037
HMJ22_RS18805	CDS		740.353	987.21	902.836	383.872	462.456	454.994	334.723	304.523	272.334	695.345	341.644	1.01036	0.000368543	0.00160315
HMJ22_RS18860	CDS	dnaE	604.522	695.902	634.201	589.886	530.359	295.886	222.358	300.244	272.904	610.974	272.848	1.14511	2.36961e-15	7.31784e-14
HMJ22_RS18865	CDS	rnhB	145.533	113.286	145.395	147.643	105.071	52.3383	76.7569	68.4643	53.5552	131.386	62.7787	1.0935	1.10852e-07	1.1157e-06
HMJ22_RS18890	CDS	skp	2090.45	1917.78	1315.48	1350.08	1471.71	686.679	991.509	661.108	626.14	1629.1	741.359	1.13196	3.17469e-08	3.57117e-07
HMJ22_RS18990	CDS	syd	123.143	202.297	132.933	140.089	107.215	77.4607	61.722	44.9297	60.9618	141.136	61.2686	1.12576	4.17572e-07	3.81648e-06
HMJ22_RS19010	CDS	rlmM	253.004	242.756	308.792	282.925	269.468	112.353	132.94	152.618	129.9	271.389	131.953	1.0557	4.96797e-12	9.76314e-11
HMJ22_RS19055	tRNA		17.1655	48.5513	23.5402	28.1552	19.2988	2.79138	12.6609	8.55803	9.68552	27.3422	8.42396	1.52064	0.000326041	0.00143968
HMJ22_RS19255	CDS		123.143	137.562	106.623	87.8992	87.9166	20.9353	39.5654	34.9453	26.2079	108.629	30.4135	1.79323	4.108e-13	9.72617e-12
HMJ22_RS19275	CDS		38.0625	121.378	52.6193	26.7818	44.3157	23.7267	27.6958	17.1161	16.5224	56.6315	21.2652	1.20355	0.00129098	0.0047517
HMJ22_RS19310	CDS		85.8273	186.113	96.9303	29.5286	56.4668	33.4965	48.2698	25.6741	37.0329	90.9732	36.1183	1.21149	0.00263902	0.00878849
HMJ22_RS19475	tRNA		6.71692	8.09188	6.92359	7.55384	11.4363	0.697844	0.791308	1.42634	2.84868	8.14451	1.44104	2.44829	0.000380372	0.0016474
HMJ22_RS19480	CDS	lysS	1152.32	1108.59	1167.32	1332.22	1323.75	589.678	588.733	606.194	642.093	1216.84	606.675	1.01315	1.96968e-19	1.04184e-17
HMJ22_RS19710	CDS		496.305	833.464	408.492	208.761	331.653	117.238	96.5396	139.781	143.574	455.735	124.283	1.84015	9.3127e-09	1.14611e-07
HMJ22_RS19715	CDS		1197.85	1157.14	938.839	1011.53	1100.74	363.577	341.054	566.257	524.158	1081.22	448.761	1.26503	9.95295e-12	1.90331e-10
HMJ22_RS19720	CDS		53.7353	113.286	76.1595	70.0447	81.4837	27.2159	30.861	36.3716	30.196	78.9419	31.1612	1.2414	2.49245e-07	2.39237e-06
HMJ22_RS19965	CDS	dksA	4746.62	6651.53	4138.92	2385.64	2883.38	1962.34	1373.71	1312.23	1246.01	4161.22	1473.57	1.49407	8.9888e-08	9.17707e-07
HMJ22_RS20015	CDS		160.46	161.838	275.559	285.672	262.32	60.7124	53.8089	89.1462	91.1578	229.17	73.7064	1.66103	4.41121e-11	7.72273e-10
HMJ22_RS20030	CDS	hpt	286.588	258.94	368.335	410.654	434.58	191.907	136.105	177.579	202.256	351.819	176.962	1.0171	2.80512e-07	2.67185e-06
HMJ22_RS20035	CDS	cueO	2391.22	2338.55	2694.66	2716.63	2588.18	626.664	704.264	1088.3	1170.24	2545.85	897.366	1.50528	6.34085e-14	1.68592e-12
HMJ22_RS20080	CDS	pdhR	828.42	712.086	1060.69	667.484	739.071	356.598	305.445	312.368	276.322	801.551	312.683	1.36378	2.03353e-15	6.35895e-14
HMJ22_RS20150	CDS	ruvX	30.5993	48.5513	44.311	36.3958	30.0203	7.67629	22.1566	21.3951	10.825	37.9755	15.5132	1.23422	0.000426722	0.00181649
HMJ22_RS20290	CDS		38.8088	105.194	34.618	3.43356	20.0135	8.37413	11.8696	8.55803	10.825	40.4137	9.90669	1.82749	0.00256196	0.00857781
HMJ22_RS20305	CDS		48.5111	16.1838	40.1568	39.1426	70.7621	16.7483	18.9914	18.5424	15.3829	42.9513	17.4162	1.44135	4.83757e-06	3.57391e-05
HMJ22_RS20315	CDS		21.6434	32.3675	37.3874	33.6489	22.8726	9.07198	13.4522	14.2634	17.6618	29.584	13.6124	1.0688	0.0012791	0.00471438
HMJ22_RS20515	CDS		214.941	194.205	175.859	166.871	221.578	93.5111	77.5482	78.4486	65.5197	194.691	78.7569	1.31177	4.45387e-13	1.03966e-11
HMJ22_RS20530	CDS	yqiA	134.338	194.205	175.859	93.3929	111.504	49.5469	78.3395	54.914	41.5908	141.86	56.0978	1.28548	1.43691e-06	1.20275e-05
HMJ22_RS20605	CDS		431.375	509.789	613.43	420.268	403.13	337.059	203.366	196.122	175.479	475.598	228.006	1.05385	3.20085e-06	2.47891e-05
HMJ22_RS20685	CDS		1268	2694.6	1877.68	339.923	828.417	281.929	356.88	442.165	455.789	1401.72	384.191	1.8626	0.000581247	0.00238249
HMJ22_RS20695	CDS		348.533	809.188	510.961	149.703	278.76	128.403	144.809	139.068	176.049	419.429	147.082	1.47857	5.03405e-05	0.000287033
HMJ22_RS20935	CDS	rplM	6899.02	12340.1	7208.84	3403.35	5564.48	3320.34	2460.97	3937.41	3849.71	7083.16	3392.11	1.0599	0.000478716	0.00200859
HMJ22_RS20965	CDS	ibaG	218.673	339.859	235.402	152.45	195.132	110.957	60.1394	77.7355	82.0421	228.303	82.7185	1.40547	1.02283e-08	1.2434e-07
HMJ22_RS21010	CDS	lptC	261.213	639.259	236.787	166.184	180.122	137.475	105.244	116.96	124.203	296.713	120.97	1.23047	0.000249428	0.00115471
HMJ22_RS21030	CDS	hpf	811.254	1618.38	913.914	208.761	413.851	328.685	146.392	226.075	246.126	793.231	236.819	1.73541	0.00202188	0.00701519
HMJ22_RS21035	CDS	ptsN	231.36	323.675	191.091	158.631	172.974	122.123	115.531	73.4565	72.3565	215.546	95.8667	1.11454	8.28927e-06	5.74815e-05
HMJ22_RS21190	CDS		22.3897	0	31.8485	22.6615	20.7283	6.2806	7.12177	9.98437	9.68552	19.5256	8.26807	1.43193	0.000227786	0.00106644
HMJ22_RS21225	CDS	mreD	19.4044	24.2756	23.5402	24.7216	23.5874	3.48922	4.74785	13.5502	11.9645	23.1059	8.43794	1.42122	0.000526749	0.00218877
HMJ22_RS21285	CDS		163.445	250.848	90.0067	76.2251	85.0575	69.0866	56.1829	50.635	62.1013	133.117	59.5014	1.06019	0.000970515	0.00371617
HMJ22_RS21295	tRNA		29.1066	24.2756	38.7721	6.18041	24.3022	6.97844	4.74785	7.84486	7.40657	24.5274	6.74443	1.83206	0.000199733	0.000956715
HMJ22_RS21320	CDS	fis	249.272	283.216	372.489	356.404	363.818	183.533	79.9221	169.734	182.885	325.04	154.019	1.08413	1.56747e-05	0.000101742
HMJ22_RS21410	CDS		20.8971	64.7351	41.5415	24.0349	22.8726	12.5612	3.95654	19.9687	11.9645	34.8162	12.1127	1.33028	0.00235927	0.00802895
HMJ22_RS21510	CDS		2103.89	4329.16	2097.85	738.216	1403.81	821.363	777.064	407.22	375.456	2134.58	595.276	1.83902	0.000482971	0.00202473
HMJ22_RS21530	CDS	plsB	491.827	534.064	466.65	475.205	571.815	261.692	227.105	208.245	259.8	507.912	239.211	1.07947	9.68292e-15	2.86568e-13
HMJ22_RS21565	CDS		296.291	283.216	225.709	236.916	223.723	43.9642	41.9393	42.7902	59.2526	253.171	46.9866	2.40484	1.32371e-36	2.43758e-34
HMJ22_RS21590	CDS	malG	67.1692	8.09188	72.0053	82.4055	60.0406	28.6116	37.1915	25.6741	35.3237	57.9425	31.7002	1.02687	0.000307593	0.00137655
HMJ22_RS21625	CDS		56.7206	64.7351	70.6206	43.9496	52.1782	30.7051	27.6958	23.5346	23.3592	57.6408	26.3237	1.08693	9.52879e-06	6.48114e-05
HMJ22_RS21735	rRNA		1868.05	23118.5	3364.86	135.282	605.409	215.634	538.089	141.208	164.654	5818.42	264.896	4.45654	0.000209112	0.000991139
HMJ22_RS21740	tRNA		91.7978	145.654	307.407	218.375	179.407	68.3887	37.9828	85.5803	58.1131	188.528	62.5162	1.60375	1.48773e-06	1.23695e-05
HMJ22_RS21745	rRNA		2970.37	28256.9	7602.1	174.425	999.247	318.915	723.255	135.502	224.476	8000.6	350.537	4.51209	0.000109869	0.000565793
HMJ22_RS21790	CDS	rsmB	84.3346	24.2756	87.2372	115.368	105.786	43.2663	32.4436	36.3716	34.1842	83.4002	36.5664	1.31621	4.52054e-07	4.10898e-06
HMJ22_RS21805	CDS		54.4816	97.1026	120.47	23.3482	34.3089	16.7483	14.2435	29.9531	19.371	65.9424	20.079	1.64203	0.000244076	0.00113416
HMJ22_RS21820	CDS	rplQ	1178.45	801.096	1379.18	1698.93	1588.93	473.836	406.732	646.132	681.975	1329.32	552.169	1.2769	6.21664e-08	6.52091e-07
HMJ22_RS21845	CDS	rpmJ	475.408	793.005	722.823	194.34	558.949	128.403	150.349	340.895	274.043	548.905	223.423	1.28441	0.000622496	0.00252245
HMJ22_RS21905	CDS	rpsQ	565.714	396.502	542.809	332.369	517.493	118.634	159.053	215.377	216.5	470.977	177.391	1.41666	1.24425e-09	1.75253e-08
HMJ22_RS21910	CDS	rpmC	63.4375	186.113	105.239	71.4181	74.336	26.5181	35.6089	62.7589	23.3592	100.109	37.0613	1.32709	0.000211305	0.00100058
HMJ22_RS21920	CDS	rpsC	4616.01	4296.79	4287.09	4452.64	5071.29	1667.15	1391.91	2265.03	2318.26	4544.76	1910.59	1.25074	6.01947e-13	1.37288e-11
HMJ22_RS21970	CDS	tuf	8395.4	8787.78	7797.35	6124.1	9062.56	3220.55	3326.66	4318.95	4443.37	8033.44	3827.38	1.06876	1.89622e-10	3.03152e-09
HMJ22_RS22015	CDS		32.0919	24.2756	29.0791	35.0223	48.6043	15.3526	8.70439	16.4029	17.6618	33.8147	14.5304	1.28188	6.10695e-05	0.000340401
HMJ22_RS22075	CDS	tauA	257.482	364.135	18.0013	30.2153	42.1714	20.9353	11.0783	12.837	13.6737	142.401	14.6311	3.25642	0.000290131	0.00131498
HMJ22_RS22220	CDS	aroK	1393.39	2144.35	1658.89	1054.79	1481.72	631.549	716.134	726.72	687.102	1546.63	690.376	1.15072	1.96488e-09	2.65472e-08
HMJ22_RS22320	CDS		476.155	647.351	441.725	455.977	456.738	224.706	255.592	234.633	243.847	495.589	239.695	1.00633	7.43001e-13	1.67158e-11
HMJ22_RS22325	CDS	feoA	56.7206	105.194	130.163	61.8041	60.7554	46.7556	16.6175	42.7902	36.4631	82.9276	35.6566	1.16267	0.000792816	0.00312105
HMJ22_RS22495	CDS		136.577	194.205	156.473	63.1775	61.4701	43.9642	22.1566	36.3716	29.0566	122.381	32.8873	1.82736	3.5258e-07	3.27669e-06
HMJ22_RS22530	CDS		185.088	105.194	177.244	116.054	122.94	53.734	49.0611	39.2243	43.3	141.304	46.3298	1.64521	7.22007e-13	1.63174e-11
HMJ22_RS22535	CDS		57.4669	32.3675	92.7761	87.2125	55.752	29.3095	33.2349	39.2243	34.7539	65.115	34.1307	1.01774	0.000120616	0.000615092
HMJ22_RS22540	CDS		50.0037	105.194	59.5429	21.2881	40.7418	11.8634	14.2435	19.2556	23.3592	55.3542	17.1804	1.51642	0.000107352	0.000554838
HMJ22_RS22545	CDS		4188.37	5049.33	5020.99	2810.71	3271.5	1386.62	1056.4	1549.72	1581.59	4068.18	1393.58	1.54256	3.62797e-13	8.71413e-12
HMJ22_RS22555	CDS		131.353	169.93	126.009	107.127	132.947	46.0577	49.8524	67.7511	69.5079	133.473	58.2923	1.13626	3.33126e-08	3.73041e-07
HMJ22_RS22560	CDS		170.908	121.378	153.704	135.282	125.085	63.5038	68.8438	84.8672	64.3802	141.271	70.3987	1.03131	3.76511e-08	4.16003e-07
HMJ22_RS22770	CDS		118.666	210.389	184.167	111.247	149.387	68.3887	82.296	62.7589	52.9855	154.771	66.6073	1.15721	6.86387e-07	6.07245e-06
HMJ22_RS22800	CDS		110.456	64.7351	119.086	92.7062	95.0643	45.3599	53.8089	27.8136	36.4631	96.4094	40.8614	1.29841	5.13417e-08	5.53733e-07
HMJ22_RS22830	CDS	ilvC	1102.32	979.118	911.144	1359	1305.17	549.901	527.802	567.683	578.852	1131.35	556.06	1.03446	1.71018e-11	3.17276e-10
HMJ22_RS22880	CDS	ilvL	70.1544	137.562	123.24	28.8419	45.7452	22.331	21.3653	16.4029	9.68552	81.1087	17.4462	2.13693	8.12144e-07	7.10912e-06
HMJ22_RS22910	tRNA		203	153.746	404.338	190.906	338.801	110.259	93.3743	92.712	107.11	258.158	100.864	1.38356	2.59925e-07	2.48529e-06
HMJ22_RS22915	rRNA	rrf	116.427	291.308	290.791	195.026	240.877	83.0435	144.018	91.9989	108.25	226.886	106.828	1.05837	0.00014116	0.000706082
HMJ22_RS22920	rRNA		1197.1	12323.9	2833.13	209.447	646.866	238.663	402.776	192.556	162.945	3442.1	249.235	3.78639	0.000196549	0.000946021
HMJ22_RS22935	rRNA		13763.7	283572	52368.7	1801.25	9647.95	4833.97	8808.84	1820.72	1288.74	72230.7	4188.07	4.1082	0.00186452	0.00655615
HMJ22_RS22945	CDS	btuB	488.842	736.361	394.645	347.476	431.006	205.166	260.34	200.401	222.767	479.666	222.169	1.06957	4.16955e-07	3.81648e-06
HMJ22_RS23035	CDS	metJ	353.011	574.524	275.559	164.124	210.142	179.346	117.114	79.875	78.0539	315.472	113.597	1.43567	4.44263e-05	0.000256846
HMJ22_RS23080	CDS	zapB	413.463	614.983	618.969	293.913	474.607	243.548	99.7048	227.501	190.292	483.187	190.261	1.32958	3.04162e-06	2.38156e-05
HMJ22_RS23130	CDS		513.471	428.87	84.4678	111.934	110.789	46.7556	45.8959	40.6507	39.8816	249.906	43.2959	2.51538	3.39112e-05	0.000201518
HMJ22_RS23155	CDS		522.427	1278.52	688.205	70.7314	265.179	107.468	183.583	109.828	107.68	565.012	127.14	2.14288	0.00211353	0.00730264
HMJ22_RS23160	CDS		1255.32	1367.53	1502.42	789.719	991.385	717.384	446.298	308.089	346.97	1181.27	454.685	1.37354	3.86536e-07	3.55899e-06
HMJ22_RS23170	CDS		200.015	169.93	238.171	212.881	220.149	106.072	86.2526	112.681	94.0065	208.229	99.753	1.09245	6.99415e-12	1.35839e-10
HMJ22_RS23175	CDS		164.191	153.746	160.627	153.824	158.679	77.4607	80.7134	73.4565	65.5197	158.213	74.2876	1.10071	1.62131e-12	3.44495e-11
HMJ22_RS23210	CDS		11.9412	16.1838	5.53887	15.7944	17.1545	2.79138	4.74785	5.70536	5.69736	13.3225	4.73549	1.47448	0.00219784	0.00754171
HMJ22_RS23230	CDS		27.614	16.1838	23.5402	19.2279	19.2988	5.58275	3.16523	2.13951	7.40657	21.1729	4.57352	2.22288	3.24049e-07	3.02852e-06
HMJ22_RS23270	CDS		5.97059	0	5.53887	4.12027	5.00338	0.697844	0	1.42634	0	4.12662	0.531046	3.21678	0.00260963	0.00871396
HMJ22_RS23285	CDS		289.574	356.043	228.478	256.144	258.746	145.849	119.487	105.549	135.028	277.797	126.478	1.09217	1.58344e-10	2.56123e-09
HMJ22_RS23290	CDS		275.394	331.767	218.785	230.735	245.881	96.3025	117.905	94.1384	110.529	260.512	104.719	1.27117	1.9215e-14	5.45924e-13
HMJ22_RS23295	CDS		35.8235	64.7351	26.3096	17.8545	31.4498	10.4677	14.2435	10.6975	6.2671	35.2345	10.419	1.58644	4.05541e-05	0.000236107
HMJ22_RS23365	CDS		59.7059	97.1026	59.5429	24.0349	44.3157	23.0289	14.2435	27.8136	26.7776	56.9404	22.9659	1.16786	0.00105131	0.00399625
HMJ22_RS23370	CDS		176.132	703.994	303.253	26.7818	85.7723	35.5901	12.6609	31.3795	34.1842	259.187	28.4537	3.16638	0.000132346	0.000668044
HMJ22_RS23500	CDS	rfaQ	205.239	242.756	214.631	175.112	182.266	99.7917	103.661	89.1462	68.9381	204.001	90.3843	1.14296	3.54225e-10	5.45726e-09
HMJ22_RS23515	CDS		372.416	396.502	350.334	209.447	271.612	110.957	140.061	89.1462	105.401	320.062	111.392	1.49881	2.20154e-11	4.00955e-10
HMJ22_RS23545	CDS	rpmB	2285.99	2524.67	2822.06	2059.45	2330.15	1032.81	653.62	1102.56	1030.08	2404.46	954.768	1.33043	1.21321e-13	3.08078e-12
HMJ22_RS23550	CDS	radC	503.022	388.41	477.728	457.35	497.479	185.627	162.218	205.393	201.117	464.798	188.589	1.3232	5.24308e-22	3.34212e-20
HMJ22_RS23620	CDS	trmH	50.0037	48.5513	67.8512	66.6111	48.6043	39.7771	18.2001	20.6819	30.7658	56.3243	27.3562	1.0552	0.00020357	0.00096982
HMJ22_RS23670	CDS	glnA	32272.5	36235.5	34906	21781.1	23588.8	9358.09	9876.31	7939	8287.96	29756.8	8865.34	1.74653	3.89652e-21	2.30637e-19
HMJ22_RS23675	CDS	glnL	513.471	331.767	605.122	541.129	476.036	221.914	241.349	216.804	226.755	493.505	226.706	1.1564	4.41512e-13	1.03547e-11
HMJ22_RS23740	rRNA	rrf	31.3456	24.2756	91.3914	62.4908	63.6145	20.9353	32.4436	31.3795	25.6381	54.6236	27.5991	1.06574	0.00141102	0.00513211
HMJ22_RS23755	rRNA		1192.63	25546.1	3335.79	35.0223	277.33	156.317	266.671	32.0926	23.9289	6077.37	119.752	5.66508	9.64625e-05	0.000505919
HMJ22_RS23820	CDS	asnC	68.6618	113.286	95.5455	37.0825	53.6077	29.3095	22.9479	29.9531	28.4868	73.6368	27.6743	1.29816	3.36411e-05	0.00020121
HMJ22_RS23875	CDS	atpD	3070.38	3188.2	2776.36	3376.56	3405.16	1279.85	1177.47	1630.31	1591.27	3163.33	1419.72	1.15563	7.82384e-16	2.62839e-14
HMJ22_RS23880	CDS		314.202	161.838	411.261	714.181	613.272	189.814	136.896	300.244	238.15	442.951	216.276	1.0551	0.00266589	0.00885424
HMJ22_RS23970	CDS	mnmE	128.368	97.1026	120.47	159.317	124.37	46.7556	37.9828	65.6116	79.7631	125.926	57.5283	1.16059	2.40049e-06	1.91885e-05
HMJ22_RS23975	CDS	yidC	960.519	906.291	1135.47	1021.83	1021.41	375.44	373.497	442.165	417.617	1009.1	402.18	1.33542	5.61967e-28	5.37327e-26
HMJ22_RS23980	CDS	yidD	11.1949	16.1838	8.30831	5.4937	4.28862	0	1.58262	3.56585	0	9.09385	1.28712	2.68734	0.00105505	0.00400741
HMJ22_RS23985	CDS	rnpA	26.1213	64.7351	55.3887	61.8041	34.3089	9.07198	3.16523	4.27902	15.3829	48.4716	7.97478	2.51058	1.57375e-08	1.86303e-07
HMJ22_RS23990	CDS	rpmH	3514.44	3212.48	4487.87	2040.91	3488.07	969.306	1042.94	1276.57	1370.79	3348.75	1164.9	1.52331	3.25655e-12	6.5553e-11
HMJ22_RS24030	CDS		45.5258	80.9188	55.3887	26.7818	30.0203	19.5396	8.70439	7.84486	15.9526	47.7271	13.0104	1.71972	8.90564e-06	6.11872e-05
HMJ22_RS24090	CDS		322.412	1165.23	483.267	23.3482	82.1985	60.7124	53.0176	72.0301	69.5079	415.291	63.817	2.69126	0.00298661	0.00973094
HMJ22_RS24205	CDS		20.8971	16.1838	13.8472	21.2881	19.2988	10.4677	4.74785	9.2712	10.2553	18.303	8.68549	1.11093	0.00301454	0.00981533
HMJ22_RS24270	CDS		15.6728	64.7351	38.7721	35.0223	29.3055	15.3526	14.2435	7.84486	17.0921	36.7016	13.6333	1.24623	0.00120611	0.00448862
HMJ22_RS24285	CDS		26.8677	8.09188	19.3861	17.1678	16.4397	6.2806	9.49569	6.41852	5.69736	17.5906	6.97305	1.47974	0.000243335	0.00113177
HMJ22_RS24305	CDS		5972.83	7622.55	4660.96	3678.03	3754.68	1508.74	1641.96	1464.14	1473.34	5137.81	1522.04	1.75143	1.89687e-15	6.04566e-14
HMJ22_RS24310	CDS		132.099	97.1026	216.016	24.7216	88.6314	16.0504	30.0697	30.6663	35.3237	111.714	28.0275	1.99473	1.48019e-05	9.69631e-05
HMJ22_RS24315	CDS		384.357	882.015	551.118	79.6586	225.867	27.2159	46.6872	57.0536	68.3684	424.603	49.8313	3.07727	1.33059e-06	1.11941e-05
HMJ22_RS24320	CDS		763.489	1189.51	816.984	288.419	596.117	145.849	177.253	237.485	212.512	730.903	193.275	1.90221	2.83668e-09	3.76106e-08
HMJ22_RS24325	CDS	gmtX	173.893	161.838	171.705	54.937	105.786	50.2448	61.722	57.0536	86.0302	133.632	63.7626	1.03735	0.00151991	0.00548402
HMJ22_RS24385	CDS		222.405	331.767	213.247	203.954	215.146	62.1081	55.3916	68.4643	90.0184	237.303	68.9956	1.71748	2.41958e-17	1.01094e-15
HMJ22_RS24405	CDS		75.3787	153.746	135.702	26.0951	70.7621	21.6332	30.0697	29.9531	23.3592	92.3368	26.2538	1.73516	1.86685e-05	0.000119194
HMJ22_RS24410	CDS		1977.76	3511.88	1370.87	511.601	1375.22	498.261	918.708	765.944	750.913	1749.46	733.456	1.24702	0.0015971	0.00570867
HMJ22_RS24435	CDS		108.963	178.021	204.938	103.007	113.648	50.2448	38.7741	48.4955	63.2408	141.716	50.1888	1.44521	5.32779e-08	5.73371e-07
HMJ22_RS24510	CDS		2559.14	3762.73	3274.86	1132.39	2452.37	643.412	723.255	981.321	1009	2636.3	839.248	1.64726	2.02515e-08	2.35258e-07
HMJ22_RS24550	CDS		94.7831	97.1026	120.47	50.13	69.3326	38.3814	39.5654	42.077	46.7184	86.3638	41.6856	1.01069	0.000196931	0.000946945
HMJ22_RS24610	CDS	vapB	49.2574	56.6432	88.622	56.9971	52.1782	35.5901	14.2435	29.9531	18.8013	60.7396	24.647	1.29718	3.43194e-05	0.000203138
HMJ22_RS24850	CDS		94.0368	137.562	130.163	35.0223	71.4769	40.475	15.0349	38.5111	55.8342	93.6523	37.4638	1.26014	0.00194156	0.00677435
