# Supplementary material for: Hosts manipulate lifestyle switch and pathogenicity heterogeneity of opportunistic pathogens in the single-cell resolution
Source: eLife. 2024 Aug 27;13:RP96789. doi: 10.7554/eLife.96789 (PMC11349298; doi:10.7554/eLife.96789)
Supplement: Supplementary file 3. [file elife-96789-supp3.xlsx]

## Sheet: down metabolites
KEGG	Metabolites	log2(FC)	RED/BLUE	ID Annotation	Annotation	Alignment ID	Average Rt(min)	Average RI	Quant mass	Total score	HMDB	Super Class	Class	Sub Class	VIP	P-value	adj.P-value	FC	average(larvae)	average(control)
C01235	Galactinol	-6.12015	blue	eco00052	Galactose metabolism	492	23.49	819649	175	77.7	HMDB0005826	Organic oxygen compounds	Organooxygen compounds	Carbohydrates and carbohydrate conjugates	2.40869	0.000281031	0.00141876	0.0143764	0.000686735	0.0477681
C00780	Serotonin	-3.75838	blue	eco00380	Tryptophan metabolism	351	18.518	582674	174.092	89.4	HMDB0000259	Organoheterocyclic compounds	Indoles and derivatives	Tryptamines and derivatives	1.87548	0.000303628	0.0014702	0.0738951	0.0322558	0.436508
C00956	Aminoadipic Acid	-3.67429	blue	eco00300|eco00310	Lysine biosynthesis|Lysine degradation	308	16.928	487313	260.1	99.1	HMDB0000510	Organic acids and derivatives	Carboxylic acids and derivatives	Amino acids, peptides, and analogues	1.87015	4.87247e-07	4.48267e-05	0.0783302	0.00300091	0.038311
C00956	Alpha-Aminoadipic Acid	-1.68017	blue	eco00300|eco00310	Lysine biosynthesis|Lysine degradation	309	16.943	487314	147	82.6	HMDB0000510	Organic acids and derivatives	Carboxylic acids and derivatives	Amino acids, peptides, and analogues	1.227	0.000398083	0.00174398	0.312046	0.00224965	0.00720935
C00483	Tyramine	-3.55344	blue	eco00680|eco00350	Methane metabolism|Tyrosine metabolism	489	23.362	819638	174.054	88.1	HMDB0000306	Benzenoids	Benzene and substituted derivatives	Phenethylamines	1.83222	2.47073e-05	0.000343422	0.0851739	0.00548667	0.0644172
C05659	5-Methoxytryptamine	-3.55079	blue	eco00380	Tryptophan metabolism	509	24.114	819702	174.054	80.8	HMDB0004095	Organoheterocyclic compounds	Indoles and derivatives	Tryptamines and derivatives	1.80363	0.00181881	0.00597608	0.0853305	0.00119359	0.0139879
C02273	Digalacturonic Acid	-3.57937	blue	eco02010|eco00040	ABC transporters|Pentose and glucuronate interconversions	448	22.054	747446	143	78.1	HMDB0039721	Organic oxygen compounds	Organooxygen compounds	Carbohydrates and carbohydrate conjugates	1.79355	0.00939626	0.0235761	0.0836572	0.000425502	0.00508626
C01697	Hexitol	-3.02128	blue	eco02060|eco00052	Phosphotransferase system (PTS)|Galactose metabolism	290	15.906	487278	383.133	73.6	HMDB0000107	Organic oxygen compounds	Organooxygen compounds	Carbohydrates and carbohydrate conjugates	1.73628	8.99557e-06	0.000225707	0.12317	3.21443e-05	0.000260976
C00092	Glucose 6-Phosphate	-1.34147	blue	eco02060|eco00521|eco00500|eco02020|eco00562	Phosphotransferase system (PTS)|Streptomycin biosynthesis|Starch and sucrose metabolism|Two-component system|Inositol phosphate metabolism	479	23	747510	387.1	98	HMDB0001401	Organic oxygen compounds	Organooxygen compounds	Carbohydrates and carbohydrate conjugates	1.08258	0.00104641	0.00375441	0.394619	0.034542	0.0875325
C00092	Glucose-6-Phosphate	-3.2202	blue	eco02060|eco00521|eco00500|eco02020|eco00562	Phosphotransferase system (PTS)|Streptomycin biosynthesis|Starch and sucrose metabolism|Two-component system|Inositol phosphate metabolism	477	22.984	747509	333.1	83.3	HMDB0001401	Organic oxygen compounds	Organooxygen compounds	Carbohydrates and carbohydrate conjugates	1.68745	0.00856716	0.0218939	0.107306	0.00114164	0.0106391
C00355	Dl-Dopa	-2.98284	blue	eco00350	Tyrosine metabolism	168	11.894	381047	232.08	77	HMDB0000609	Organic acids and derivatives	Carboxylic acids and derivatives	Amino acids, peptides, and analogues	1.67802	3.04492e-06	9.33775e-05	0.126496	0.000346699	0.00274079
C00130	Inosine-5'-Monophosphate	-2.93679	blue	eco00230	Purine metabolism	570	26.612	886854	315.082	87	HMDB0000175	Nucleosides, nucleotides, and analogues	Purine nucleotides	Purine ribonucleotides	1.65454	0.000168097	0.00110464	0.130598	0.000502596	0.00384842
C01879	Oxoproline	-2.77831	blue	eco00480	Glutathione metabolism	160	11.609	381038	156.1	94.4	HMDB0000267	Organic acids and derivatives	Carboxylic acids and derivatives	Amino acids, peptides, and analogues	1.61994	1.18925e-06	6.56464e-05	0.145762	0.0556793	0.381987
C00327	Citrulline	-2.34436	blue	eco00220	Arginine biosynthesis	347	18.374	582668	157.06	90.6	HMDB0000904	Organic acids and derivatives	Carboxylic acids and derivatives	Amino acids, peptides, and analogues	1.4788	2.16391e-05	0.0003318	0.196914	0.00258948	0.0131503
C00438	N-Carbamoylaspartate	-2.3148	blue	eco00250|eco00240	Alanine, aspartate and glutamate metabolism|Pyrimidine metabolism	211	13.425	381095	160	90.5	HMDB0000828	Organic acids and derivatives	Carboxylic acids and derivatives	Amino acids, peptides, and analogues	1.4759	0.000362145	0.00164152	0.20099	0.0162868	0.0810328
C00148	L-Proline	-2.1162	blue	eco00970|eco00330|eco00332|eco00401	Aminoacyl-tRNA biosynthesis|Arginine and proline metabolism|Carbapenem biosynthesis|Novobiocin biosynthesis	132	10.499	323189	142.067	96.4	HMDB0000162	Organic acids and derivatives	Carboxylic acids and derivatives	Amino acids, peptides, and analogues	1.41021	3.82103e-07	4.48267e-05	0.230654	0.0513318	0.222548
C00026	Alpha-Ketoglutarate	-2.1127	blue	eco00250|eco00300|eco00220|eco00310|eco00340|eco00020|eco00040|eco00430|eco00630|eco00660|eco00650|eco00053|eco00471	Alanine, aspartate and glutamate metabolism|Lysine biosynthesis|Arginine biosynthesis|Lysine degradation|Histidine metabolism|Citrate cycle (TCA cycle)|Pentose and glucuronate interconversions|Taurine and hypotaurine metabolism|Glyoxylate and dicarboxylate metabolism|C5-Branched dibasic acid metabolism|Butanoate metabolism|Ascorbate and aldarate metabolism|D-Glutamine and D-glutamate metabolism	263	14.919	487244	174	85.5	HMDB0000208	Organic acids and derivatives	Keto acids and derivatives	Gamma-keto acids and derivatives	1.39853	5.6792e-05	0.000540503	0.231214	0.00109047	0.00471627
C00184	Dihydroxyacetone	-2.23427	blue	eco00680|eco00561	Methane metabolism|Glycerolipid metabolism	99	9.276	262417	160	83.2	HMDB0001882	Organic oxygen compounds	Organooxygen compounds	Carbohydrates and carbohydrate conjugates	1.34812	0.00342196	0.0097367	0.212529	0.000367291	0.00172819
C01020	6-Hydroxynicotinic Acid	-1.95855	blue	eco00760	Nicotinate and nicotinamide metabolism	261	14.894	487243	268	97.4	HMDB0002658	Organoheterocyclic compounds	Pyridines and derivatives	Pyridinecarboxylic acids and derivatives	1.34308	7.5781e-05	0.000653611	0.257286	0.00224899	0.0087412
C00366	Uric Acid	-2.36686	blue	eco00230	Purine metabolism	427	21.377	668805	441.169	90.9	HMDB0000289	Organoheterocyclic compounds	Imidazopyrimidines	Purines and purine derivatives	1.34175	0.0349393	0.0725057	0.193867	0.00347102	0.0179041
C00049	Aspartate	-1.80863	blue	eco00250|eco00300|eco00460|eco00220|eco00260|eco00970|eco00760|eco02010|eco00270|eco00340|eco00770|eco00410|eco02030|eco00261	Alanine, aspartate and glutamate metabolism|Lysine biosynthesis|Cyanoamino acid metabolism|Arginine biosynthesis|Glycine, serine and threonine metabolism|Aminoacyl-tRNA biosynthesis|Nicotinate and nicotinamide metabolism|ABC transporters|Cysteine and methionine metabolism|Histidine metabolism|Pantothenate and CoA biosynthesis|beta-Alanine metabolism|Bacterial chemotaxis|Monobactam biosynthesis	190	12.58	381069	160.006	91.7	HMDB0000191	Organic acids and derivatives	Carboxylic acids and derivatives	Amino acids, peptides, and analogues	1.28167	0.000197374	0.00118662	0.285463	0.00118861	0.0041638
C00049	L-Aspartic Acid	-1.44704	blue	eco00250|eco00300|eco00460|eco00220|eco00260|eco00970|eco00760|eco02010|eco00270|eco00340|eco00770|eco00410|eco02030|eco00261	Alanine, aspartate and glutamate metabolism|Lysine biosynthesis|Cyanoamino acid metabolism|Arginine biosynthesis|Glycine, serine and threonine metabolism|Aminoacyl-tRNA biosynthesis|Nicotinate and nicotinamide metabolism|ABC transporters|Cysteine and methionine metabolism|Histidine metabolism|Pantothenate and CoA biosynthesis|beta-Alanine metabolism|Bacterial chemotaxis|Monobactam biosynthesis	233	14.088	381116	232.1	86.1	HMDB0000191	Organic acids and derivatives	Carboxylic acids and derivatives	Amino acids, peptides, and analogues	1.14798	8.71767e-05	0.00070767	0.366773	0.00976203	0.026616
C00117	D-Ribose-5-Phosphate	-1.75164	blue	eco00230|eco00030|eco00440|eco00750	Purine metabolism|Pentose phosphate pathway|Phosphonate and phosphinate metabolism|Vitamin B6 metabolism	418	20.841	668778	392.133	76.2					1.24801	0.000281441	0.00141876	0.296963	0.00020422	0.000687693
C00013	Pyrophosphate	-1.90949	blue	eco00190	Oxidative phosphorylation	294	16.103	487285	451.1	96.3	HMDB0000250	Homogeneous non-metal compounds	Non-metal oxoanionic compounds	Non-metal pyrophosphates	1.24414	0.00739782	0.0192622	0.266187	0.00705527	0.0265049
C00212	Adenosine	-1.78675	blue	eco00230|eco02010	Purine metabolism|ABC transporters	527	24.813	886669	230.075	95.6	HMDB0000050	Nucleosides, nucleotides, and analogues	Purine nucleosides		1.22485	0.00316561	0.00934009	0.289825	0.00545373	0.0188173
C00153	Niacinamide	-1.59972	blue	eco00760	Nicotinate and nicotinamide metabolism	131	10.484	323188	180	95.6	HMDB0001406	Organoheterocyclic compounds	Pyridines and derivatives	Pyridinecarboxylic acids and derivatives	1.20387	9.50955e-05	0.000740851	0.329941	0.00396566	0.0120193
C00170	5'-Deoxy-5'-Methylthioadenosine	-1.59013	blue	eco00270	Cysteine and methionine metabolism	552	25.576	886748	236.057	78.3	HMDB0001173	Nucleosides, nucleotides, and analogues	5'-deoxyribonucleosides	5'-deoxy-5'-thionucleosides	1.1849	0.000564325	0.00225936	0.332142	0.00129598	0.00390187
C01401	L-Alanine	-1.43107	blue	eco00460	Cyanoamino acid metabolism	47	7.178	262294	116	95.6	HMDB0000161	Organic acids and derivatives	Carboxylic acids and derivatives	Amino acids, peptides, and analogues	1.15482	1.57908e-06	7.26375e-05	0.370855	0.18823	0.507558
C00431	5-Aminovaleric Acid	-1.42895	blue	eco00310|eco00330	Lysine degradation|Arginine and proline metabolism	187	12.529	381067	218	91.1	HMDB0003355	Organic acids and derivatives	Carboxylic acids and derivatives	Amino acids, peptides, and analogues	1.1332	0.000131218	0.000953057	0.371401	0.000442782	0.00119219
C00037	Glycine	-1.41389	blue	eco00230|eco00460|eco00260|eco00310|eco00970|eco00480|eco00680|eco00440|eco01502|eco00630|eco00730|eco02026|eco00860	Purine metabolism|Cyanoamino acid metabolism|Glycine, serine and threonine metabolism|Lysine degradation|Aminoacyl-tRNA biosynthesis|Glutathione metabolism|Methane metabolism|Phosphonate and phosphinate metabolism|Vancomycin resistance|Glyoxylate and dicarboxylate metabolism|Thiamine metabolism|Biofilm formation - Escherichia coli|Porphyrin and chlorophyll metabolism	135	10.635	323197	174.1	98.6	HMDB0000123	Organic acids and derivatives	Carboxylic acids and derivatives	Amino acids, peptides, and analogues	1.13295	3.81516e-05	0.000424127	0.375299	0.153462	0.408905
C00644	Mannitol 1-Phosphate	-1.38865	blue	eco02060|eco00051	Phosphotransferase system (PTS)|Fructose and mannose metabolism	486	23.211	819625	387.1	97.1	HMDB0001530	Organic oxygen compounds	Organooxygen compounds	Carbohydrates and carbohydrate conjugates	1.12419	4.14907e-05	0.000424127	0.381921	0.19682	0.515342
C00135	L-Histidine	-1.38123	blue	eco00970|eco02010|eco00340|eco00410	Aminoacyl-tRNA biosynthesis|ABC transporters|Histidine metabolism|beta-Alanine metabolism	179	12.227	381058	154.058	72	HMDB0000177	Organic acids and derivatives	Carboxylic acids and derivatives	Amino acids, peptides, and analogues	1.11906	9.66328e-05	0.000740851	0.383892	0.000196581	0.000512074
C00221	Glucose	-1.59596	blue	eco00030|eco00010	Pentose phosphate pathway|Glycolysis / Gluconeogenesis	372	19.257	582703	319.1	97	HMDB0000122	Organic oxygen compounds	Organooxygen compounds	Carbohydrates and carbohydrate conjugates	1.09114	0.0329566	0.0699693	0.330801	0.0185751	0.0561517
C00020	5'-Adenosine Monophosphate	-1.33822	blue	eco00230	Purine metabolism	578	27.092	886903	315.075	93.5	HMDB0000045	Nucleosides, nucleotides, and analogues	Purine nucleotides	Purine ribonucleotides	1.08469	0.000381055	0.00169631	0.395507	0.027175	0.0687091
C00020	Adenosine-5'-Monophosphate	-1.2876	blue	eco00230	Purine metabolism	577	27.092	886903	315.067	91	HMDB0000045	Nucleosides, nucleotides, and analogues	Purine nucleotides	Purine ribonucleotides	1.07072	8.29308e-05	0.000693603	0.409633	0.0257981	0.0629785
C00302	L-Glutamic Acid	-1.17989	blue	eco00460	Cyanoamino acid metabolism	279	15.567	487266	246.1	98.3	HMDB0000148	Organic acids and derivatives	Carboxylic acids and derivatives	Amino acids, peptides, and analogues	1.03928	1.67678e-05	0.000312005	0.441386	0.345749	0.783327
C00022	Pyruvic Acid	-1.17043	blue	eco00250|eco00260|eco02060|eco00760|eco00270|eco00030|eco00330|eco00680|eco00440|eco00020|eco00040|eco00430|eco01502|eco00630|eco00770|eco00010|eco00730|eco00660|eco00350|eco00473|eco00261|eco00650|eco00053|eco00290|eco00620|eco00621|eco00622|eco00900|eco00360|eco00362	Alanine, aspartate and glutamate metabolism|Glycine, serine and threonine metabolism|Phosphotransferase system (PTS)|Nicotinate and nicotinamide metabolism|Cysteine and methionine metabolism|Pentose phosphate pathway|Arginine and proline metabolism|Methane metabolism|Phosphonate and phosphinate metabolism|Citrate cycle (TCA cycle)|Pentose and glucuronate interconversions|Taurine and hypotaurine m…	28	6.305	262242	174	96.2	HMDB0000243	Organic acids and derivatives	Keto acids and derivatives	Alpha-keto acids and derivatives	1.03142	2.48857e-05	0.000343422	0.444288	0.00455166	0.0102448
C00134	Putrescine	-1.19037	blue	eco02010|eco00480|eco00330	ABC transporters|Glutathione metabolism|Arginine and proline metabolism	315	17.208	582623	174.1	94.1	HMDB0001414	Organic nitrogen compounds	Organonitrogen compounds	Amines	1.00746	0.00282209	0.00846627	0.438189	0.656777	1.49884
C00263	Homoserine	-1.16956	blue	eco00300|eco00260|eco00270|eco00920	Lysine biosynthesis|Glycine, serine and threonine metabolism|Cysteine and methionine metabolism|Sulfur metabolism	198	12.974	381081	218.08	83.9	HMDB0000719	Organic acids and derivatives	Carboxylic acids and derivatives	Amino acids, peptides, and analogues	1.00235	0.00119525	0.00422934	0.444557	0.00101348	0.00227975
C02528	Chenodeoxycholic Acid	-6.03682	blue			488	23.322	819635	241	74.8	HMDB0000518	Lipids and lipid-like molecules	Steroids and steroid derivatives	Bile acids, alcohols and derivatives	2.4173	1.92177e-05	0.000312005	0.0152313	0.000525955	0.0345312
C01420	L-Cystine	-3.15991	blue			468	22.654	747487	146	86.8	HMDB0000192	Organic acids and derivatives	Carboxylic acids and derivatives	Amino acids, peptides, and analogues	1.60442	0.0394587	0.0783497	0.111885	0.000566385	0.00506218
C03647	Trans-Trans-Muconic Acid	-3.50816	blue			408	20.573	668764	271.2	82.6	HMDB0002349	Lipids and lipid-like molecules	Fatty Acyls	Fatty acids and conjugates	1.90483	2.96529e-05	0.000389724	0.0878898	0.00454484	0.0517106
C00515	Ornithine	-2.58299	blue			343	18.261	582664	142.053	95.6	HMDB0000214	Organic acids and derivatives	Carboxylic acids and derivatives	Amino acids, peptides, and analogues	1.55873	8.06156e-06	0.000222499	0.166894	0.00615041	0.0368521
C00597	3-Phosphoglyceric Acid	-1.42658	blue			341	18.112	582658	357.1	98	HMDB0000807	Organic oxygen compounds	Organooxygen compounds	Carbohydrates and carbohydrate conjugates	1.12793	0.000282723	0.00141876	0.37201	0.230171	0.618721
C16440	Lysine	-2.12045	blue			384	19.631	582717	362.117	76.8	HMDB0000182	Organic acids and derivatives	Carboxylic acids and derivatives	Amino acids, peptides, and analogues	1.38997	0.000274285	0.00141876	0.229975	0.00156822	0.00681911
C16440	L-Lysine	-2.31699	blue			383	19.605	582716	174.078	95.5	HMDB0000182	Organic acids and derivatives	Carboxylic acids and derivatives	Amino acids, peptides, and analogues	1.46927	3.8872e-05	0.000424127	0.200685	0.0663357	0.330546
C03736	D-Ribose 5-Phosphate	-1.399	blue			475	22.915	747504	315.077	91.9	HMDB0001548	Organic oxygen compounds	Organooxygen compounds	Carbohydrates and carbohydrate conjugates	1.11376	0.000362755	0.00164152	0.379192	0.0128445	0.0338732
C01507	Sorbitol	-3.09002	blue			385	19.636	582717	319.1	90.1	HMDB0000247	Organic oxygen compounds	Organooxygen compounds	Carbohydrates and carbohydrate conjugates	1.64771	0.00324222	0.00934009	0.117439	0.00369117	0.0314307
C08250	Sophorose	-1.46756	blue			469	22.715	747491	290.089	82.7					1.15748	6.35687e-05	0.000565967	0.361594	0.0045996	0.0127204
C03665	2-Aminoisobutyric Acid	-2.07273	blue			75	8.353	262363	130.017	95.9	HMDB0001906	Organic acids and derivatives	Carboxylic acids and derivatives	Amino acids, peptides, and analogues	1.38462	1.27037e-05	0.000269709	0.237708	0.0093151	0.0391871
C00736	L-Cysteine	-2.68908	blue			251	14.598	487233	220.047	99.2	HMDB0000574	Organic acids and derivatives	Carboxylic acids and derivatives	Amino acids, peptides, and analogues	1.59594	3.7526e-05	0.000424127	0.155062	0.0102675	0.0662153
C16438	L-Asparagine	-1.96406	blue			356	18.676	582680	188.069	79.5	HMDB0000168	Organic acids and derivatives	Carboxylic acids and derivatives	Amino acids, peptides, and analogues	1.33706	0.000219768	0.00126366	0.256306	0.00197019	0.00768689
C01517	Naproxen	-2.0226	blue			259	14.843	487241	185.036	76.7	HMDB0001923	Benzenoids	Naphthalenes		1.33831	0.000109558	0.000817246	0.246114	0.000180402	0.000732999
C01551	Allantoin	-1.75932	blue			189	12.563	381068	188.046	83.3	HMDB0000462	Organoheterocyclic compounds	Azoles	Imidazoles	1.23609	0.0022447	0.00712113	0.295387	0.000206771	0.000700001
C04617	Isocitric Acid	-1.40758	blue			134	10.607	323195	244.976	83.6	HMDB0000193	Organic acids and derivatives	Carboxylic acids and derivatives	Tricarboxylic acids and derivatives	1.08908	0.00260372	0.00796605	0.376942	0.00016857	0.000447203
C00872	Aminomalonate	-1.61913	blue			206	13.281	381091	147	92.3	HMDB0001147	Organic acids and derivatives	Carboxylic acids and derivatives	Amino acids, peptides, and analogues	1.2032	0.000235854	0.00132848	0.325531	0.00802368	0.024648
	D-Fructose-1,6-Bisphosphate	-1.47555				331	17.742	582644	299	84.1					1.14721	0.0003628	0.00164152	0.359596	0.0169361	0.0470975
	Pyrazine, 3,6-Dihydro-3,6-Dimethyl-2,5-Dihydroxy-	-1.95916				153	11.334	381030	271.06	89.2					1.35528	2.96894e-06	9.33775e-05	0.257178	0.000166407	0.000647052
	Xylofuranose	-5.41601				473	22.812	747497	217.1	87.2					2.24716	0.00232733	0.00729934	0.0234218	0.0088628	0.3784
	Lactobionic Acid	-5.26372				439	21.722	747424	217.1	82.7					2.19785	0.0123193	0.0299365	0.0260292	0.00174769	0.0671433
	2-Oxo-Propanoic Acid	-2.32453				41	6.933	262279	217	94.8					1.57107	0.00018992	0.00118662	0.199639	0.000665671	0.00333437
	6-Deoxyglucitol	-1.50123				195	12.801	381076	320.113	81.5					1.16594	0.000211262	0.0012406	0.353252	0.000140289	0.000397137
	1,1-Di-C-Octyl-D-Glucitol	-2.85829				480	23.024	747512	217.083	80.6					1.59603	0.00454864	0.0124299	0.137902	0.00784482	0.056887
	3-Hydroxymyristate	-1.42612				414	20.728	668772	233.014	92.8	HMDB0061656	Lipids and lipid-like molecules	Fatty Acyls	Fatty acids and conjugates	1.10155	0.00205323	0.00658945	0.372129	0.004098	0.0110123
	2-Monoolein	-2.79928				539	25.215	886711	103	82.9	HMDB0011537	Lipids and lipid-like molecules	Glycerolipids	Monoradylglycerols	1.63345	2.82967e-07	4.48267e-05	0.143659	0.0115233	0.0802126
	2-Aminoethyl Methacrylate	-3.34001				464	22.505	747477	174.05	85.7					1.77623	1.83752e-05	0.000312005	0.0987542	0.0026014	0.0263422
	2-Oxopropanoic Phosphoric Anhydride	-1.92026				272	15.23	487255	369.033	95.4					1.33346	1.02747e-05	0.000236319	0.264208	0.00440499	0.0166724
	6(5h)-Benzo[C]Phenanthridinone, 11,12-Dihydro-	-1.46319				229	13.995	381113	232.108	75.8					1.15301	6.10141e-05	0.00056133	0.362691	0.000727377	0.0020055
	L-Alanine-Alanine	-2.54019				273	15.255	487256	116	90.5					1.5443	2.96829e-06	9.33775e-05	0.17192	0.0149318	0.0868535

## Sheet: up metabolites
KEGG	Metabolites	log2(FC)	RED/BLUE	ID Annotation	Annotation	Alignment ID	Average Rt(min)	Average RI	Quant mass	Total score	HMDB	Super Class	Class	Sub Class	VIP	P-value	adj.P-value	FC	average(larvae)	average(control)
C01595	Linoleic Acid	5.99396	red	eco01040	Biosynthesis of unsaturated fatty acids	458	22.313	747464	337.2	94.6	HMDB0000673	Lipids and lipid-like molecules	Fatty Acyls	Lineolic acids and derivatives	2.38136	3.12645e-05	0.000392227	63.7328	0.509203	0.00798966
C00712	Oleic Acid	4.7351	red	eco00061|eco01040	Fatty acid biosynthesis|Biosynthesis of unsaturated fatty acids	460	22.353	747466	117	99.4	HMDB0000207	Lipids and lipid-like molecules	Fatty Acyls	Fatty acids and conjugates	2.11619	1.85717e-05	0.000312005	26.6322	0.382323	0.0143557
C08362	Palmitelaidic Acid	4.47032	red	eco00061	Fatty acid biosynthesis	415	20.735	668772	117	98.8	HMDB0012328	Lipids and lipid-like molecules	Fatty Acyls	Fatty acids and conjugates	2.04768	0.000162226	0.00109206	22.1667	0.105774	0.00477174
C00345	6-Phosphogluconic Acid	4.09494	red	eco00030	Pentose phosphate pathway	497	23.654	819663	173.086	83.8	HMDB0001316	Organic oxygen compounds	Organooxygen compounds	Carbohydrates and carbohydrate conjugates	1.95045	0.000564839	0.00225936	17.0884	0.00328383	0.000192167
C16526	11-Eicosenoic Acid	3.37198	red	eco01040	Biosynthesis of unsaturated fatty acids	498	23.683	819665	367.28	84.5	HMDB0034296	Lipids and lipid-like molecules	Fatty Acyls	Fatty acids and conjugates	1.75737	0.00104742	0.00375441	10.3531	0.00250654	0.000242107
C02483	Gamma-Tocopherol	2.36702	red	eco00130	Ubiquinone and other terpenoid-quinone biosynthesis	571	26.75	886868	488.414	79.4	HMDB0001492	Lipids and lipid-like molecules	Prenol lipids	Quinone and hydroquinone lipids	1.33844	0.0280926	0.0610517	5.15876	0.0014432	0.000279758
C00257	Gluconic Acid	1.88867	red	eco00030	Pentose phosphate pathway	404	20.409	668756	333.1	97.8	HMDB0000625	Organic oxygen compounds	Organooxygen compounds	Carbohydrates and carbohydrate conjugates	1.29294	0.0288457	0.0621986	3.70294	0.0179225	0.00484008
C00249	Palmitic Acid	1.62029	red	eco00061|eco01040|eco00071	Fatty acid biosynthesis|Biosynthesis of unsaturated fatty acids|Fatty acid degradation	420	20.937	668783	313.2	99.2	HMDB0000220	Lipids and lipid-like molecules	Fatty Acyls	Fatty acids and conjugates	1.21373	0.000300332	0.0014702	3.07436	0.815965	0.265409
C06153	Scyllo-Inositol	1.68282	red	eco00562	Inositol phosphate metabolism	425	21.274	668800	305.1	91.6	HMDB0006088	Organic oxygen compounds	Organooxygen compounds	Alcohols and polyols	1.20319	0.00262649	0.00796605	3.21056	0.00363834	0.00113324
C00256	L-Lactic Acid	1.52685	red	eco01502|eco00620	Vancomycin resistance|Pyruvate metabolism	32	6.464	262252	147	99.7	HMDB0000190	Organic acids and derivatives	Hydroxy acids and derivatives	Alpha hydroxy acids and derivatives	1.16413	0.000817857	0.00309217	2.88155	0.143582	0.049828
C06424	Myristic Acid	1.18278	red	eco00061	Fatty acid biosynthesis	358	18.728	582682	117	99	HMDB0000806	Lipids and lipid-like molecules	Fatty Acyls	Fatty acids and conjugates	1.00012	0.00324873	0.00934009	2.27014	0.130457	0.0574666
C01694	Ergosterol	7.58592	red			588	28.627	887061	363.289	87.9	HMDB0000878	Lipids and lipid-like molecules	Steroids and steroid derivatives	Ergostane steroids	2.66504	0.00148543	0.00506145	192.127	0.0604186	0.000314473
C01789	Campesterol	3.27135	red			590	28.811	887079	343.233	82.2	HMDB0002869	Lipids and lipid-like molecules	Steroids and steroid derivatives	Ergostane steroids	1.76208	0.000151452	0.00106454	9.65548	0.00402384	0.000416742
C01724	Lanosterol	5.81442	red			595	29.67	887167	486.4	71.4	HMDB0001251	Lipids and lipid-like molecules	Prenol lipids	Triterpenoids	2.37327	5.05973e-05	0.000498745	56.2751	0.00258116	4.58669e-05
C00187	Cholesterol	4.92552	red			496	23.645	819662	225.1	78.8	HMDB0000067	Lipids and lipid-like molecules	Steroids and steroid derivatives	Cholestane steroids	2.14625	0.000782037	0.00299781	30.3899	0.00440911	0.000145085
C07182	Tromethamine	4.74082	red			181	12.32	381061	234.1	98	HMDB0240288	Organic nitrogen compounds	Organonitrogen compounds	Amines	2.12351	9.89487e-07	6.56464e-05	26.738	0.00905533	0.000338669
C01753	Beta-Sitosterol	3.31285	red			594	29.667	887167	357.288	85.4	HMDB0000852	Lipids and lipid-like molecules	Steroids and steroid derivatives	Stigmastanes and derivatives	1.76531	0.000563311	0.00225936	9.93724	0.00611378	0.000615239
	(3beta,5alpha)-Cholesta-8,24-Dien-3-Ol	10.7685				586	28.446	887042	456.371	88.7					3.24843	0.000614474	0.00242278	1744.43	0.00666868	3.82283e-06
	Alloxanoic Acid	2.55633				278	15.517	487265	331.1	87.1					1.31566	0.0418416	0.0819028	5.8821	0.00122031	0.000207462
	Montanic Acid	1.57176				419	20.935	668783	117	90.7	HMDB0002348	Lipids and lipid-like molecules	Fatty Acyls	Fatty acids and conjugates	1.20091	0.000154281	0.00106454	2.97267	0.758594	0.25519
	(E)-9-Tetradecenoic Acid	3.24166				346	18.36	582668	117	88.7					1.73132	0.000482255	0.0020167	9.45883	0.0279449	0.00295438
	2-Hydroxy-3-Methylbutyric Acid	1.84962				69	8.197	262354	145.062	91.2	HMDB0000407	Lipids and lipid-like molecules	Fatty Acyls	Fatty acids and conjugates	1.27037	0.00179598	0.00597216	3.60406	0.00454385	0.00126076

## Sheet: explanation
explanation
The green background is the differential metabolites enriched to the pathway
The blue background is the differential metabolites with KEGG ID, but not enriched to the pathway
No background color is differential metabolites without KEGG ID
