# Supplementary material for: Hosts manipulate lifestyle switch and pathogenicity heterogeneity of opportunistic pathogens in the single-cell resolution
Source: eLife. 2024 Aug 27;13:RP96789. doi: 10.7554/eLife.96789 (PMC11349298; doi:10.7554/eLife.96789)
Supplement: Supplementary file 4. [file elife-96789-supp4.xlsx]

## Sheet: Sheet1
	p_val	avg_log2FC	pct.1	pct.2	p_val_adj	cluster	gene
HMJ22-RS09625	7.9e-58	-0.883832	0.226	0.62	3.74e-54	0	HMJ22-RS09625
HMJ22-RS05560	6.65e-53	-0.676459	0.404	0.81	3.15e-49	0	HMJ22-RS05560
HMJ22-RS01180	1.17e-50	-0.781365	0.249	0.629	5.53e-47	0	HMJ22-RS01180
HMJ22-RS07440	2.11e-50	-0.529967	0.642	0.935	1e-46	0	HMJ22-RS07440
HMJ22-RS22860	3e-49	-1.66726	0.031	0.261	1.42e-45	0	HMJ22-RS22860
HMJ22-RS00810	4.94e-46	-0.560056	0.786	0.971	2.34e-42	0	HMJ22-RS00810
HMJ22-RS22995	9.31e-46	-0.719355	0.154	0.473	4.41e-42	0	HMJ22-RS22995
HMJ22-RS07650	1.1e-42	-0.416696	0.215	0.555	5.23e-39	0	HMJ22-RS07650
HMJ22-RS15525	1.24e-41	-0.704456	0.169	0.478	5.86e-38	0	HMJ22-RS15525
HMJ22-RS15390	1.05e-39	-0.565932	0.134	0.417	4.98e-36	0	HMJ22-RS15390
HMJ22-RS18445	6.82e-39	-0.299411	0.964	0.994	3.23e-35	0	HMJ22-RS18445
HMJ22-RS19665	4.57e-38	-0.465777	0.228	0.571	2.16e-34	0	HMJ22-RS19665
HMJ22-RS08215	5.54e-36	-0.530685	0.216	0.536	2.62e-32	0	HMJ22-RS08215
HMJ22-RS17005	1.69e-35	-0.479258	0.172	0.467	7.98e-32	0	HMJ22-RS17005
HMJ22-RS21835	2.24e-35	-0.598244	0.132	0.394	1.06e-31	0	HMJ22-RS21835
HMJ22-RS19625	9.15e-35	-0.638806	0.114	0.358	4.33e-31	0	HMJ22-RS19625
HMJ22-RS21850	2.82e-34	-0.469014	0.181	0.478	1.33e-30	0	HMJ22-RS21850
HMJ22-RS23890	2.22e-33	-0.684982	0.092	0.312	1.05e-29	0	HMJ22-RS23890
HMJ22-RS01175	6.49e-33	-0.479818	0.346	0.709	3.07e-29	0	HMJ22-RS01175
HMJ22-RS03010	2.3e-32	-0.450659	0.185	0.472	1.09e-28	0	HMJ22-RS03010
HMJ22-RS01585	1.53e-31	-0.311048	0.202	0.502	7.25e-28	0	HMJ22-RS01585
HMJ22-RS21920	3.1e-31	-0.515119	0.096	0.313	1.47e-27	0	HMJ22-RS21920
HMJ22-RS09070	7.29e-31	-0.337139	0.144	0.399	3.45e-27	0	HMJ22-RS09070
HMJ22-RS15520	9.94e-31	-0.583068	0.081	0.283	4.71e-27	0	HMJ22-RS15520
HMJ22-RS17560	1e-29	-0.495071	0.078	0.275	4.74e-26	0	HMJ22-RS17560
HMJ22-RS21825	1.8e-29	-0.323095	0.159	0.416	8.53e-26	0	HMJ22-RS21825
HMJ22-RS15105	2.33e-29	-0.397091	0.109	0.33	1.1e-25	0	HMJ22-RS15105
HMJ22-RS05645	3.67e-29	-0.52577	0.099	0.308	1.74e-25	0	HMJ22-RS05645
HMJ22-RS16255	7.6e-29	-0.527121	0.086	0.285	3.6e-25	0	HMJ22-RS16255
HMJ22-RS07800	1.6e-28	-0.320107	0.241	0.545	7.59e-25	0	HMJ22-RS07800
HMJ22-RS13120	1.84e-28	-0.319247	0.182	0.452	8.72e-25	0	HMJ22-RS13120
HMJ22-RS12175	2.45e-28	-0.325759	0.146	0.388	1.16e-24	0	HMJ22-RS12175
HMJ22-RS04730	4.73e-28	-0.340345	0.276	0.603	2.24e-24	0	HMJ22-RS04730
HMJ22-RS05410	5.46e-28	-0.304218	0.156	0.405	2.58e-24	0	HMJ22-RS05410
HMJ22-RS03225	6.73e-28	-0.397291	0.103	0.312	3.19e-24	0	HMJ22-RS03225
HMJ22-RS10165	1.39e-27	-0.443011	0.082	0.272	6.6e-24	0	HMJ22-RS10165
HMJ22-RS21840	4.86e-27	-0.405813	0.073	0.253	2.3e-23	0	HMJ22-RS21840
HMJ22-RS01665	6.27e-27	-0.325359	0.092	0.288	2.97e-23	0	HMJ22-RS01665
HMJ22-RS05715	1.32e-26	-0.411211	0.115	0.324	6.25e-23	0	HMJ22-RS05715
HMJ22-RS13825	2.77e-26	-0.263284	0.144	0.378	1.31e-22	0	HMJ22-RS13825
HMJ22-RS12895	3.71e-26	0.353218	0.964	0.977	1.76e-22	0	HMJ22-RS12895
HMJ22-RS19815	4.83e-26	-0.320285	0.141	0.367	2.29e-22	0	HMJ22-RS19815
HMJ22-RS21830	5.95e-26	-0.30174	0.133	0.354	2.82e-22	0	HMJ22-RS21830
HMJ22-RS05430	8.12e-26	-0.340213	0.178	0.431	3.84e-22	0	HMJ22-RS05430
HMJ22-RS03420	1.54e-25	-0.270533	0.153	0.387	7.29e-22	0	HMJ22-RS03420
HMJ22-RS10150	2.49e-25	-0.276989	0.098	0.29	1.18e-21	0	HMJ22-RS10150
HMJ22-RS21960	4.98e-25	-0.263728	0.155	0.387	2.36e-21	0	HMJ22-RS21960
HMJ22-RS07910	5.17e-25	-0.258833	0.188	0.444	2.45e-21	0	HMJ22-RS07910
HMJ22-RS13985	1.18e-24	-0.326625	0.1	0.287	5.59e-21	0	HMJ22-RS13985
HMJ22-RS01580	1.91e-24	-0.260182	0.183	0.435	9.03e-21	0	HMJ22-RS01580
HMJ22-RS18890	3.61e-24	-0.433081	0.109	0.302	1.71e-20	0	HMJ22-RS18890
HMJ22-RS02735	7.02e-24	-0.394465	0.11	0.301	3.32e-20	0	HMJ22-RS02735
HMJ22-RS17010	7.43e-24	-0.275383	0.167	0.401	3.52e-20	0	HMJ22-RS17010
HMJ22-RS00555	2.1e-23	-0.269516	0.129	0.334	9.93e-20	0	HMJ22-RS00555
HMJ22-RS08120	2.63e-23	-0.265876	0.927	0.991	1.25e-19	0	HMJ22-RS08120
HMJ22-RS12185	4.98e-23	-0.268549	0.122	0.319	2.36e-19	0	HMJ22-RS12185
HMJ22-RS19630	5.97e-23	-0.348666	0.092	0.266	2.82e-19	0	HMJ22-RS19630
HMJ22-RS21350	6.97e-23	-0.263534	0.115	0.305	3.3e-19	0	HMJ22-RS21350
HMJ22-RS19000	1.79e-22	-0.305144	0.085	0.253	8.48e-19	0	HMJ22-RS19000
HMJ22-RS02880	2.85e-22	-0.333888	0.085	0.252	1.35e-18	0	HMJ22-RS02880
HMJ22-RS07940	1.19e-20	-0.302276	0.093	0.256	5.63e-17	0	HMJ22-RS07940
HMJ22-RS23670	2.32e-20	0.354029	0.932	0.966	1.1e-16	0	HMJ22-RS23670
HMJ22-RS06850	1.98e-12	0.405826	0.722	0.824	9.39e-09	0	HMJ22-RS06850
HMJ22-RS08855	3.5e-10	0.258977	0.136	0.269	1.65e-06	0	HMJ22-RS08855
HMJ22-RS16390	2.26e-09	0.301044	0.15	0.284	1.07e-05	0	HMJ22-RS16390
HMJ22-RS06500	3.99e-09	0.770352	0.484	0.535	1.89e-05	0	HMJ22-RS06500
HMJ22-RS07070	8.87e-09	0.279802	0.19	0.343	4.2e-05	0	HMJ22-RS07070
HMJ22-RS10445	1.23e-08	0.375179	0.148	0.277	5.82e-05	0	HMJ22-RS10445
HMJ22-RS00670	1.26e-08	0.318664	0.147	0.273	5.98e-05	0	HMJ22-RS00670
HMJ22-RS20815	3.92e-08	0.252414	0.147	0.267	0.000185342	0	HMJ22-RS20815
HMJ22-RS00310	7.22e-08	0.331651	0.139	0.253	0.000341739	0	HMJ22-RS00310
HMJ22-RS08570	9.21e-08	0.296081	0.18	0.319	0.000436094	0	HMJ22-RS08570
HMJ22-RS12720	1.17e-07	0.330656	0.219	0.385	0.000551759	0	HMJ22-RS12720
HMJ22-RS19660	1.68e-07	0.279183	0.157	0.279	0.00079653	0	HMJ22-RS19660
HMJ22-RS16935	8.48e-07	0.276723	0.258	0.442	0.0040148	0	HMJ22-RS16935
HMJ22-RS05115	9.47e-07	0.357811	0.155	0.27	0.0044827	0	HMJ22-RS05115
HMJ22-RS02130	1.45e-06	0.383879	0.176	0.302	0.00688329	0	HMJ22-RS02130
HMJ22-RS23125	5.18e-06	0.277771	0.261	0.435	0.0245282	0	HMJ22-RS23125
HMJ22-RS06490	9.92e-06	0.383198	0.635	0.756	0.0469423	0	HMJ22-RS06490
HMJ22-RS20810	1.73e-05	0.430325	0.154	0.256	0.0819052	0	HMJ22-RS20810
HMJ22-RS18365	8.16e-05	0.254284	0.331	0.534	0.386352	0	HMJ22-RS18365
HMJ22-RS24305	0.000502363	0.506973	0.246	0.386	1	0	HMJ22-RS24305
HMJ22-RS12570	0.00149737	0.390254	0.279	0.433	1	0	HMJ22-RS12570
HMJ22-RS04790	0.00363169	0.315128	0.613	0.783	1	0	HMJ22-RS04790
HMJ22-RS05350	0.00651388	0.623198	0.177	0.26	1	0	HMJ22-RS05350
HMJ22-RS00810.1	3.86e-29	-0.532005	0.924	0.924	1.83e-25	1	HMJ22-RS00810
HMJ22-RS23670.1	9.57e-29	0.323748	0.997	0.949	4.53e-25	1	HMJ22-RS23670
HMJ22-RS07440.1	1.03e-28	-0.602047	0.851	0.862	4.87e-25	1	HMJ22-RS07440
HMJ22-RS12895.1	3.97e-27	0.289624	0.999	0.968	1.88e-23	1	HMJ22-RS12895
HMJ22-RS06500.1	6.29e-25	0.5674	0.699	0.484	2.98e-21	1	HMJ22-RS06500
HMJ22-RS09625.1	6.32e-18	-0.839897	0.384	0.549	2.99e-14	1	HMJ22-RS09625
HMJ22-RS06485	5.74e-16	0.44652	0.637	0.486	2.72e-12	1	HMJ22-RS06485
HMJ22-RS05560.1	7.58e-15	-0.535431	0.652	0.717	3.59e-11	1	HMJ22-RS05560
HMJ22-RS07650.1	4.54e-14	-0.62377	0.33	0.498	2.15e-10	1	HMJ22-RS07650
HMJ22-RS06495	1.82e-13	0.583108	0.379	0.259	8.63e-10	1	HMJ22-RS06495
HMJ22-RS22995.1	2.28e-13	-0.697918	0.257	0.421	1.08e-09	1	HMJ22-RS22995
HMJ22-RS06850.1	9.45e-13	0.334411	0.899	0.776	4.47e-09	1	HMJ22-RS06850
HMJ22-RS15525.1	4.34e-12	-0.699208	0.275	0.426	2.05e-08	1	HMJ22-RS15525
HMJ22-RS01180.1	8.32e-12	-0.635562	0.428	0.554	3.94e-08	1	HMJ22-RS01180
HMJ22-RS04790.1	1.03e-10	0.294958	0.833	0.719	4.85e-07	1	HMJ22-RS04790
HMJ22-RS19625.1	1.1e-09	-0.635154	0.188	0.319	5.22e-06	1	HMJ22-RS19625
HMJ22-RS04785	2.3e-09	0.294719	0.719	0.6	1.09e-05	1	HMJ22-RS04785
HMJ22-RS06490.1	3.27e-09	0.266089	0.834	0.702	1.55e-05	1	HMJ22-RS06490
HMJ22-RS21350.1	1.51e-07	-0.537529	0.167	0.276	0.00071517	1	HMJ22-RS21350
HMJ22-RS23890.1	2.05e-07	-0.68216	0.173	0.273	0.000968439	1	HMJ22-RS23890
HMJ22-RS12715	4.52e-07	0.408602	0.349	0.27	0.00213924	1	HMJ22-RS12715
HMJ22-RS16255.1	6.94e-07	-0.433913	0.151	0.253	0.00328444	1	HMJ22-RS16255
HMJ22-RS24305.1	1.57e-06	0.333678	0.413	0.336	0.00744398	1	HMJ22-RS24305
HMJ22-RS02140	1.65e-06	0.308144	0.515	0.437	0.00779226	1	HMJ22-RS02140
HMJ22-RS23815	1.76e-06	0.27053	0.513	0.433	0.00832177	1	HMJ22-RS23815
HMJ22-RS07060	1.79e-06	0.264138	0.804	0.741	0.00846806	1	HMJ22-RS07060
HMJ22-RS06510	2e-06	0.544489	0.273	0.203	0.00944707	1	HMJ22-RS06510
HMJ22-RS10150.1	3.27e-06	-0.414578	0.161	0.259	0.0154988	1	HMJ22-RS10150
HMJ22-RS01175.1	9.13e-06	-0.347582	0.57	0.626	0.0432357	1	HMJ22-RS01175
HMJ22-RS19815.1	9.76e-06	-0.40789	0.225	0.327	0.0461963	1	HMJ22-RS19815
HMJ22-RS16930	1.97e-05	-0.306967	0.643	0.685	0.0932621	1	HMJ22-RS16930
HMJ22-RS07800.1	2.01e-05	-0.446058	0.39	0.484	0.0951534	1	HMJ22-RS07800
HMJ22-RS12570.1	2.27e-05	0.35328	0.437	0.384	0.107256	1	HMJ22-RS12570
HMJ22-RS08215.1	0.000106778	-0.323183	0.375	0.471	0.505487	1	HMJ22-RS08215
HMJ22-RS16095	0.000128268	-0.357044	0.349	0.442	0.607221	1	HMJ22-RS16095
HMJ22-RS21850.1	0.00012848	-0.353628	0.325	0.418	0.608224	1	HMJ22-RS21850
HMJ22-RS21835.1	0.000147721	-0.391259	0.254	0.343	0.699313	1	HMJ22-RS21835
HMJ22-RS07985	0.000149306	0.329706	0.394	0.344	0.706817	1	HMJ22-RS07985
HMJ22-RS03010.1	0.00018007	-0.322321	0.319	0.416	0.852453	1	HMJ22-RS03010
HMJ22-RS04730.1	0.000234888	-0.295422	0.442	0.537	1	1	HMJ22-RS04730
HMJ22-RS01120	0.00026452	-0.27035	0.176	0.258	1	1	HMJ22-RS01120
HMJ22-RS12705	0.000418155	0.391615	0.378	0.337	1	1	HMJ22-RS12705
HMJ22-RS12840	0.000567816	-0.295672	0.187	0.264	1	1	HMJ22-RS12840
HMJ22-RS03565	0.000758979	-0.415398	0.324	0.402	1	1	HMJ22-RS03565
HMJ22-RS13985.1	0.000963135	-0.302398	0.182	0.251	1	1	HMJ22-RS13985
HMJ22-RS05360	0.00105725	0.316782	0.334	0.29	1	1	HMJ22-RS05360
HMJ22-RS04685	0.00110329	0.277624	0.467	0.421	1	1	HMJ22-RS04685
HMJ22-RS10155	0.00161688	0.349744	0.321	0.285	1	1	HMJ22-RS10155
HMJ22-RS12720.1	0.00186428	0.29971	0.372	0.336	1	1	HMJ22-RS12720
HMJ22-RS02235	0.00190386	0.436966	0.296	0.263	1	1	HMJ22-RS02235
HMJ22-RS20810.1	0.00194391	0.369034	0.263	0.222	1	1	HMJ22-RS20810
HMJ22-RS02865	0.00196735	-0.330625	0.267	0.345	1	1	HMJ22-RS02865
HMJ22-RS21960.1	0.00198266	-0.324609	0.263	0.341	1	1	HMJ22-RS21960
HMJ22-RS05410.1	0.00237068	-0.258154	0.275	0.356	1	1	HMJ22-RS05410
HMJ22-RS02130.1	0.00310221	0.299716	0.3	0.263	1	1	HMJ22-RS02130
HMJ22-RS05715.1	0.00323895	-0.2833	0.213	0.283	1	1	HMJ22-RS05715
HMJ22-RS05430.1	0.00392916	-0.261722	0.304	0.38	1	1	HMJ22-RS05430
HMJ22-RS12175.1	0.00437791	-0.327096	0.269	0.339	1	1	HMJ22-RS12175
HMJ22-RS19665.1	0.00523222	-0.319152	0.437	0.493	1	1	HMJ22-RS19665
HMJ22-RS14375	0.00598343	0.304912	0.306	0.276	1	1	HMJ22-RS14375
HMJ22-RS23875	0.00736346	-0.256183	0.315	0.39	1	1	HMJ22-RS23875
HMJ22-RS03700	0.00796835	-0.254212	0.213	0.277	1	1	HMJ22-RS03700
HMJ22-RS02135	0.00813416	0.29897	0.327	0.297	1	1	HMJ22-RS02135
HMJ22-RS24335	0.00819341	-0.303766	0.254	0.323	1	1	HMJ22-RS24335
HMJ22-RS07070.1	0.00933801	0.287553	0.325	0.299	1	1	HMJ22-RS07070
HMJ22-RS04850	3.51e-81	0.72168	0.427	0.087	1.66e-77	2	HMJ22-RS04850
HMJ22-RS13115	1.4e-77	0.911486	0.337	0.059	6.63e-74	2	HMJ22-RS13115
HMJ22-RS06510.1	2.01e-76	0.695544	0.58	0.158	9.53e-73	2	HMJ22-RS06510
HMJ22-RS08320	6.26e-63	0.698926	0.41	0.102	2.96e-59	2	HMJ22-RS08320
HMJ22-RS06500.2	2.21e-61	0.711638	0.931	0.458	1.05e-57	2	HMJ22-RS06500
HMJ22-RS12715.1	3.15e-61	0.672236	0.653	0.226	1.49e-57	2	HMJ22-RS12715
HMJ22-RS16055	1.83e-57	0.690025	0.414	0.113	8.68e-54	2	HMJ22-RS16055
HMJ22-RS06505	4.77e-56	0.592581	0.48	0.143	2.26e-52	2	HMJ22-RS06505
HMJ22-RS23680	6.99e-56	0.564762	0.478	0.143	3.31e-52	2	HMJ22-RS23680
HMJ22-RS05360.1	2.06e-53	0.591183	0.651	0.243	9.77e-50	2	HMJ22-RS05360
HMJ22-RS06495.1	1.22e-49	0.519877	0.616	0.228	5.78e-46	2	HMJ22-RS06495
HMJ22-RS06515	6.6e-49	0.522456	0.38	0.109	3.13e-45	2	HMJ22-RS06515
HMJ22-RS04360	5.83e-46	0.483871	0.375	0.108	2.76e-42	2	HMJ22-RS04360
HMJ22-RS00525	1.42e-45	0.558587	0.376	0.113	6.73e-42	2	HMJ22-RS00525
HMJ22-RS14810	2.54e-44	0.46705	0.369	0.109	1.2e-40	2	HMJ22-RS14810
HMJ22-RS01890	4.63e-44	0.542429	0.571	0.217	2.19e-40	2	HMJ22-RS01890
HMJ22-RS23675	1.82e-43	0.415556	0.463	0.157	8.6e-40	2	HMJ22-RS23675
HMJ22-RS07055	8.85e-43	0.470335	0.288	0.074	4.19e-39	2	HMJ22-RS07055
HMJ22-RS22410	1.52e-42	0.553674	0.325	0.093	7.21e-39	2	HMJ22-RS22410
HMJ22-RS13830	1.1e-41	0.467024	0.41	0.135	5.22e-38	2	HMJ22-RS13830
HMJ22-RS01600	1.81e-41	0.390475	0.341	0.101	8.59e-38	2	HMJ22-RS01600
HMJ22-RS09480	1.82e-41	0.483796	0.298	0.081	8.6e-38	2	HMJ22-RS09480
HMJ22-RS01450	6.19e-41	0.44881	0.471	0.167	2.93e-37	2	HMJ22-RS01450
HMJ22-RS12710	2.26e-40	0.41064	0.351	0.107	1.07e-36	2	HMJ22-RS12710
HMJ22-RS01595	8.15e-40	0.500007	0.355	0.111	3.86e-36	2	HMJ22-RS01595
HMJ22-RS13475	2.44e-39	0.40238	0.304	0.086	1.16e-35	2	HMJ22-RS13475
HMJ22-RS16985	3.47e-38	0.362721	0.451	0.162	1.64e-34	2	HMJ22-RS16985
HMJ22-RS07050	5.1e-38	0.501325	0.265	0.071	2.41e-34	2	HMJ22-RS07050
HMJ22-RS24305.2	7.15e-38	0.439654	0.678	0.298	3.38e-34	2	HMJ22-RS24305
HMJ22-RS03070	1.33e-37	0.328764	0.467	0.171	6.32e-34	2	HMJ22-RS03070
HMJ22-RS20950	2.12e-37	0.304102	0.375	0.122	1e-33	2	HMJ22-RS20950
HMJ22-RS06485.1	4.62e-37	0.515632	0.875	0.456	2.19e-33	2	HMJ22-RS06485
HMJ22-RS08675	8.25e-37	0.408076	0.273	0.076	3.9e-33	2	HMJ22-RS08675
HMJ22-RS24320	8.48e-37	0.44437	0.312	0.095	4.02e-33	2	HMJ22-RS24320
HMJ22-RS00805	2.6e-36	0.423013	0.443	0.164	1.23e-32	2	HMJ22-RS00805
HMJ22-RS13640	5.4e-36	0.384319	0.275	0.077	2.56e-32	2	HMJ22-RS13640
HMJ22-RS13935	7.07e-36	0.335991	0.376	0.128	3.35e-32	2	HMJ22-RS13935
HMJ22-RS02165	8.83e-36	0.324634	0.371	0.123	4.18e-32	2	HMJ22-RS02165
HMJ22-RS21245	3.58e-35	0.438736	0.298	0.091	1.69e-31	2	HMJ22-RS21245
HMJ22-RS22210	3.78e-35	0.410656	0.294	0.089	1.79e-31	2	HMJ22-RS22210
HMJ22-RS02130.2	1.01e-34	0.319061	0.555	0.224	4.77e-31	2	HMJ22-RS02130
HMJ22-RS07450	1.98e-33	0.262969	0.416	0.153	9.37e-30	2	HMJ22-RS07450
HMJ22-RS04725	6.64e-33	0.457606	0.308	0.101	3.14e-29	2	HMJ22-RS04725
HMJ22-RS07065	1.25e-32	0.391444	0.357	0.126	5.92e-29	2	HMJ22-RS07065
HMJ22-RS23135	2.33e-32	0.363122	0.418	0.157	1.1e-28	2	HMJ22-RS23135
HMJ22-RS01885	3.91e-32	0.263843	0.28	0.086	1.85e-28	2	HMJ22-RS01885
HMJ22-RS21955	4.08e-32	0.353431	0.361	0.129	1.93e-28	2	HMJ22-RS21955
HMJ22-RS02235.1	4.53e-32	0.348945	0.537	0.226	2.15e-28	2	HMJ22-RS02235
HMJ22-RS10750	1.83e-31	0.308072	0.431	0.166	8.68e-28	2	HMJ22-RS10750
HMJ22-RS04980	2.7e-31	0.274784	0.316	0.106	1.28e-27	2	HMJ22-RS04980
HMJ22-RS12570.2	3.12e-31	0.360412	0.724	0.341	1.48e-27	2	HMJ22-RS12570
HMJ22-RS18200	3.34e-31	0.353336	0.302	0.099	1.58e-27	2	HMJ22-RS18200
HMJ22-RS06845	5.16e-31	0.392096	0.273	0.086	2.44e-27	2	HMJ22-RS06845
HMJ22-RS08570.1	5.82e-31	0.348453	0.557	0.241	2.75e-27	2	HMJ22-RS08570
HMJ22-RS02925	1.73e-30	0.379708	0.394	0.152	8.2e-27	2	HMJ22-RS02925
HMJ22-RS01925	3.77e-30	0.350598	0.396	0.153	1.79e-26	2	HMJ22-RS01925
HMJ22-RS10210	5.54e-30	0.33639	0.316	0.109	2.62e-26	2	HMJ22-RS10210
HMJ22-RS20665	6.15e-30	0.289498	0.498	0.207	2.91e-26	2	HMJ22-RS20665
HMJ22-RS10445.1	8.85e-30	0.269534	0.492	0.205	4.19e-26	2	HMJ22-RS10445
HMJ22-RS20815.1	1.48e-29	0.298656	0.478	0.198	7.02e-26	2	HMJ22-RS20815
HMJ22-RS10035	7.04e-29	0.297849	0.267	0.086	3.33e-25	2	HMJ22-RS10035
HMJ22-RS12895.2	7.58e-29	0.258192	1	0.969	3.59e-25	2	HMJ22-RS12895
HMJ22-RS14405	7.74e-29	0.353903	0.312	0.109	3.66e-25	2	HMJ22-RS14405
HMJ22-RS02140.1	8.24e-29	0.368043	0.78	0.4	3.9e-25	2	HMJ22-RS02140
HMJ22-RS00950	1.41e-28	0.264216	0.378	0.144	6.66e-25	2	HMJ22-RS00950
HMJ22-RS15865	1.6e-28	0.313718	0.437	0.179	7.59e-25	2	HMJ22-RS15865
HMJ22-RS04675	3.35e-28	0.329406	0.276	0.093	1.59e-24	2	HMJ22-RS04675
HMJ22-RS20080	8.96e-28	0.323281	0.294	0.103	4.24e-24	2	HMJ22-RS20080
HMJ22-RS23670.2	1.3e-27	0.264347	1	0.951	6.16e-24	2	HMJ22-RS23670
HMJ22-RS24510	3.21e-27	0.286958	0.284	0.098	1.52e-23	2	HMJ22-RS24510
HMJ22-RS16085	5.72e-27	0.316428	0.418	0.172	2.71e-23	2	HMJ22-RS16085
HMJ22-RS20345	7.55e-27	0.345906	0.302	0.109	3.58e-23	2	HMJ22-RS20345
HMJ22-RS01170	7.68e-27	0.283703	0.343	0.131	3.63e-23	2	HMJ22-RS01170
HMJ22-RS13235	1.3e-26	0.261396	0.533	0.241	6.15e-23	2	HMJ22-RS13235
HMJ22-RS19420	2e-26	0.374963	0.259	0.088	9.45e-23	2	HMJ22-RS19420
HMJ22-RS18950	6.54e-26	0.297185	0.406	0.169	3.1e-22	2	HMJ22-RS18950
HMJ22-RS06850.2	2.02e-25	0.334218	0.986	0.768	9.56e-22	2	HMJ22-RS06850
HMJ22-RS04685.1	2.34e-25	0.312583	0.753	0.379	1.11e-21	2	HMJ22-RS04685
HMJ22-RS24915	3.8e-25	0.301487	0.3	0.111	1.8e-21	2	HMJ22-RS24915
HMJ22-RS23000	5.68e-25	0.252846	0.378	0.156	2.69e-21	2	HMJ22-RS23000
HMJ22-RS14780	1.64e-24	0.280562	0.329	0.13	7.78e-21	2	HMJ22-RS14780
HMJ22-RS17995	2.16e-24	0.257373	0.302	0.115	1.02e-20	2	HMJ22-RS17995
HMJ22-RS24500	6.65e-23	0.288721	0.329	0.135	3.15e-19	2	HMJ22-RS24500
HMJ22-RS21980	7.66e-23	0.311335	0.39	0.171	3.63e-19	2	HMJ22-RS21980
HMJ22-RS14600	1.37e-22	0.252954	0.304	0.12	6.48e-19	2	HMJ22-RS14600
HMJ22-RS06490.2	5.36e-21	0.329623	0.967	0.687	2.54e-17	2	HMJ22-RS06490
HMJ22-RS04785.1	1.55e-20	0.313138	0.92	0.575	7.34e-17	2	HMJ22-RS04785
HMJ22-RS23815.1	3.65e-20	0.273877	0.741	0.401	1.73e-16	2	HMJ22-RS23815
HMJ22-RS00810.2	3.68e-19	-0.531855	0.994	0.913	1.74e-15	2	HMJ22-RS00810
HMJ22-RS04790.2	1.65e-18	0.301674	0.976	0.702	7.83e-15	2	HMJ22-RS04790
HMJ22-RS07440.2	2.78e-16	-0.560559	0.965	0.844	1.32e-12	2	HMJ22-RS07440
HMJ22-RS05560.2	1.2e-09	-0.593176	0.875	0.679	5.68e-06	2	HMJ22-RS05560
HMJ22-RS17470	3.42e-09	-0.300722	0.263	0.138	1.62e-05	2	HMJ22-RS17470
HMJ22-RS08100	2.87e-08	-0.269129	0.308	0.172	0.000136084	2	HMJ22-RS08100
HMJ22-RS05645.1	5.82e-08	-0.279475	0.406	0.231	0.000275659	2	HMJ22-RS05645
HMJ22-RS19965	7.42e-08	-0.278932	0.263	0.145	0.000351403	2	HMJ22-RS19965
HMJ22-RS07815	7.6e-08	-0.297873	0.314	0.178	0.000359794	2	HMJ22-RS07815
HMJ22-RS23705	1.53e-07	-0.302615	0.257	0.143	0.000723595	2	HMJ22-RS23705
HMJ22-RS02730	3.11e-07	-0.25475	0.535	0.317	0.00147273	2	HMJ22-RS02730
HMJ22-RS02155	3.72e-07	-0.274751	0.259	0.147	0.00176323	2	HMJ22-RS02155
HMJ22-RS14590	5.82e-07	-0.288356	0.282	0.164	0.00275619	2	HMJ22-RS14590
HMJ22-RS22395	1.3e-06	-0.284121	0.392	0.235	0.00616412	2	HMJ22-RS22395
HMJ22-RS21960.2	1.61e-06	-0.271115	0.498	0.3	0.00761797	2	HMJ22-RS21960
HMJ22-RS03275	1.93e-06	-0.342229	0.29	0.172	0.00915461	2	HMJ22-RS03275
HMJ22-RS15105.1	2.17e-06	-0.265757	0.414	0.251	0.0102896	2	HMJ22-RS15105
HMJ22-RS07940.1	2.17e-06	-0.290443	0.327	0.197	0.0102929	2	HMJ22-RS07940
HMJ22-RS20340	2.89e-06	-0.357229	0.302	0.18	0.0136616	2	HMJ22-RS20340
HMJ22-RS16885	4.98e-06	-0.269978	0.31	0.189	0.0235934	2	HMJ22-RS16885
HMJ22-RS05620	6.47e-06	-0.353516	0.253	0.15	0.0306415	2	HMJ22-RS05620
HMJ22-RS13480	7.28e-06	-0.311831	0.257	0.154	0.0344511	2	HMJ22-RS13480
HMJ22-RS05715.2	8.21e-06	-0.288373	0.404	0.249	0.0388612	2	HMJ22-RS05715
HMJ22-RS02890	1.05e-05	-0.250248	0.259	0.157	0.0498898	2	HMJ22-RS02890
HMJ22-RS21835.2	1.28e-05	-0.284493	0.492	0.301	0.060606	2	HMJ22-RS21835
HMJ22-RS03770	1.55e-05	-0.308808	0.261	0.158	0.0733215	2	HMJ22-RS03770
HMJ22-RS19630.1	3.33e-05	-0.314332	0.325	0.205	0.157526	2	HMJ22-RS19630
HMJ22-RS05410.2	4.4e-05	-0.322327	0.504	0.316	0.208227	2	HMJ22-RS05410
HMJ22-RS15520.1	6.13e-05	-0.339506	0.337	0.215	0.290429	2	HMJ22-RS15520
HMJ22-RS13825.1	6.27e-05	-0.265735	0.461	0.295	0.296802	2	HMJ22-RS13825
HMJ22-RS11480	7.75e-05	-0.331249	0.296	0.189	0.367064	2	HMJ22-RS11480
HMJ22-RS03875	8.66e-05	-0.361677	0.265	0.167	0.409802	2	HMJ22-RS03875
HMJ22-RS15900	0.000162601	-0.380741	0.459	0.291	0.769752	2	HMJ22-RS15900
HMJ22-RS09625.2	0.000179367	-0.843958	0.639	0.5	0.849125	2	HMJ22-RS09625
HMJ22-RS17010.1	0.000236643	-0.312825	0.492	0.317	1	2	HMJ22-RS17010
HMJ22-RS15390.1	0.000286164	-0.339949	0.498	0.321	1	2	HMJ22-RS15390
HMJ22-RS03565.1	0.000359102	-0.34444	0.565	0.361	1	2	HMJ22-RS03565
HMJ22-RS05430.2	0.000567497	-0.264746	0.527	0.341	1	2	HMJ22-RS05430
HMJ22-RS02880.1	0.00262867	-0.517479	0.29	0.197	1	2	HMJ22-RS02880
HMJ22-RS19815.2	0.00343958	-0.399182	0.427	0.291	1	2	HMJ22-RS19815
HMJ22-RS21850.2	0.00367239	-0.321874	0.567	0.376	1	2	HMJ22-RS21850
HMJ22-RS13985.2	0.00430227	-0.481362	0.327	0.225	1	2	HMJ22-RS13985
HMJ22-RS23890.2	0.00811681	-0.559696	0.351	0.241	1	2	HMJ22-RS23890
HMJ22-RS00810.3	8.7e-64	0.785821	0.962	0.918	4.12e-60	3	HMJ22-RS00810
HMJ22-RS06500.3	4.8e-54	-1.6392	0.147	0.579	2.27e-50	3	HMJ22-RS06500
HMJ22-RS07440.3	2.26e-45	0.772876	0.907	0.853	1.07e-41	3	HMJ22-RS07440
HMJ22-RS06485.2	1e-38	-1.13966	0.173	0.564	4.74e-35	3	HMJ22-RS06485
HMJ22-RS12715.2	5.13e-36	-1.85418	0.036	0.322	2.43e-32	3	HMJ22-RS12715
HMJ22-RS23670.3	9.8e-34	-0.521667	0.847	0.974	4.64e-30	3	HMJ22-RS23670
HMJ22-RS06495.2	2.38e-29	-1.22116	0.054	0.315	1.13e-25	3	HMJ22-RS06495
HMJ22-RS23815.2	5.83e-26	-0.733171	0.169	0.49	2.76e-22	3	HMJ22-RS23815
HMJ22-RS05360.2	1.76e-24	-1.054	0.083	0.331	8.32e-21	3	HMJ22-RS05360
HMJ22-RS04685.2	1.11e-23	-0.751694	0.169	0.469	5.27e-20	3	HMJ22-RS04685
HMJ22-RS06850.3	1.18e-23	-0.577279	0.51	0.841	5.58e-20	3	HMJ22-RS06850
HMJ22-RS06490.3	1.81e-23	-0.590725	0.415	0.773	8.58e-20	3	HMJ22-RS06490
HMJ22-RS08245	3.07e-23	0.373104	0.976	0.983	1.45e-19	3	HMJ22-RS08245
HMJ22-RS12570.3	1.4e-22	-0.685284	0.149	0.431	6.64e-19	3	HMJ22-RS12570
HMJ22-RS08120.1	8.5e-21	0.342484	0.972	0.975	4.03e-17	3	HMJ22-RS08120
HMJ22-RS02235.2	1.41e-19	-0.784947	0.083	0.297	6.65e-16	3	HMJ22-RS02235
HMJ22-RS13510	6.76e-19	-0.44121	0.192	0.476	3.2e-15	3	HMJ22-RS13510
HMJ22-RS04855	2.04e-18	-0.505574	0.167	0.431	9.67e-15	3	HMJ22-RS04855
HMJ22-RS08815	5.42e-18	-0.560439	0.083	0.287	2.57e-14	3	HMJ22-RS08815
HMJ22-RS12720.2	1.08e-17	-0.570672	0.137	0.374	5.1e-14	3	HMJ22-RS12720
HMJ22-RS19740	2.74e-17	-0.498705	0.397	0.737	1.3e-13	3	HMJ22-RS19740
HMJ22-RS16935.1	7.19e-17	-0.428319	0.171	0.429	3.4e-13	3	HMJ22-RS16935
HMJ22-RS24305.3	8.47e-17	-0.57384	0.147	0.381	4.01e-13	3	HMJ22-RS24305
HMJ22-RS01890.1	8.86e-17	-0.584604	0.091	0.291	4.2e-13	3	HMJ22-RS01890
HMJ22-RS08835	1.7e-16	-0.526836	0.127	0.349	8.06e-13	3	HMJ22-RS08835
HMJ22-RS12895.3	2.49e-16	-0.31906	0.905	0.984	1.18e-12	3	HMJ22-RS12895
HMJ22-RS10155.1	2.77e-16	-0.544324	0.111	0.319	1.31e-12	3	HMJ22-RS10155
HMJ22-RS22905	3.07e-16	-0.263483	0.185	0.45	1.45e-12	3	HMJ22-RS22905
HMJ22-RS19070	4.26e-16	-0.43707	0.079	0.266	2.02e-12	3	HMJ22-RS19070
HMJ22-RS02905	4.65e-16	-0.535529	0.139	0.362	2.2e-12	3	HMJ22-RS02905
HMJ22-RS20905	1.65e-15	-0.420721	0.188	0.438	7.82e-12	3	HMJ22-RS20905
HMJ22-RS10535	2.18e-15	-0.559772	0.087	0.272	1.03e-11	3	HMJ22-RS10535
HMJ22-RS10445.2	2.54e-15	-0.544126	0.085	0.268	1.2e-11	3	HMJ22-RS10445
HMJ22-RS02130.3	2.72e-15	-0.470098	0.101	0.295	1.29e-11	3	HMJ22-RS02130
HMJ22-RS08570.2	4.83e-15	-0.47586	0.111	0.31	2.28e-11	3	HMJ22-RS08570
HMJ22-RS21720	5.12e-15	-0.533361	0.081	0.259	2.42e-11	3	HMJ22-RS21720
HMJ22-RS13235.1	5.73e-15	-0.508099	0.111	0.306	2.71e-11	3	HMJ22-RS13235
HMJ22-RS16020	4.17e-14	-0.343849	0.127	0.328	1.97e-10	3	HMJ22-RS16020
HMJ22-RS20810.2	6.8e-14	-0.493323	0.083	0.252	3.22e-10	3	HMJ22-RS20810
HMJ22-RS19675	8.68e-14	-0.38995	0.194	0.436	4.11e-10	3	HMJ22-RS19675
HMJ22-RS21800	9.44e-14	-0.40055	0.083	0.251	4.47e-10	3	HMJ22-RS21800
HMJ22-RS18895	9.95e-14	-0.269925	0.194	0.436	4.71e-10	3	HMJ22-RS18895
HMJ22-RS19745	1.72e-13	-0.28343	0.089	0.262	8.13e-10	3	HMJ22-RS19745
HMJ22-RS21985	2.53e-13	-0.29997	0.161	0.379	1.2e-09	3	HMJ22-RS21985
HMJ22-RS00670.1	3.29e-13	-0.452595	0.093	0.263	1.56e-09	3	HMJ22-RS00670
HMJ22-RS14375.1	3.6e-13	-0.350179	0.119	0.306	1.71e-09	3	HMJ22-RS14375
HMJ22-RS12705.1	3.77e-13	-0.341656	0.159	0.373	1.79e-09	3	HMJ22-RS12705
HMJ22-RS16320	3.87e-13	-0.484006	0.107	0.286	1.83e-09	3	HMJ22-RS16320
HMJ22-RS02135.1	9.97e-13	-0.367846	0.135	0.328	4.72e-09	3	HMJ22-RS02135
HMJ22-RS07070.2	1.12e-12	-0.287868	0.135	0.33	5.31e-09	3	HMJ22-RS07070
HMJ22-RS05350.1	2.92e-12	-0.475792	0.097	0.26	1.38e-08	3	HMJ22-RS05350
HMJ22-RS20815.2	5.21e-11	-0.255564	0.101	0.257	2.46e-07	3	HMJ22-RS20815
HMJ22-RS03660	1.31e-10	-0.262555	0.312	0.585	6.2e-07	3	HMJ22-RS03660
HMJ22-RS09625.3	6.4e-10	0.822229	0.508	0.521	3.03e-06	3	HMJ22-RS09625
HMJ22-RS04790.3	1.12e-09	-0.358142	0.506	0.775	5.32e-06	3	HMJ22-RS04790
HMJ22-RS07650.2	7.6e-09	0.831835	0.478	0.467	3.6e-05	3	HMJ22-RS07650
HMJ22-RS05560.3	1.34e-08	0.464169	0.669	0.711	6.33e-05	3	HMJ22-RS05560
HMJ22-RS01180.2	5.22e-08	0.761145	0.506	0.536	0.000247197	3	HMJ22-RS01180
HMJ22-RS07060.1	1.62e-06	-0.31075	0.544	0.785	0.00765789	3	HMJ22-RS07060
HMJ22-RS23890.3	0.000120704	1.11005	0.278	0.252	0.571415	3	HMJ22-RS23890
HMJ22-RS16930.1	0.000132378	0.419196	0.585	0.692	0.626678	3	HMJ22-RS16930
HMJ22-RS24335.1	0.000147254	0.325235	0.192	0.329	0.697103	3	HMJ22-RS24335
HMJ22-RS21920.1	0.000157636	0.309903	0.157	0.272	0.746248	3	HMJ22-RS21920
HMJ22-RS07435	0.000222702	0.258768	0.165	0.281	1	3	HMJ22-RS07435
HMJ22-RS12840.1	0.000258716	0.290096	0.155	0.265	1	3	HMJ22-RS12840
HMJ22-RS21960.3	0.000400862	0.372317	0.208	0.346	1	3	HMJ22-RS21960
HMJ22-RS16140	0.00049734	0.317283	0.7	0.805	1	3	HMJ22-RS16140
HMJ22-RS03420.1	0.00108234	0.364419	0.212	0.345	1	3	HMJ22-RS03420
HMJ22-RS03010.2	0.00113915	0.274324	0.26	0.42	1	3	HMJ22-RS03010
HMJ22-RS05410.3	0.00146576	0.285564	0.224	0.359	1	3	HMJ22-RS05410
HMJ22-RS22340	0.00165727	0.284672	0.226	0.36	1	3	HMJ22-RS22340
HMJ22-RS17010.2	0.00171048	0.367154	0.224	0.359	1	3	HMJ22-RS17010
HMJ22-RS21835.3	0.00226462	0.370131	0.214	0.344	1	3	HMJ22-RS21835
HMJ22-RS13120.1	0.00240782	0.323536	0.254	0.403	1	3	HMJ22-RS13120
HMJ22-RS15525.2	0.00247663	0.839799	0.369	0.404	1	3	HMJ22-RS15525
HMJ22-RS03570	0.00303014	0.271987	0.274	0.435	1	3	HMJ22-RS03570
HMJ22-RS00555.1	0.00327714	0.391036	0.188	0.296	1	3	HMJ22-RS00555
HMJ22-RS17005.1	0.00387513	0.292257	0.262	0.411	1	3	HMJ22-RS17005
HMJ22-RS03225.1	0.00430383	0.506641	0.171	0.271	1	3	HMJ22-RS03225
HMJ22-RS22675	0.00514445	0.435457	0.19	0.297	1	3	HMJ22-RS22675
HMJ22-RS03700.1	0.00563976	0.432971	0.179	0.279	1	3	HMJ22-RS03700
HMJ22-RS08780	0.00861416	0.487508	0.163	0.251	1	3	HMJ22-RS08780
HMJ22-RS00810.4	3.84e-80	0.743162	1	0.913	1.82e-76	4	HMJ22-RS00810
HMJ22-RS08120.2	2.82e-49	0.477408	0.996	0.972	1.33e-45	4	HMJ22-RS08120
HMJ22-RS07440.4	2.78e-47	0.62384	0.982	0.843	1.32e-43	4	HMJ22-RS07440
HMJ22-RS06500.4	1.08e-45	-1.82332	0.217	0.565	5.11e-42	4	HMJ22-RS06500
HMJ22-RS08245.1	3.4e-37	0.388498	1	0.98	1.61e-33	4	HMJ22-RS08245
HMJ22-RS09625.4	1.77e-31	0.863422	0.726	0.491	8.39e-28	4	HMJ22-RS09625
HMJ22-RS01180.3	5.16e-31	0.833664	0.731	0.504	2.44e-27	4	HMJ22-RS01180
HMJ22-RS05560.4	1.24e-28	0.624133	0.886	0.681	5.85e-25	4	HMJ22-RS05560
HMJ22-RS07650.3	1.31e-26	0.678984	0.672	0.44	6.2e-23	4	HMJ22-RS07650
HMJ22-RS06490.4	2.1e-25	-0.807401	0.575	0.746	9.96e-22	4	HMJ22-RS06490
HMJ22-RS06485.3	2.67e-25	-1.24075	0.302	0.542	1.26e-21	4	HMJ22-RS06485
HMJ22-RS12715.3	3.13e-21	-1.54676	0.092	0.311	1.48e-17	4	HMJ22-RS12715
HMJ22-RS06495.3	6.2e-21	-1.52911	0.09	0.307	2.93e-17	4	HMJ22-RS06495
HMJ22-RS22860.1	1.08e-20	1.08932	0.35	0.181	5.11e-17	4	HMJ22-RS22860
HMJ22-RS23670.4	1.58e-18	-0.393835	0.974	0.955	7.48e-15	4	HMJ22-RS23670
HMJ22-RS15525.3	5.25e-18	0.715604	0.554	0.378	2.48e-14	4	HMJ22-RS15525
HMJ22-RS01175.2	7.26e-18	0.512484	0.779	0.594	3.44e-14	4	HMJ22-RS01175
HMJ22-RS12895.4	3.53e-17	-0.368866	0.976	0.973	1.67e-13	4	HMJ22-RS12895
HMJ22-RS07800.2	2.2e-15	0.564638	0.613	0.447	1.04e-11	4	HMJ22-RS07800
HMJ22-RS06850.4	8.79e-15	-0.524422	0.744	0.805	4.16e-11	4	HMJ22-RS06850
HMJ22-RS12730	2.1e-14	1.00351	0.258	0.133	9.95e-11	4	HMJ22-RS12730
HMJ22-RS23890.4	1.59e-13	0.744239	0.381	0.238	7.52e-10	4	HMJ22-RS23890
HMJ22-RS13615	1.84e-12	0.827762	0.28	0.158	8.73e-09	4	HMJ22-RS13615
HMJ22-RS12880	2.64e-12	0.431171	0.77	0.634	1.25e-08	4	HMJ22-RS12880
HMJ22-RS00125	3.25e-12	0.984171	0.252	0.138	1.54e-08	4	HMJ22-RS00125
HMJ22-RS15520.2	1.43e-10	0.786306	0.333	0.217	6.77e-07	4	HMJ22-RS15520
HMJ22-RS04685.3	5.97e-10	-0.766024	0.295	0.448	2.83e-06	4	HMJ22-RS04685
HMJ22-RS22995.2	6.83e-10	0.490942	0.51	0.375	3.24e-06	4	HMJ22-RS22995
HMJ22-RS24305.4	2.73e-09	-0.764662	0.217	0.368	1.29e-05	4	HMJ22-RS24305
HMJ22-RS04730.2	4.04e-09	0.390927	0.641	0.503	1.91e-05	4	HMJ22-RS04730
HMJ22-RS15390.2	6.31e-09	0.437631	0.451	0.33	2.99e-05	4	HMJ22-RS15390
HMJ22-RS21960.4	7.68e-09	0.500044	0.422	0.314	3.63e-05	4	HMJ22-RS21960
HMJ22-RS12570.4	2.34e-08	-0.685395	0.267	0.411	0.000110917	4	HMJ22-RS12570
HMJ22-RS16140.1	3.11e-08	0.281278	0.895	0.777	0.000147283	4	HMJ22-RS16140
HMJ22-RS05360.3	5.41e-08	-0.78276	0.184	0.314	0.000256277	4	HMJ22-RS05360
HMJ22-RS21850.3	5.67e-08	0.505394	0.492	0.389	0.000268215	4	HMJ22-RS21850
HMJ22-RS10445.3	1.19e-07	-0.76464	0.138	0.259	0.000561871	4	HMJ22-RS10445
HMJ22-RS15900.1	1.33e-07	0.491834	0.405	0.302	0.00063037	4	HMJ22-RS15900
HMJ22-RS08215.2	3.22e-07	0.365568	0.54	0.442	0.00152601	4	HMJ22-RS08215
HMJ22-RS05350.2	3.86e-07	-0.707512	0.138	0.252	0.0018256	4	HMJ22-RS05350
HMJ22-RS03700.2	7.05e-07	0.514855	0.346	0.254	0.00333781	4	HMJ22-RS03700
HMJ22-RS07815.1	9.88e-07	0.637435	0.269	0.187	0.00467526	4	HMJ22-RS07815
HMJ22-RS19665.2	1.14e-06	0.321713	0.569	0.471	0.00538294	4	HMJ22-RS19665
HMJ22-RS21835.4	1.24e-06	0.510736	0.4	0.317	0.00584916	4	HMJ22-RS21835
HMJ22-RS04790.4	1.99e-06	-0.367015	0.702	0.745	0.00940744	4	HMJ22-RS04790
HMJ22-RS21350.2	2.01e-06	0.494447	0.333	0.246	0.00950239	4	HMJ22-RS21350
HMJ22-RS01580.1	4.58e-06	0.428654	0.444	0.361	0.021701	4	HMJ22-RS01580
HMJ22-RS19740.1	5.7e-06	-0.383621	0.681	0.694	0.0269847	4	HMJ22-RS19740
HMJ22-RS02730.1	6.82e-06	0.329792	0.425	0.336	0.0322753	4	HMJ22-RS02730
HMJ22-RS01890.2	1.21e-05	-0.57303	0.171	0.278	0.057365	4	HMJ22-RS01890
HMJ22-RS12175.2	1.42e-05	0.48324	0.389	0.317	0.0672326	4	HMJ22-RS12175
HMJ22-RS02235.3	1.68e-05	-0.497695	0.175	0.282	0.079424	4	HMJ22-RS02235
HMJ22-RS10560	1.89e-05	0.648506	0.256	0.188	0.0894126	4	HMJ22-RS10560
HMJ22-RS07910.1	2.02e-05	0.438014	0.442	0.369	0.0957984	4	HMJ22-RS07910
HMJ22-RS16095.1	4.93e-05	0.34901	0.49	0.416	0.233609	4	HMJ22-RS16095
HMJ22-RS07385	9.1e-05	0.586275	0.254	0.191	0.431026	4	HMJ22-RS07385
HMJ22-RS10155.2	0.000103868	-0.525741	0.204	0.304	0.491709	4	HMJ22-RS10155
HMJ22-RS16170	0.000106581	0.578487	0.254	0.192	0.504553	4	HMJ22-RS16170
HMJ22-RS13825.2	0.000125562	0.38982	0.374	0.31	0.594413	4	HMJ22-RS13825
HMJ22-RS00670.2	0.00015748	-0.410102	0.16	0.252	0.745509	4	HMJ22-RS00670
HMJ22-RS06190	0.000159261	0.345363	0.341	0.271	0.753942	4	HMJ22-RS06190
HMJ22-RS12905	0.000168652	-0.393699	0.446	0.533	0.7984	4	HMJ22-RS12905
HMJ22-RS10150.2	0.000225638	0.465822	0.293	0.234	1	4	HMJ22-RS10150
HMJ22-RS08570.3	0.000225659	-0.500645	0.204	0.295	1	4	HMJ22-RS08570
HMJ22-RS21985.1	0.000233723	-0.312598	0.258	0.363	1	4	HMJ22-RS21985
HMJ22-RS05645.2	0.000251848	0.491043	0.306	0.247	1	4	HMJ22-RS05645
HMJ22-RS02735.1	0.000258719	0.51629	0.304	0.245	1	4	HMJ22-RS02735
HMJ22-RS23815.3	0.000355625	-0.395253	0.365	0.459	1	4	HMJ22-RS23815
HMJ22-RS04690	0.000400809	-0.390649	0.225	0.323	1	4	HMJ22-RS04690
HMJ22-RS00630	0.000437078	-0.396124	0.271	0.37	1	4	HMJ22-RS00630
HMJ22-RS08815.1	0.000524439	-0.439414	0.184	0.27	1	4	HMJ22-RS08815
HMJ22-RS12885	0.000575397	-0.457188	0.214	0.303	1	4	HMJ22-RS12885
HMJ22-RS24335.2	0.000636778	0.285108	0.361	0.303	1	4	HMJ22-RS24335
HMJ22-RS05715.3	0.000716707	0.319507	0.322	0.263	1	4	HMJ22-RS05715
HMJ22-RS12720.3	0.00072214	-0.429906	0.26	0.354	1	4	HMJ22-RS12720
HMJ22-RS02130.4	0.000862411	-0.526374	0.199	0.279	1	4	HMJ22-RS02130
HMJ22-RS19625.2	0.00105167	0.358024	0.344	0.289	1	4	HMJ22-RS19625
HMJ22-RS13235.2	0.00156354	-0.430884	0.21	0.29	1	4	HMJ22-RS13235
HMJ22-RS13985.3	0.00159712	0.317342	0.287	0.232	1	4	HMJ22-RS13985
HMJ22-RS03420.2	0.00201485	0.328539	0.365	0.322	1	4	HMJ22-RS03420
HMJ22-RS18935	0.00210154	-0.36753	0.228	0.311	1	4	HMJ22-RS18935
HMJ22-RS13510.1	0.00274296	-0.37609	0.37	0.448	1	4	HMJ22-RS13510
HMJ22-RS16935.2	0.00280131	-0.348858	0.317	0.406	1	4	HMJ22-RS16935
HMJ22-RS02865.1	0.00316145	0.26118	0.372	0.325	1	4	HMJ22-RS02865
HMJ22-RS19660.1	0.00342231	-0.405898	0.186	0.257	1	4	HMJ22-RS19660
HMJ22-RS16255.2	0.00383832	0.428835	0.274	0.229	1	4	HMJ22-RS16255
HMJ22-RS07070.3	0.00448108	-0.319764	0.234	0.314	1	4	HMJ22-RS07070
HMJ22-RS03565.2	0.00814764	0.254019	0.42	0.384	1	4	HMJ22-RS03565
HMJ22-RS04785.2	0.00978809	-0.283488	0.602	0.624	1	4	HMJ22-RS04785
HMJ22-RS20905.1	0.00991539	-0.286331	0.337	0.415	1	4	HMJ22-RS20905
HMJ22-RS10985	1.61e-128	1.96251	0.392	0.043	7.63e-125	5	HMJ22-RS10985
HMJ22-RS05770	1.2e-114	1.7819	0.273	0.019	5.66e-111	5	HMJ22-RS05770
HMJ22-RS03110	4.89e-107	1.80221	0.347	0.041	2.31e-103	5	HMJ22-RS03110
HMJ22-RS14970	3.4e-95	1.65834	0.377	0.057	1.61e-91	5	HMJ22-RS14970
HMJ22-RS05970	2.29e-90	1.55804	0.251	0.023	1.08e-86	5	HMJ22-RS05970
HMJ22-RS09915	1.17e-80	1.52687	0.322	0.048	5.54e-77	5	HMJ22-RS09915
HMJ22-RS11005	3.94e-78	1.4279	0.306	0.045	1.86e-74	5	HMJ22-RS11005
HMJ22-RS10980	3.9e-77	1.34402	0.334	0.054	1.85e-73	5	HMJ22-RS10980
HMJ22-RS05775	6.41e-77	1.54652	0.263	0.032	3.04e-73	5	HMJ22-RS05775
HMJ22-RS23170	2.66e-73	1.478	0.266	0.035	1.26e-69	5	HMJ22-RS23170
HMJ22-RS23290	4.96e-73	1.59169	0.301	0.047	2.35e-69	5	HMJ22-RS23290
HMJ22-RS18915	4.46e-70	1.45691	0.258	0.035	2.11e-66	5	HMJ22-RS18915
HMJ22-RS08245.2	1.1e-67	-0.72081	0.995	0.981	5.19e-64	5	HMJ22-RS08245
HMJ22-RS09550	1.52e-67	1.28069	0.458	0.115	7.18e-64	5	HMJ22-RS09550
HMJ22-RS19910	1.37e-66	1.45205	0.43	0.105	6.49e-63	5	HMJ22-RS19910
HMJ22-RS12895.5	1.94e-66	-0.757103	0.987	0.972	9.18e-63	5	HMJ22-RS12895
HMJ22-RS18445.1	1.18e-64	0.470417	1	0.984	5.6e-61	5	HMJ22-RS18445
HMJ22-RS03455	2.3e-64	1.149	0.415	0.097	1.09e-60	5	HMJ22-RS03455
HMJ22-RS19625.3	6.67e-62	1.1862	0.673	0.251	3.16e-58	5	HMJ22-RS19625
HMJ22-RS03175	3.25e-60	1.32622	0.352	0.077	1.54e-56	5	HMJ22-RS03175
HMJ22-RS03775	1.23e-59	1.39017	0.284	0.051	5.83e-56	5	HMJ22-RS03775
HMJ22-RS23285	9.1e-58	1.14756	0.296	0.057	4.31e-54	5	HMJ22-RS23285
HMJ22-RS05430.3	5.76e-56	1.04552	0.754	0.321	2.73e-52	5	HMJ22-RS05430
HMJ22-RS10640	2.02e-54	1.16519	0.261	0.047	9.58e-51	5	HMJ22-RS10640
HMJ22-RS22995.3	8.56e-54	1.02497	0.762	0.348	4.05e-50	5	HMJ22-RS22995
HMJ22-RS22865	1.27e-53	1.12472	0.334	0.076	6e-50	5	HMJ22-RS22865
HMJ22-RS00785	6.13e-53	1.13211	0.266	0.05	2.9e-49	5	HMJ22-RS00785
HMJ22-RS16075	9.36e-53	1.07149	0.448	0.132	4.43e-49	5	HMJ22-RS16075
HMJ22-RS11475	4.03e-52	1.13157	0.367	0.094	1.91e-48	5	HMJ22-RS11475
HMJ22-RS05275	8.91e-52	1.1407	0.284	0.058	4.22e-48	5	HMJ22-RS05275
HMJ22-RS03260	8.15e-50	1.12446	0.352	0.09	3.86e-46	5	HMJ22-RS03260
HMJ22-RS21930	1.25e-49	1.17374	0.286	0.062	5.92e-46	5	HMJ22-RS21930
HMJ22-RS23160	1.67e-48	1.15866	0.334	0.084	7.93e-45	5	HMJ22-RS23160
HMJ22-RS00470	8.77e-48	1.27334	0.256	0.052	4.15e-44	5	HMJ22-RS00470
HMJ22-RS23490	1.56e-47	1.17417	0.271	0.058	7.37e-44	5	HMJ22-RS23490
HMJ22-RS09070.1	1.56e-47	0.8792	0.691	0.292	7.37e-44	5	HMJ22-RS09070
HMJ22-RS05425	1.7e-47	1.07135	0.397	0.116	8.04e-44	5	HMJ22-RS05425
HMJ22-RS18935.1	5.87e-47	0.950686	0.635	0.261	2.78e-43	5	HMJ22-RS18935
HMJ22-RS20230	1e-46	1.09881	0.306	0.074	4.75e-43	5	HMJ22-RS20230
HMJ22-RS01160	2.44e-46	0.87702	0.451	0.141	1.16e-42	5	HMJ22-RS01160
HMJ22-RS21870	3.42e-44	1.06164	0.365	0.104	1.62e-40	5	HMJ22-RS21870
HMJ22-RS03005	3.96e-44	0.943128	0.552	0.21	1.87e-40	5	HMJ22-RS03005
HMJ22-RS17560.1	4.3e-44	0.906051	0.522	0.189	2.04e-40	5	HMJ22-RS17560
HMJ22-RS22850	4.53e-44	0.935471	0.261	0.056	2.14e-40	5	HMJ22-RS22850
HMJ22-RS20060	3.67e-43	1.01784	0.4	0.125	1.74e-39	5	HMJ22-RS20060
HMJ22-RS22120	1.6e-42	0.946158	0.342	0.095	7.56e-39	5	HMJ22-RS22120
HMJ22-RS21890	3.01e-42	0.930062	0.451	0.155	1.42e-38	5	HMJ22-RS21890
HMJ22-RS12910	4.02e-42	0.877592	0.263	0.06	1.9e-38	5	HMJ22-RS12910
HMJ22-RS01135	4.33e-42	1.05292	0.278	0.067	2.05e-38	5	HMJ22-RS01135
HMJ22-RS15515	1.55e-41	0.987866	0.322	0.087	7.34e-38	5	HMJ22-RS15515
HMJ22-RS03235	2.47e-41	1.04359	0.253	0.057	1.17e-37	5	HMJ22-RS03235
HMJ22-RS08095	4.8e-41	0.820413	0.418	0.135	2.27e-37	5	HMJ22-RS08095
HMJ22-RS20755	1.23e-40	0.989799	0.284	0.071	5.83e-37	5	HMJ22-RS20755
HMJ22-RS19630.2	1.06e-39	0.865338	0.504	0.188	5.01e-36	5	HMJ22-RS19630
HMJ22-RS07350	2.75e-39	0.880675	0.258	0.061	1.3e-35	5	HMJ22-RS07350
HMJ22-RS14315	3.17e-39	0.990936	0.258	0.062	1.5e-35	5	HMJ22-RS14315
HMJ22-RS07245	1.2e-38	0.914866	0.367	0.115	5.66e-35	5	HMJ22-RS07245
HMJ22-RS21215	1.87e-38	0.961172	0.278	0.072	8.83e-35	5	HMJ22-RS21215
HMJ22-RS24400	2.44e-38	0.806088	0.4	0.132	1.15e-34	5	HMJ22-RS24400
HMJ22-RS14445	2.03e-37	0.907638	0.342	0.105	9.62e-34	5	HMJ22-RS14445
HMJ22-RS08045	2.09e-37	0.822118	0.301	0.083	9.91e-34	5	HMJ22-RS08045
HMJ22-RS24010	2.12e-37	0.895769	0.268	0.068	1e-33	5	HMJ22-RS24010
HMJ22-RS02880.2	2.81e-37	0.895333	0.473	0.179	1.33e-33	5	HMJ22-RS02880
HMJ22-RS00500	2.91e-37	0.812317	0.306	0.086	1.38e-33	5	HMJ22-RS00500
HMJ22-RS03285	6.75e-37	0.851906	0.671	0.316	3.2e-33	5	HMJ22-RS03285
HMJ22-RS21025	1.09e-36	0.920988	0.392	0.134	5.17e-33	5	HMJ22-RS21025
HMJ22-RS19635	6.19e-36	0.978669	0.273	0.074	2.93e-32	5	HMJ22-RS19635
HMJ22-RS08805	6.56e-36	0.842243	0.319	0.094	3.1e-32	5	HMJ22-RS08805
HMJ22-RS21900	1.46e-34	0.777498	0.481	0.19	6.91e-31	5	HMJ22-RS21900
HMJ22-RS17815	8.82e-34	0.932085	0.263	0.072	4.18e-30	5	HMJ22-RS17815
HMJ22-RS12470	1.26e-32	0.809486	0.304	0.093	5.95e-29	5	HMJ22-RS12470
HMJ22-RS16860	2.58e-32	0.75908	0.268	0.075	1.22e-28	5	HMJ22-RS16860
HMJ22-RS23670.5	5.62e-32	-0.559373	0.987	0.954	2.66e-28	5	HMJ22-RS23670
HMJ22-RS00655	8.03e-32	0.739339	0.286	0.085	3.8e-28	5	HMJ22-RS00655
HMJ22-RS18885	1.48e-31	0.845909	0.354	0.124	7.02e-28	5	HMJ22-RS18885
HMJ22-RS23005	6.9e-31	0.639762	0.765	0.405	3.26e-27	5	HMJ22-RS23005
HMJ22-RS02200	3.31e-30	0.705062	0.595	0.281	1.57e-26	5	HMJ22-RS02200
HMJ22-RS03160	3.89e-30	0.728983	0.332	0.112	1.84e-26	5	HMJ22-RS03160
HMJ22-RS08010	1.39e-29	0.686396	0.332	0.112	6.56e-26	5	HMJ22-RS08010
HMJ22-RS17320	1.67e-29	0.616244	0.251	0.072	7.9e-26	5	HMJ22-RS17320
HMJ22-RS04785.3	1.94e-29	-1.40876	0.519	0.634	9.17e-26	5	HMJ22-RS04785
HMJ22-RS23665	4.04e-29	0.754564	0.299	0.097	1.91e-25	5	HMJ22-RS23665
HMJ22-RS00630.1	6.14e-29	0.665774	0.651	0.324	2.91e-25	5	HMJ22-RS00630
HMJ22-RS19675.1	1.44e-28	0.624742	0.691	0.37	6.82e-25	5	HMJ22-RS19675
HMJ22-RS01735	6.1e-28	0.751557	0.258	0.079	2.89e-24	5	HMJ22-RS01735
HMJ22-RS21720.1	6.74e-28	0.719807	0.478	0.207	3.19e-24	5	HMJ22-RS21720
HMJ22-RS07405	7.59e-28	0.72529	0.309	0.106	3.59e-24	5	HMJ22-RS07405
HMJ22-RS23545	1.84e-27	0.595457	0.403	0.159	8.72e-24	5	HMJ22-RS23545
HMJ22-RS22860.2	2e-27	0.577671	0.435	0.174	9.47e-24	5	HMJ22-RS22860
HMJ22-RS21855	1.22e-26	0.762876	0.339	0.126	5.76e-23	5	HMJ22-RS21855
HMJ22-RS07770	5.92e-26	0.610387	0.339	0.126	2.8e-22	5	HMJ22-RS07770
HMJ22-RS05560.5	9.62e-26	0.519851	0.957	0.676	4.55e-22	5	HMJ22-RS05560
HMJ22-RS22035	9.63e-26	0.632378	0.471	0.208	4.56e-22	5	HMJ22-RS22035
HMJ22-RS01870	1.14e-25	0.664027	0.365	0.143	5.39e-22	5	HMJ22-RS01870
HMJ22-RS09925	4.76e-25	0.518362	0.251	0.079	2.26e-21	5	HMJ22-RS09925
HMJ22-RS21825.1	5.19e-25	0.560426	0.623	0.318	2.46e-21	5	HMJ22-RS21825
HMJ22-RS05410.4	2.52e-24	0.527821	0.618	0.309	1.19e-20	5	HMJ22-RS05410
HMJ22-RS08835.1	2.71e-24	0.581261	0.587	0.288	1.28e-20	5	HMJ22-RS08835
HMJ22-RS03685	2.71e-24	0.59859	0.281	0.098	1.28e-20	5	HMJ22-RS03685
HMJ22-RS07360	3.21e-24	0.532498	0.43	0.185	1.52e-20	5	HMJ22-RS07360
HMJ22-RS21505	5.96e-24	0.746965	0.304	0.114	2.82e-20	5	HMJ22-RS21505
HMJ22-RS21820	9.07e-24	0.709503	0.332	0.13	4.29e-20	5	HMJ22-RS21820
HMJ22-RS16410	1.16e-23	0.601923	0.367	0.15	5.49e-20	5	HMJ22-RS16410
HMJ22-RS09000	2.86e-23	0.582658	0.818	0.516	1.36e-19	5	HMJ22-RS09000
HMJ22-RS21270	3.67e-23	0.518108	0.349	0.138	1.74e-19	5	HMJ22-RS21270
HMJ22-RS19665.3	6.99e-23	0.536123	0.772	0.449	3.31e-19	5	HMJ22-RS19665
HMJ22-RS21600	1.49e-22	0.590228	0.408	0.179	7.05e-19	5	HMJ22-RS21600
HMJ22-RS19815.3	1.85e-22	0.437761	0.567	0.279	8.77e-19	5	HMJ22-RS19815
HMJ22-RS03935	2.14e-22	0.589752	0.263	0.092	1.01e-18	5	HMJ22-RS03935
HMJ22-RS22420	2.3e-22	0.52783	0.306	0.116	1.09e-18	5	HMJ22-RS22420
HMJ22-RS03075	2.55e-22	0.4769	0.6	0.308	1.21e-18	5	HMJ22-RS03075
HMJ22-RS03170	2.59e-22	0.601232	0.309	0.12	1.22e-18	5	HMJ22-RS03170
HMJ22-RS01745	4.93e-22	0.623643	0.286	0.106	2.33e-18	5	HMJ22-RS01745
HMJ22-RS22175	7.56e-22	0.483624	0.463	0.215	3.58e-18	5	HMJ22-RS22175
HMJ22-RS20550	8.14e-22	0.457258	0.567	0.282	3.85e-18	5	HMJ22-RS20550
HMJ22-RS23310	1.24e-21	0.466287	0.559	0.287	5.89e-18	5	HMJ22-RS23310
HMJ22-RS18335	2.3e-21	0.601734	0.261	0.094	1.09e-17	5	HMJ22-RS18335
HMJ22-RS21875	2.44e-21	0.55062	0.423	0.193	1.16e-17	5	HMJ22-RS21875
HMJ22-RS05620.1	2.86e-21	0.462911	0.347	0.143	1.36e-17	5	HMJ22-RS05620
HMJ22-RS10325	3.12e-21	0.655509	0.271	0.1	1.48e-17	5	HMJ22-RS10325
HMJ22-RS07445	4.05e-21	0.49792	0.486	0.233	1.92e-17	5	HMJ22-RS07445
HMJ22-RS20080.1	5.03e-21	0.583225	0.289	0.11	2.38e-17	5	HMJ22-RS20080
HMJ22-RS16170.1	5.2e-21	0.548964	0.395	0.177	2.46e-17	5	HMJ22-RS16170
HMJ22-RS20935	1.03e-20	0.455102	0.377	0.163	4.86e-17	5	HMJ22-RS20935
HMJ22-RS21520	1.06e-20	0.499293	0.304	0.119	5.03e-17	5	HMJ22-RS21520
HMJ22-RS13510.2	1.31e-20	0.521465	0.696	0.408	6.22e-17	5	HMJ22-RS13510
HMJ22-RS21840.1	2.44e-20	0.542366	0.403	0.184	1.16e-16	5	HMJ22-RS21840
HMJ22-RS19070.1	2.49e-20	0.489373	0.456	0.216	1.18e-16	5	HMJ22-RS19070
HMJ22-RS19475	2.73e-20	0.524495	0.281	0.108	1.29e-16	5	HMJ22-RS19475
HMJ22-RS08120.3	3.05e-20	-0.3853	0.99	0.973	1.45e-16	5	HMJ22-RS08120
HMJ22-RS08895	3.5e-20	0.389529	0.471	0.222	1.66e-16	5	HMJ22-RS08895
HMJ22-RS10380	3.75e-20	0.450231	0.448	0.211	1.78e-16	5	HMJ22-RS10380
HMJ22-RS19085	4.73e-20	0.520039	0.339	0.144	2.24e-16	5	HMJ22-RS19085
HMJ22-RS10150.3	7.49e-20	0.463352	0.453	0.216	3.54e-16	5	HMJ22-RS10150
HMJ22-RS23855	7.54e-20	0.401927	0.281	0.108	3.57e-16	5	HMJ22-RS23855
HMJ22-RS21880	8.72e-20	0.5045	0.261	0.097	4.13e-16	5	HMJ22-RS21880
HMJ22-RS10165.1	1.33e-19	0.36424	0.433	0.199	6.3e-16	5	HMJ22-RS10165
HMJ22-RS18945	2.06e-19	0.533931	0.316	0.131	9.75e-16	5	HMJ22-RS18945
HMJ22-RS03010.3	2.93e-19	0.461114	0.658	0.368	1.39e-15	5	HMJ22-RS03010
HMJ22-RS09585	2.98e-19	0.501588	0.263	0.101	1.41e-15	5	HMJ22-RS09585
HMJ22-RS08215.3	3.94e-19	0.44589	0.737	0.42	1.86e-15	5	HMJ22-RS08215
HMJ22-RS16320.1	4.09e-19	0.429681	0.484	0.236	1.94e-15	5	HMJ22-RS16320
HMJ22-RS02905.1	4.98e-19	0.426943	0.577	0.304	2.36e-15	5	HMJ22-RS02905
HMJ22-RS21985.2	5.12e-19	0.497326	0.592	0.321	2.43e-15	5	HMJ22-RS21985
HMJ22-RS21970	6.25e-19	0.367808	0.549	0.285	2.96e-15	5	HMJ22-RS21970
HMJ22-RS04200	1.61e-18	0.497303	0.266	0.104	7.61e-15	5	HMJ22-RS04200
HMJ22-RS20910	2.58e-18	0.400165	0.258	0.1	1.22e-14	5	HMJ22-RS20910
HMJ22-RS10960	3.16e-18	0.34429	0.466	0.229	1.49e-14	5	HMJ22-RS10960
HMJ22-RS17005.2	3.22e-18	0.466859	0.643	0.362	1.52e-14	5	HMJ22-RS17005
HMJ22-RS05490	3.33e-18	0.479889	0.451	0.223	1.58e-14	5	HMJ22-RS05490
HMJ22-RS21260	4.2e-18	0.3388	0.354	0.157	1.99e-14	5	HMJ22-RS21260
HMJ22-RS05645.3	6.39e-18	0.415056	0.463	0.23	3.03e-14	5	HMJ22-RS05645
HMJ22-RS22905.1	7.57e-18	0.3986	0.673	0.385	3.59e-14	5	HMJ22-RS22905
HMJ22-RS16270	9.26e-18	0.399045	0.418	0.201	4.38e-14	5	HMJ22-RS16270
HMJ22-RS08830	1.3e-17	0.468138	0.418	0.204	6.15e-14	5	HMJ22-RS08830
HMJ22-RS02875	1.62e-17	0.472685	0.352	0.159	7.65e-14	5	HMJ22-RS02875
HMJ22-RS12870	1.63e-17	0.478806	0.271	0.11	7.7e-14	5	HMJ22-RS12870
HMJ22-RS12185.1	2.21e-17	0.415005	0.478	0.244	1.04e-13	5	HMJ22-RS12185
HMJ22-RS23705.1	2.44e-17	0.396912	0.319	0.14	1.15e-13	5	HMJ22-RS23705
HMJ22-RS08815.2	2.83e-17	0.351407	0.471	0.235	1.34e-13	5	HMJ22-RS08815
HMJ22-RS21780	3.82e-17	0.373328	0.258	0.103	1.81e-13	5	HMJ22-RS21780
HMJ22-RS08335	3.94e-17	0.357549	0.251	0.099	1.87e-13	5	HMJ22-RS08335
HMJ22-RS00810.5	8.15e-17	-0.544303	0.982	0.917	3.86e-13	5	HMJ22-RS00810
HMJ22-RS21725	1.86e-16	0.403492	0.365	0.17	8.81e-13	5	HMJ22-RS21725
HMJ22-RS04685.4	3.68e-16	0.414401	0.676	0.4	1.74e-12	5	HMJ22-RS04685
HMJ22-RS09625.5	4.2e-16	0.3382	0.8	0.486	1.99e-12	5	HMJ22-RS09625
HMJ22-RS01595.1	4.68e-16	0.394841	0.294	0.127	2.21e-12	5	HMJ22-RS01595
HMJ22-RS12840.2	4.86e-16	0.366298	0.446	0.227	2.3e-12	5	HMJ22-RS12840
HMJ22-RS07500	5.9e-16	0.370984	0.537	0.288	2.79e-12	5	HMJ22-RS07500
HMJ22-RS07435.1	8.18e-16	0.318565	0.471	0.241	3.87e-12	5	HMJ22-RS07435
HMJ22-RS20905.2	1.12e-15	0.322333	0.658	0.375	5.28e-12	5	HMJ22-RS20905
HMJ22-RS24585	1.26e-15	0.382122	0.496	0.264	5.95e-12	5	HMJ22-RS24585
HMJ22-RS01120.1	1.36e-15	0.27282	0.438	0.22	6.42e-12	5	HMJ22-RS01120
HMJ22-RS20075	1.73e-15	0.382049	0.808	0.521	8.19e-12	5	HMJ22-RS20075
HMJ22-RS01665.1	2.21e-15	0.330629	0.425	0.215	1.04e-11	5	HMJ22-RS01665
HMJ22-RS08860	2.25e-15	0.367909	0.663	0.395	1.06e-11	5	HMJ22-RS08860
HMJ22-RS12710.1	2.28e-15	0.361611	0.284	0.123	1.08e-11	5	HMJ22-RS12710
HMJ22-RS21835.5	4.07e-15	0.409031	0.542	0.302	1.93e-11	5	HMJ22-RS21835
HMJ22-RS02865.2	4.45e-15	0.358952	0.547	0.305	2.11e-11	5	HMJ22-RS02865
HMJ22-RS00200	5.17e-15	0.300648	0.403	0.199	2.45e-11	5	HMJ22-RS00200
HMJ22-RS21980.1	6.59e-15	0.339077	0.37	0.181	3.12e-11	5	HMJ22-RS21980
HMJ22-RS07455	9.03e-15	0.393722	0.322	0.152	4.28e-11	5	HMJ22-RS07455
HMJ22-RS10535.1	1.19e-14	0.35971	0.435	0.225	5.61e-11	5	HMJ22-RS10535
HMJ22-RS01925.1	1.6e-14	0.305968	0.349	0.167	7.59e-11	5	HMJ22-RS01925
HMJ22-RS14600.1	2.02e-14	0.376827	0.284	0.129	9.57e-11	5	HMJ22-RS14600
HMJ22-RS17995.1	2.13e-14	0.383955	0.276	0.124	1.01e-10	5	HMJ22-RS17995
HMJ22-RS05330	2.35e-14	0.360623	0.344	0.167	1.11e-10	5	HMJ22-RS05330
HMJ22-RS23380	2.63e-14	0.387848	0.258	0.113	1.24e-10	5	HMJ22-RS23380
HMJ22-RS06860	3e-14	0.278209	0.403	0.207	1.42e-10	5	HMJ22-RS06860
HMJ22-RS22110	3.27e-14	0.341737	0.271	0.121	1.55e-10	5	HMJ22-RS22110
HMJ22-RS12740	3.69e-14	-1.35354	0.354	0.468	1.75e-10	5	HMJ22-RS12740
HMJ22-RS22545	4.79e-14	-1.24859	0.486	0.547	2.27e-10	5	HMJ22-RS22545
HMJ22-RS20065	6.38e-14	0.297806	0.377	0.19	3.02e-10	5	HMJ22-RS20065
HMJ22-RS16935.3	6.42e-14	0.307553	0.625	0.368	3.04e-10	5	HMJ22-RS16935
HMJ22-RS07380	7.6e-14	0.358077	0.62	0.371	3.6e-10	5	HMJ22-RS07380
HMJ22-RS12195	8.51e-14	0.267028	0.359	0.178	4.03e-10	5	HMJ22-RS12195
HMJ22-RS21830.1	1.22e-13	0.274099	0.496	0.274	5.8e-10	5	HMJ22-RS21830
HMJ22-RS05955	1.33e-13	0.340767	0.258	0.115	6.29e-10	5	HMJ22-RS05955
HMJ22-RS23605	2.36e-13	0.300415	0.258	0.115	1.12e-09	5	HMJ22-RS23605
HMJ22-RS11480.1	2.45e-13	0.447403	0.362	0.185	1.16e-09	5	HMJ22-RS11480
HMJ22-RS14295	4.09e-13	0.366055	0.268	0.123	1.93e-09	5	HMJ22-RS14295
HMJ22-RS05405	4.43e-13	0.368387	0.861	0.617	2.1e-09	5	HMJ22-RS05405
HMJ22-RS18930	5.95e-13	0.336073	0.278	0.13	2.82e-09	5	HMJ22-RS18930
HMJ22-RS23000.1	6.19e-13	0.267577	0.337	0.169	2.93e-09	5	HMJ22-RS23000
HMJ22-RS01610	6.28e-13	0.328546	0.327	0.163	2.97e-09	5	HMJ22-RS01610
HMJ22-RS07370	1.37e-12	0.301111	0.332	0.167	6.47e-09	5	HMJ22-RS07370
HMJ22-RS19965.1	1.54e-12	0.339579	0.296	0.145	7.3e-09	5	HMJ22-RS19965
HMJ22-RS12885.1	2.57e-12	0.269072	0.478	0.27	1.22e-08	5	HMJ22-RS12885
HMJ22-RS07060.2	4.36e-12	-0.590641	0.808	0.746	2.06e-08	5	HMJ22-RS07060
HMJ22-RS07430	6.63e-12	0.264388	0.337	0.175	3.14e-08	5	HMJ22-RS07430
HMJ22-RS07980	7.19e-12	-0.346898	0.972	0.918	3.4e-08	5	HMJ22-RS07980
HMJ22-RS06850.5	1.32e-11	-0.530225	0.899	0.786	6.26e-08	5	HMJ22-RS06850
HMJ22-RS11235	3.51e-11	0.331733	0.266	0.131	1.66e-07	5	HMJ22-RS11235
HMJ22-RS23990	3.67e-11	0.280175	0.271	0.134	1.74e-07	5	HMJ22-RS23990
HMJ22-RS10440	1.37e-10	0.263626	0.314	0.167	6.5e-07	5	HMJ22-RS10440
HMJ22-RS04790.5	2.07e-10	-0.547376	0.815	0.731	9.79e-07	5	HMJ22-RS04790
HMJ22-RS03785	3.26e-10	0.250565	0.273	0.139	1.54e-06	5	HMJ22-RS03785
HMJ22-RS02140.2	9.18e-10	-1.1251	0.382	0.459	4.34e-06	5	HMJ22-RS02140
HMJ22-RS13055	1.7e-08	-0.550252	0.823	0.705	8.04e-05	5	HMJ22-RS13055
HMJ22-RS02735.2	1.21e-05	-1.28774	0.185	0.26	0.0574386	5	HMJ22-RS02735
HMJ22-RS06190.1	1.98e-05	-1.25426	0.218	0.287	0.0936113	5	HMJ22-RS06190
HMJ22-RS05365	4.35e-05	-0.330774	0.871	0.78	0.205731	5	HMJ22-RS05365
HMJ22-RS24380	7.85e-05	-0.643103	0.58	0.537	0.371722	5	HMJ22-RS24380
HMJ22-RS22340.1	0.000241332	-1.00704	0.306	0.347	1	5	HMJ22-RS22340
HMJ22-RS05435	0.000659968	-0.286252	0.866	0.748	1	5	HMJ22-RS05435
HMJ22-RS04855.1	0.000678797	-0.860797	0.38	0.398	1	5	HMJ22-RS04855
HMJ22-RS01510	0.00133097	-0.925471	0.299	0.333	1	5	HMJ22-RS01510
HMJ22-RS06495.4	0.00196655	-0.313316	0.392	0.267	1	5	HMJ22-RS06495
HMJ22-RS12715.4	0.0035898	-0.277385	0.392	0.271	1	5	HMJ22-RS12715
HMJ22-RS10220	0.0042561	-0.311181	0.38	0.265	1	5	HMJ22-RS10220
HMJ22-RS03700.3	0.00459808	-0.296224	0.365	0.254	1	5	HMJ22-RS03700
HMJ22-RS10180	0.00496297	-0.266531	0.299	0.21	1	5	HMJ22-RS10180
HMJ22-RS23920	2.16e-74	1.17901	0.387	0.056	1.02e-70	6	HMJ22-RS23920
HMJ22-RS03450	1.86e-63	1.10632	0.421	0.078	8.78e-60	6	HMJ22-RS03450
HMJ22-RS19045	1.82e-62	1.14498	0.372	0.063	8.63e-59	6	HMJ22-RS19045
HMJ22-RS03455.1	5.51e-62	1.12439	0.49	0.103	2.61e-58	6	HMJ22-RS03455
HMJ22-RS00810.6	1.05e-61	0.727965	1	0.918	4.99e-58	6	HMJ22-RS00810
HMJ22-RS22860.3	5.73e-57	1.07843	0.621	0.171	2.71e-53	6	HMJ22-RS22860
HMJ22-RS07650.4	5.14e-51	0.85721	0.966	0.431	2.43e-47	6	HMJ22-RS07650
HMJ22-RS21250	1.01e-45	0.948635	0.456	0.117	4.79e-42	6	HMJ22-RS21250
HMJ22-RS08120.4	7.26e-45	0.490194	1	0.973	3.44e-41	6	HMJ22-RS08120
HMJ22-RS07440.5	4.11e-43	0.609202	1	0.85	1.94e-39	6	HMJ22-RS07440
HMJ22-RS16170.2	4.43e-42	0.665045	0.575	0.172	2.1e-38	6	HMJ22-RS16170
HMJ22-RS13985.4	5.83e-41	0.796115	0.625	0.21	2.76e-37	6	HMJ22-RS13985
HMJ22-RS17620	4.11e-40	0.676506	0.51	0.149	1.94e-36	6	HMJ22-RS17620
HMJ22-RS02890.1	6.42e-40	0.812178	0.498	0.146	3.04e-36	6	HMJ22-RS02890
HMJ22-RS22760	1.31e-39	0.815319	0.272	0.052	6.22e-36	6	HMJ22-RS22760
HMJ22-RS13615.1	7.1e-39	0.683101	0.502	0.148	3.36e-35	6	HMJ22-RS13615
HMJ22-RS22765	1.42e-38	0.772776	0.391	0.101	6.71e-35	6	HMJ22-RS22765
HMJ22-RS22855	2.96e-38	0.832589	0.337	0.078	1.4e-34	6	HMJ22-RS22855
HMJ22-RS23890.5	2.18e-37	0.721891	0.644	0.226	1.03e-33	6	HMJ22-RS23890
HMJ22-RS12300	2.47e-37	0.928004	0.28	0.058	1.17e-33	6	HMJ22-RS12300
HMJ22-RS12925	2.06e-36	0.71364	0.276	0.057	9.75e-33	6	HMJ22-RS12925
HMJ22-RS15825	2.6e-36	0.759721	0.257	0.05	1.23e-32	6	HMJ22-RS15825
HMJ22-RS09625.6	9.58e-36	0.726554	0.946	0.487	4.54e-32	6	HMJ22-RS09625
HMJ22-RS12730.1	1.85e-35	0.705293	0.437	0.126	8.74e-32	6	HMJ22-RS12730
HMJ22-RS10855	1.98e-35	0.690335	0.337	0.083	9.35e-32	6	HMJ22-RS10855
HMJ22-RS00125.1	3.01e-35	0.650996	0.444	0.13	1.42e-31	6	HMJ22-RS00125
HMJ22-RS11510	6.86e-35	0.665061	0.345	0.087	3.25e-31	6	HMJ22-RS11510
HMJ22-RS01180.4	1.44e-34	0.71399	0.95	0.501	6.83e-31	6	HMJ22-RS01180
HMJ22-RS03855	3.43e-34	0.775548	0.268	0.057	1.63e-30	6	HMJ22-RS03855
HMJ22-RS02885	4.12e-34	0.71277	0.345	0.088	1.95e-30	6	HMJ22-RS02885
HMJ22-RS08475	6.21e-34	0.755188	0.28	0.062	2.94e-30	6	HMJ22-RS08475
HMJ22-RS02735.3	1.26e-33	0.596322	0.628	0.224	5.96e-30	6	HMJ22-RS02735
HMJ22-RS15520.3	3.99e-33	0.645176	0.582	0.205	1.89e-29	6	HMJ22-RS15520
HMJ22-RS03500	6.74e-33	0.754803	0.318	0.079	3.19e-29	6	HMJ22-RS03500
HMJ22-RS11540	8.7e-33	0.582844	0.418	0.124	4.12e-29	6	HMJ22-RS11540
HMJ22-RS12175.3	1.05e-32	0.570862	0.747	0.295	4.96e-29	6	HMJ22-RS12175
HMJ22-RS03165	6.6e-32	0.648882	0.31	0.078	3.13e-28	6	HMJ22-RS03165
HMJ22-RS15525.4	6.95e-32	0.717349	0.816	0.368	3.29e-28	6	HMJ22-RS15525
HMJ22-RS05560.6	2.07e-31	0.621586	0.996	0.684	9.78e-28	6	HMJ22-RS05560
HMJ22-RS03875.1	2.47e-31	0.545823	0.483	0.158	1.17e-27	6	HMJ22-RS03875
HMJ22-RS13915	4.14e-31	0.553644	0.471	0.152	1.96e-27	6	HMJ22-RS13915
HMJ22-RS08245.3	4.58e-31	0.371596	1	0.981	2.17e-27	6	HMJ22-RS08245
HMJ22-RS07940.2	4.96e-31	0.624307	0.54	0.19	2.35e-27	6	HMJ22-RS07940
HMJ22-RS16255.3	1.22e-29	0.62996	0.567	0.21	5.76e-26	6	HMJ22-RS16255
HMJ22-RS09350	1.46e-29	0.595723	0.28	0.069	6.9e-26	6	HMJ22-RS09350
HMJ22-RS15440	2.34e-29	0.582862	0.398	0.123	1.11e-25	6	HMJ22-RS15440
HMJ22-RS07385.1	5.36e-29	0.468873	0.51	0.175	2.54e-25	6	HMJ22-RS07385
HMJ22-RS21850.4	1.27e-28	0.537617	0.839	0.369	5.99e-25	6	HMJ22-RS21850
HMJ22-RS13835	1.96e-28	0.713201	0.28	0.072	9.28e-25	6	HMJ22-RS13835
HMJ22-RS21235	3.95e-28	0.543005	0.356	0.106	1.87e-24	6	HMJ22-RS21235
HMJ22-RS17010.3	6.35e-28	0.45331	0.759	0.31	3.01e-24	6	HMJ22-RS17010
HMJ22-RS20860	7.29e-28	0.63322	0.352	0.105	3.45e-24	6	HMJ22-RS20860
HMJ22-RS18880	1.12e-27	0.548979	0.268	0.067	5.31e-24	6	HMJ22-RS18880
HMJ22-RS00495	1.51e-27	0.583169	0.314	0.087	7.15e-24	6	HMJ22-RS00495
HMJ22-RS01805	1.84e-27	0.576981	0.287	0.076	8.7e-24	6	HMJ22-RS01805
HMJ22-RS16225	2.2e-27	0.467108	0.421	0.136	1.04e-23	6	HMJ22-RS16225
HMJ22-RS01495	3.85e-27	0.598292	0.257	0.064	1.82e-23	6	HMJ22-RS01495
HMJ22-RS07815.2	5.27e-27	0.471891	0.49	0.175	2.5e-23	6	HMJ22-RS07815
HMJ22-RS10060	1.03e-26	0.531469	0.352	0.107	4.88e-23	6	HMJ22-RS10060
HMJ22-RS19025	2.83e-26	0.46067	0.28	0.074	1.34e-22	6	HMJ22-RS19025
HMJ22-RS08020	6.29e-26	0.49912	0.444	0.154	2.98e-22	6	HMJ22-RS08020
HMJ22-RS01110	6.72e-26	0.553888	0.387	0.126	3.18e-22	6	HMJ22-RS01110
HMJ22-RS22870	6.85e-26	0.589951	0.314	0.091	3.24e-22	6	HMJ22-RS22870
HMJ22-RS00405	9.83e-26	0.560665	0.318	0.093	4.66e-22	6	HMJ22-RS00405
HMJ22-RS05040	1.26e-25	0.670902	0.276	0.075	5.98e-22	6	HMJ22-RS05040
HMJ22-RS20930	1.46e-25	0.501114	0.28	0.076	6.92e-22	6	HMJ22-RS20930
HMJ22-RS15515.1	3e-25	0.494369	0.322	0.096	1.42e-21	6	HMJ22-RS15515
HMJ22-RS17740	1.17e-24	0.54876	0.284	0.08	5.54e-21	6	HMJ22-RS17740
HMJ22-RS23495	3.53e-24	0.501706	0.421	0.15	1.67e-20	6	HMJ22-RS23495
HMJ22-RS20625	4.18e-24	0.590708	0.261	0.072	1.98e-20	6	HMJ22-RS20625
HMJ22-RS11425	5.54e-24	0.478066	0.28	0.079	2.62e-20	6	HMJ22-RS11425
HMJ22-RS15105.2	9.54e-24	0.475139	0.602	0.249	4.52e-20	6	HMJ22-RS15105
HMJ22-RS05815	9.89e-24	0.352411	0.356	0.115	4.68e-20	6	HMJ22-RS05815
HMJ22-RS10310	1.02e-23	0.602398	0.287	0.084	4.84e-20	6	HMJ22-RS10310
HMJ22-RS03420.3	1.03e-23	0.311193	0.716	0.298	4.88e-20	6	HMJ22-RS03420
HMJ22-RS24930	1.23e-23	0.561223	0.383	0.133	5.85e-20	6	HMJ22-RS24930
HMJ22-RS05710	1.47e-23	0.446792	0.598	0.244	6.95e-20	6	HMJ22-RS05710
HMJ22-RS11480.2	3.1e-23	0.420295	0.483	0.183	1.47e-19	6	HMJ22-RS11480
HMJ22-RS21350.3	4.41e-23	0.399637	0.575	0.233	2.09e-19	6	HMJ22-RS21350
HMJ22-RS15900.2	9.36e-23	0.438316	0.659	0.288	4.43e-19	6	HMJ22-RS15900
HMJ22-RS09860	9.91e-23	0.430836	0.456	0.17	4.69e-19	6	HMJ22-RS09860
HMJ22-RS05385	1.72e-22	0.525873	0.322	0.103	8.12e-19	6	HMJ22-RS05385
HMJ22-RS03275.1	2.71e-22	0.306344	0.452	0.168	1.28e-18	6	HMJ22-RS03275
HMJ22-RS02960	3.13e-22	0.419804	0.307	0.096	1.48e-18	6	HMJ22-RS02960
HMJ22-RS08000	3.25e-22	0.290553	0.398	0.14	1.54e-18	6	HMJ22-RS08000
HMJ22-RS03230	3.29e-22	0.395944	0.307	0.095	1.56e-18	6	HMJ22-RS03230
HMJ22-RS15970	4.52e-22	0.441777	0.383	0.136	2.14e-18	6	HMJ22-RS15970
HMJ22-RS18425	4.69e-22	0.546235	0.272	0.081	2.22e-18	6	HMJ22-RS18425
HMJ22-RS14590.1	4.71e-22	0.318008	0.437	0.161	2.23e-18	6	HMJ22-RS14590
HMJ22-RS07800.3	5.06e-22	0.485483	0.862	0.437	2.4e-18	6	HMJ22-RS07800
HMJ22-RS16860.1	5.18e-22	0.466239	0.276	0.082	2.45e-18	6	HMJ22-RS16860
HMJ22-RS13230	6.39e-22	0.401885	0.291	0.089	3.03e-18	6	HMJ22-RS13230
HMJ22-RS07960	1.05e-21	0.336745	0.379	0.133	4.98e-18	6	HMJ22-RS07960
HMJ22-RS02155.1	1.4e-21	0.332969	0.402	0.144	6.63e-18	6	HMJ22-RS02155
HMJ22-RS00855	1.44e-21	0.293314	0.387	0.137	6.83e-18	6	HMJ22-RS00855
HMJ22-RS06160	1.76e-21	0.466216	0.303	0.096	8.35e-18	6	HMJ22-RS06160
HMJ22-RS10560.1	2.03e-21	0.520308	0.452	0.177	9.6e-18	6	HMJ22-RS10560
HMJ22-RS13120.2	2.2e-21	0.407049	0.766	0.354	1.04e-17	6	HMJ22-RS13120
HMJ22-RS21835.6	2.59e-21	0.454241	0.67	0.301	1.23e-17	6	HMJ22-RS21835
HMJ22-RS22995.4	2.84e-21	0.420274	0.774	0.363	1.34e-17	6	HMJ22-RS22995
HMJ22-RS21905	3.09e-21	0.455326	0.257	0.075	1.46e-17	6	HMJ22-RS21905
HMJ22-RS03700.4	3.38e-21	0.373116	0.575	0.242	1.6e-17	6	HMJ22-RS03700
HMJ22-RS09940	3.59e-21	0.443533	0.333	0.113	1.7e-17	6	HMJ22-RS09940
HMJ22-RS03770.1	3.63e-21	0.424775	0.414	0.154	1.72e-17	6	HMJ22-RS03770
HMJ22-RS08780.1	3.84e-21	0.257538	0.54	0.217	1.82e-17	6	HMJ22-RS08780
HMJ22-RS24875	4.08e-21	0.329085	0.291	0.091	1.93e-17	6	HMJ22-RS24875
HMJ22-RS02085	4.75e-21	0.496171	0.36	0.128	2.25e-17	6	HMJ22-RS02085
HMJ22-RS08760	7.45e-21	0.524263	0.291	0.093	3.53e-17	6	HMJ22-RS08760
HMJ22-RS03200	9.01e-21	0.48185	0.257	0.075	4.27e-17	6	HMJ22-RS03200
HMJ22-RS21920.2	1.94e-20	0.490658	0.544	0.236	9.16e-17	6	HMJ22-RS21920
HMJ22-RS19625.4	1.99e-20	0.3231	0.632	0.27	9.42e-17	6	HMJ22-RS19625
HMJ22-RS13480.1	2.23e-20	0.347199	0.402	0.15	1.06e-16	6	HMJ22-RS13480
HMJ22-RS24340	2.79e-20	0.464702	0.31	0.104	1.32e-16	6	HMJ22-RS24340
HMJ22-RS10565	2.93e-20	0.354141	0.287	0.091	1.39e-16	6	HMJ22-RS10565
HMJ22-RS01675	4.25e-20	0.588682	0.272	0.087	2.01e-16	6	HMJ22-RS01675
HMJ22-RS14370	4.47e-20	0.341641	0.521	0.217	2.12e-16	6	HMJ22-RS14370
HMJ22-RS04730.3	4.5e-20	0.498763	0.897	0.491	2.13e-16	6	HMJ22-RS04730
HMJ22-RS03650	6.13e-20	0.339577	0.314	0.106	2.9e-16	6	HMJ22-RS03650
HMJ22-RS01320	7.04e-20	0.46369	0.322	0.112	3.33e-16	6	HMJ22-RS01320
HMJ22-RS04540	8.26e-20	0.30519	0.536	0.224	3.91e-16	6	HMJ22-RS04540
HMJ22-RS02880.3	1.53e-19	0.308637	0.471	0.19	7.24e-16	6	HMJ22-RS02880
HMJ22-RS16095.2	1.81e-19	0.450228	0.793	0.398	8.56e-16	6	HMJ22-RS16095
HMJ22-RS10530	2.48e-19	0.363943	0.333	0.118	1.17e-15	6	HMJ22-RS10530
HMJ22-RS19815.4	2.54e-19	0.256746	0.644	0.284	1.2e-15	6	HMJ22-RS19815
HMJ22-RS11475.1	2.64e-19	0.397199	0.314	0.108	1.25e-15	6	HMJ22-RS11475
HMJ22-RS04950	2.75e-19	0.422514	0.257	0.08	1.3e-15	6	HMJ22-RS04950
HMJ22-RS05235	6.22e-19	0.356664	0.64	0.288	2.94e-15	6	HMJ22-RS05235
HMJ22-RS23990.1	6.77e-19	0.378134	0.36	0.133	3.21e-15	6	HMJ22-RS23990
HMJ22-RS03010.4	7.78e-19	0.374467	0.77	0.371	3.68e-15	6	HMJ22-RS03010
HMJ22-RS00445	9.78e-19	0.308777	0.464	0.19	4.63e-15	6	HMJ22-RS00445
HMJ22-RS17575	1.53e-18	0.273502	0.406	0.158	7.23e-15	6	HMJ22-RS17575
HMJ22-RS00545	1.82e-18	0.319881	0.46	0.188	8.63e-15	6	HMJ22-RS00545
HMJ22-RS18890.1	3.1e-18	0.312166	0.536	0.231	1.47e-14	6	HMJ22-RS18890
HMJ22-RS01580.2	3.8e-18	0.411705	0.716	0.345	1.8e-14	6	HMJ22-RS01580
HMJ22-RS23440	3.8e-18	0.412053	0.291	0.101	1.8e-14	6	HMJ22-RS23440
HMJ22-RS10555	4.42e-18	0.366311	0.276	0.092	2.09e-14	6	HMJ22-RS10555
HMJ22-RS06000	5.59e-18	0.30311	0.475	0.198	2.65e-14	6	HMJ22-RS06000
HMJ22-RS21925	1.14e-17	0.448263	0.368	0.145	5.41e-14	6	HMJ22-RS21925
HMJ22-RS22675.1	1.18e-17	0.260911	0.582	0.26	5.59e-14	6	HMJ22-RS22675
HMJ22-RS07750	1.61e-17	0.338086	0.268	0.089	7.61e-14	6	HMJ22-RS07750
HMJ22-RS06190.2	2.44e-17	0.27147	0.575	0.257	1.15e-13	6	HMJ22-RS06190
HMJ22-RS14995	2.73e-17	0.290782	0.261	0.087	1.29e-13	6	HMJ22-RS14995
HMJ22-RS21030	2.83e-17	0.411488	0.303	0.109	1.34e-13	6	HMJ22-RS21030
HMJ22-RS18495	3.65e-17	0.305604	0.345	0.131	1.73e-13	6	HMJ22-RS18495
HMJ22-RS01800	5.03e-17	0.298653	0.391	0.158	2.38e-13	6	HMJ22-RS01800
HMJ22-RS13680	8.98e-17	0.354244	0.261	0.088	4.25e-13	6	HMJ22-RS13680
HMJ22-RS24620	1.24e-16	0.329351	0.268	0.092	5.86e-13	6	HMJ22-RS24620
HMJ22-RS02875.1	1.54e-16	0.273341	0.398	0.163	7.31e-13	6	HMJ22-RS02875
HMJ22-RS01665.2	1.64e-16	0.265283	0.498	0.218	7.75e-13	6	HMJ22-RS01665
HMJ22-RS20550.1	2.01e-16	0.267932	0.617	0.289	9.49e-13	6	HMJ22-RS20550
HMJ22-RS17475	2.44e-16	0.418875	0.268	0.094	1.15e-12	6	HMJ22-RS17475
HMJ22-RS18885.1	4.74e-16	0.264771	0.341	0.134	2.25e-12	6	HMJ22-RS18885
HMJ22-RS03160.1	1.17e-15	0.35688	0.314	0.122	5.55e-12	6	HMJ22-RS03160
HMJ22-RS18785	1.39e-15	0.346875	0.268	0.096	6.6e-12	6	HMJ22-RS18785
HMJ22-RS01175.3	1.94e-15	0.401396	0.946	0.591	9.18e-12	6	HMJ22-RS01175
HMJ22-RS03060	2.09e-15	0.300816	0.253	0.089	9.9e-12	6	HMJ22-RS03060
HMJ22-RS16250	2.1e-15	0.260265	0.276	0.101	9.92e-12	6	HMJ22-RS16250
HMJ22-RS13825.3	2.43e-15	0.262262	0.625	0.295	1.15e-11	6	HMJ22-RS13825
HMJ22-RS10150.4	2.59e-15	0.256718	0.49	0.222	1.23e-11	6	HMJ22-RS10150
HMJ22-RS03565.3	2.72e-15	0.292374	0.72	0.364	1.29e-11	6	HMJ22-RS03565
HMJ22-RS02125	4.09e-15	0.268714	0.437	0.191	1.94e-11	6	HMJ22-RS02125
HMJ22-RS22365	6.25e-15	0.299784	0.253	0.09	2.96e-11	6	HMJ22-RS22365
HMJ22-RS07910.2	9.7e-15	0.282477	0.705	0.354	4.59e-11	6	HMJ22-RS07910
HMJ22-RS08725	1.2e-14	0.330435	0.322	0.129	5.69e-11	6	HMJ22-RS08725
HMJ22-RS17310	1.97e-14	0.27567	0.264	0.098	9.33e-11	6	HMJ22-RS17310
HMJ22-RS23810	2.04e-14	0.274786	0.272	0.102	9.64e-11	6	HMJ22-RS23810
HMJ22-RS02815	4.09e-14	0.278899	0.28	0.108	1.94e-10	6	HMJ22-RS02815
HMJ22-RS14405.1	4.33e-14	0.25328	0.31	0.123	2.05e-10	6	HMJ22-RS14405
HMJ22-RS03175.1	4.68e-14	0.361635	0.257	0.095	2.22e-10	6	HMJ22-RS03175
HMJ22-RS19125	4.75e-14	0.433208	0.31	0.128	2.25e-10	6	HMJ22-RS19125
HMJ22-RS05645.4	5.86e-14	0.431351	0.483	0.237	2.77e-10	6	HMJ22-RS05645
HMJ22-RS18720	8.1e-14	0.26722	0.257	0.096	3.83e-10	6	HMJ22-RS18720
HMJ22-RS01255	1.35e-13	0.29634	0.341	0.147	6.39e-10	6	HMJ22-RS01255
HMJ22-RS05465	1.74e-13	0.276178	0.295	0.118	8.23e-10	6	HMJ22-RS05465
HMJ22-RS05720	3.68e-13	0.266874	0.291	0.118	1.74e-09	6	HMJ22-RS05720
HMJ22-RS17875	3.85e-13	0.274404	0.291	0.118	1.82e-09	6	HMJ22-RS17875
HMJ22-RS01915	1.06e-12	0.259924	0.728	0.384	5.01e-09	6	HMJ22-RS01915
HMJ22-RS06490.5	2.09e-12	-0.834963	0.854	0.716	9.89e-09	6	HMJ22-RS06490
HMJ22-RS06500.5	3.66e-12	-1.57006	0.49	0.525	1.73e-08	6	HMJ22-RS06500
HMJ22-RS10090	5.77e-12	0.268322	0.261	0.106	2.73e-08	6	HMJ22-RS10090
HMJ22-RS12895.6	6.07e-12	-0.365318	1	0.972	2.87e-08	6	HMJ22-RS12895
HMJ22-RS12880.1	2.42e-10	0.286075	0.946	0.628	1.15e-06	6	HMJ22-RS12880
HMJ22-RS23670.6	1.47e-08	-0.340384	1	0.954	6.97e-05	6	HMJ22-RS23670
HMJ22-RS06850.6	7.99e-08	-0.51553	0.935	0.787	0.000378037	6	HMJ22-RS06850
HMJ22-RS00295	9.64e-08	-0.329642	0.307	0.151	0.000456374	6	HMJ22-RS00295
HMJ22-RS06485.4	4.98e-07	-1.18017	0.544	0.51	0.0023563	6	HMJ22-RS06485
HMJ22-RS04790.6	3.26e-06	-0.54289	0.9	0.728	0.0154123	6	HMJ22-RS04790
HMJ22-RS09735	5.14e-06	-0.323342	0.349	0.19	0.0243178	6	HMJ22-RS09735
HMJ22-RS08855.1	1.08e-05	-0.281143	0.395	0.223	0.0509073	6	HMJ22-RS08855
HMJ22-RS02925.1	4.78e-05	-0.32567	0.31	0.176	0.22627	6	HMJ22-RS02925
HMJ22-RS00950.1	7.01e-05	-0.290493	0.295	0.167	0.332038	6	HMJ22-RS00950
HMJ22-RS12715.5	0.000108523	-1.44814	0.218	0.289	0.513747	6	HMJ22-RS12715
HMJ22-RS10180.1	0.000151832	-0.26894	0.349	0.21	0.718771	6	HMJ22-RS10180
HMJ22-RS19660.2	0.000274992	-0.402637	0.398	0.237	1	6	HMJ22-RS19660
HMJ22-RS03075.1	0.000332103	-0.252751	0.533	0.324	1	6	HMJ22-RS03075
HMJ22-RS07070.4	0.000379215	-0.322051	0.479	0.291	1	6	HMJ22-RS07070
HMJ22-RS08895.1	0.000419579	-0.37279	0.391	0.238	1	6	HMJ22-RS08895
HMJ22-RS05355	0.000557797	-0.322419	0.307	0.186	1	6	HMJ22-RS05355
HMJ22-RS06495.5	0.000802292	-1.35661	0.23	0.284	1	6	HMJ22-RS06495
HMJ22-RS08815.3	0.00116863	-0.340638	0.398	0.249	1	6	HMJ22-RS08815
HMJ22-RS08835.2	0.00138955	-0.318929	0.498	0.306	1	6	HMJ22-RS08835
HMJ22-RS00310.1	0.00142526	-0.326094	0.341	0.215	1	6	HMJ22-RS00310
HMJ22-RS21260.1	0.00175273	-0.307584	0.272	0.171	1	6	HMJ22-RS21260
HMJ22-RS05115.1	0.00199039	-0.441577	0.368	0.231	1	6	HMJ22-RS05115
HMJ22-RS01890.3	0.0021226	-0.33404	0.402	0.255	1	6	HMJ22-RS01890
HMJ22-RS04690.1	0.00246836	-0.414203	0.475	0.298	1	6	HMJ22-RS04690
HMJ22-RS23005.1	0.00270784	-0.26095	0.693	0.425	1	6	HMJ22-RS23005
HMJ22-RS02235.4	0.00301421	-0.345365	0.402	0.259	1	6	HMJ22-RS02235
HMJ22-RS21890.1	0.00344764	-0.322348	0.28	0.179	1	6	HMJ22-RS21890
HMJ22-RS03285.1	0.00443896	-0.275153	0.533	0.34	1	6	HMJ22-RS03285
HMJ22-RS09070.2	0.00447247	-0.368959	0.506	0.321	1	6	HMJ22-RS09070
HMJ22-RS08670	0.00513868	-0.379022	0.341	0.224	1	6	HMJ22-RS08670
HMJ22-RS19740.2	0.00651935	-0.414527	0.87	0.679	1	6	HMJ22-RS19740
HMJ22-RS20905.3	0.00908714	-0.335033	0.621	0.389	1	6	HMJ22-RS20905
